# Supplementary material for: Sequence Composition and Gene Content of the Short Arm of Rye (Secale cereale) Chromosome 1
Source: PLoS One. 2012 Feb 6;7(2):e30784. doi: 10.1371/journal.pone.0030784 (PMC3273464; doi:10.1371/journal.pone.0030784)
Supplement: Table S4 — SSR region based putative marker sites. (XLS) [file pone.0030784.s005.xls]

## Sheet: All SSRs
Number of reads with SSR	Number of motifs			Total number of analysed sequence reads		895199
165629	204286
Listed by Motif				Listed by frequency
Standardized Motif	Count			Standardized Motif	Count	% of all sequence reads
A	37904			AG	43210	4.82686
C	20924			A	37904	4.23414
AC	22502			AT	30924	3.45443
AG	43210			AC	22502	2.51363
AT	30924			C	20924	2.33736
CG	3623			AAG	6015	0.671918
AAC	1829			ATC	5205	0.581435
AAG	6015			CCG	4333	0.484026
AAT	1451			AGG	3705	0.413874
ACC	1934			CG	3623	0.404714
ACG	549			ACC	1934	0.216041
ACT	777			AAC	1829	0.204312
AGC	1040			AAAT	1680	0.187668
AGG	3705			AAT	1451	0.162087
ATC	5205			AGGG	1107	0.12366
CCG	4333			AAAG	1066	0.11908
AAAC	772			AGC	1040	0.116175
AAAG	1066			ATGC	890	0.0994192
AAAT	1680			AAAAG	801	0.0894773
AACC	120			AAGC	784	0.0875783
AACG	115			ACT	777	0.0867963
AACT	82			AAAC	772	0.0862378
AAGC	784			AATT	712	0.0795354
AAGG	620			ATAC	654	0.0730564
AAGT	55			AAGG	620	0.0692583
AATC	251			ACG	549	0.0613271
AATG	186			CCGG	540	0.0603218
AATT	712			ACCC	516	0.0576408
ACAG	34			AAAAT	466	0.0520555
ACCC	516			AGGC	432	0.0482574
ACCG	55			AGCT	397	0.0443477
ACCT	74			ACGC	358	0.0399911
ACGC	358			AATC	251	0.0280385
ACGG	95			ATAG	249	0.027815
ACGT	67			ATCC	226	0.0252458
ACTC	116			AAAAAG	217	0.0242404
ACTG	58			AGCG	213	0.0237936
AGCC	176			AGGGG	213	0.0237936
AGCG	213			ATCG	203	0.0226765
AGCT	397			AGAGG	192	0.0214477
AGGC	432			AATG	186	0.0207775
AGGG	1107			AAAATT	180	0.0201073
ATAC	654			AGCC	176	0.0196604
ATAG	249			AGAGGG	176	0.0196604
ATCC	226			AATGC	154	0.0172029
ATCG	203			AAAAC	153	0.0170912
ATGC	890			CCCG	141	0.0157507
CCCG	141			AAAAAT	137	0.0153039
CCGG	540			AAGAGG	123	0.01374
AAAAC	153			AAGAG	121	0.0135165
AAAAG	801			AACC	120	0.0134048
AAAAT	466			ACTC	116	0.012958
AAACC	76			AACG	115	0.0128463
AAACG	4			AAATC	110	0.0122878
AAACT	27			ACGG	95	0.0106122
AAAGC	20			AACT	82	0.00915997
AAAGG	30			AAACC	76	0.00848973
AAAGT	6			ACCT	74	0.00826632
AAATC	110			AAGGAG	72	0.0080429
AAATG	13			ACGT	67	0.00748437
AAATT	32			ACTG	58	0.00647901
AACAC	17			AAGT	55	0.00614389
AACAG	8			ACCG	55	0.00614389
AACAT	8			ATATC	49	0.00547364
AACCC	8			ATCAC	48	0.00536194
AACCG	3			AACTCC	45	0.00502682
AACCT	8			ACCCC	44	0.00491511
AACGC	4			AAAGAT	42	0.00469169
AACGG	2			CCCGG	39	0.00435657
AACGT	2			AGGCGG	38	0.00424487
AACTC	4			AAGAGC	36	0.00402145
AACTG	11			AAGGG	35	0.00390975
AACTT	1			ACAG	34	0.00379804
AAGAC	11			ACCCCC	34	0.00379804
AAGAG	121			AATAT	33	0.00368633
AAGAT	12			AGAGC	33	0.00368633
AAGCC	4			ATCTC	33	0.00368633
AAGCG	2			ATCACC	33	0.00368633
AAGCT	2			AAATT	32	0.00357462
AAGGC	8			ATATAG	32	0.00357462
AAGGG	35			AGGCG	31	0.00346292
AAGGT	2			AAAGG	30	0.00335121
AAGTC	22			AATCC	29	0.0032395
AAGTG	3			AAACT	27	0.00301609
AATAC	13			AAATTC	27	0.00301609
AATAG	5			AACCGC	25	0.00279268
AATAT	33			ATCCCC	25	0.00279268
AATCC	29			AATGGG	24	0.00268097
AATCG	2			AGCCC	23	0.00256926
AATCT	10			CCCCG	23	0.00256926
AATGC	154			AAGTC	22	0.00245755
AATGG	17			ACCGC	22	0.00245755
AATGT	4			AAAAAC	22	0.00245755
AATTC	6			ACCGG	21	0.00234585
ACACC	9			ACGCC	21	0.00234585
ACACG	2			CCGCG	21	0.00234585
ACACT	5			AAAGC	20	0.00223414
ACAGC	4			AACAGC	20	0.00223414
ACAGT	2			AGGGCG	19	0.00212243
ACCAG	2			ACGGGC	18	0.00201073
ACCCC	44			AACAC	17	0.00189902
ACCCG	9			AATGG	17	0.00189902
ACCCT	2			AAAATG	17	0.00189902
ACCGC	22			AATGGT	17	0.00189902
ACCGG	21			ACGGG	16	0.00178731
ACCGT	4			ACCTCC	16	0.00178731
ACCTC	13			AGGGGG	16	0.00178731
ACGAG	4			ACCGCC	14	0.0015639
ACGCC	21			ACGGCG	14	0.0015639
ACGCG	9			AAATG	13	0.00145219
ACGCT	1			AATAC	13	0.00145219
ACGGC	3			ACCTC	13	0.00145219
ACGGG	16			AAAAGG	13	0.00145219
ACGTC	2			AAGAT	12	0.00134048
ACTAG	11			AGCCT	12	0.00134048
ACTCC	8			ATCTCC	12	0.00134048
ACTCG	2			AACTG	11	0.00122878
ACTGC	4			AAGAC	11	0.00122878
ACTGG	3			ACTAG	11	0.00122878
AGAGC	33			AAATGG	11	0.00122878
AGAGG	192			ACACGC	11	0.00122878
AGCCC	23			ACGAGG	11	0.00122878
AGCCG	5			ATACAC	11	0.00122878
AGCCT	12			AATCT	10	0.00111707
AGCGC	3			AAAGGC	10	0.00111707
AGCGG	7			AAATTT	10	0.00111707
AGCTC	7			AACAGT	10	0.00111707
AGGCC	2			AACTAG	10	0.00111707
AGGCG	31			ACCCCG	10	0.00111707
AGGGC	2			ACACC	9	0.00100536
AGGGG	213			ACCCG	9	0.00100536
ATACC	3			ACGCG	9	0.00100536
ATACT	3			ATCCC	9	0.00100536
ATAGC	7			ATGCC	9	0.00100536
ATAGG	6			AAAACT	9	0.00100536
ATATC	49			AAAAGC	9	0.00100536
ATCAC	48			AAAATC	9	0.00100536
ATCAG	6			AACAAG	9	0.00100536
ATCCC	9			ACACCT	9	0.00100536
ATCCG	3			AGCCGG	9	0.00100536
ATCGC	1			AGCGGC	9	0.00100536
ATCTC	33			ATATCC	9	0.00100536
ATGAC	5			AACAG	8	0.000893656
ATGCC	9			AACAT	8	0.000893656
CCCCG	23			AACCC	8	0.000893656
CCCGG	39			AACCT	8	0.000893656
CCGCG	21			AAGGC	8	0.000893656
AAAAAC	22			ACTCC	8	0.000893656
AAAAAG	217			AAGCAG	8	0.000893656
AAAAAT	137			AGCTCC	8	0.000893656
AAAACC	2			AGCGG	7	0.000781949
AAAACG	1			AGCTC	7	0.000781949
AAAACT	9			ATAGC	7	0.000781949
AAAAGC	9			AAAGGG	7	0.000781949
AAAAGG	13			AAATCC	7	0.000781949
AAAAGT	1			AACCCT	7	0.000781949
AAAATC	9			AATCAT	7	0.000781949
AAAATG	17			AATCTC	7	0.000781949
AAAATT	180			ACCACG	7	0.000781949
AAACAC	2			ACCGTC	7	0.000781949
AAACAG	3			ACGGAG	7	0.000781949
AAACCC	2			ACGGCC	7	0.000781949
AAACCG	4			AAAGT	6	0.000670242
AAACCT	2			AATTC	6	0.000670242
AAACGC	3			ATAGG	6	0.000670242
AAACGT	2			ATCAG	6	0.000670242
AAACTG	1			AACGAC	6	0.000670242
AAACTT	1			AAGGGG	6	0.000670242
AAAGAC	2			ACGCCG	6	0.000670242
AAAGAG	4			ACTCCG	6	0.000670242
AAAGAT	42			AGCCTG	6	0.000670242
AAAGCC	4			ATCTAC	6	0.000670242
AAAGGC	10			CCGGCG	6	0.000670242
AAAGGG	7			AATAG	5	0.000558535
AAAGTC	3			ACACT	5	0.000558535
AAATAC	2			AGCCG	5	0.000558535
AAATAG	2			ATGAC	5	0.000558535
AAATAT	3			AATCAG	5	0.000558535
AAATCC	7			ACTAGC	5	0.000558535
AAATGG	11			ACTAGT	5	0.000558535
AAATGT	1			AGCAGG	5	0.000558535
AAATTC	27			AGCCGC	5	0.000558535
AAATTT	10			ATAGAG	5	0.000558535
AACAAG	9			ATCGGC	5	0.000558535
AACACT	4			AAACG	4	0.000446828
AACAGC	20			AACGC	4	0.000446828
AACAGT	10			AACTC	4	0.000446828
AACATG	1			AAGCC	4	0.000446828
AACCAT	4			AATGT	4	0.000446828
AACCCC	3			ACAGC	4	0.000446828
AACCCG	1			ACCGT	4	0.000446828
AACCCT	7			ACGAG	4	0.000446828
AACCGC	25			ACTGC	4	0.000446828
AACCTG	3			AAACCG	4	0.000446828
AACGAC	6			AAAGAG	4	0.000446828
AACGCT	1			AAAGCC	4	0.000446828
AACGGT	1			AACACT	4	0.000446828
AACTAG	10			AACCAT	4	0.000446828
AACTCC	45			AAGACG	4	0.000446828
AACTGC	3			ACAGAG	4	0.000446828
AACTTC	1			ACGCCC	4	0.000446828
AAGACG	4			ACGGGG	4	0.000446828
AAGAGC	36			ACTCGG	4	0.000446828
AAGAGG	123			ATCCTC	4	0.000446828
AAGATC	1			AACCG	3	0.000335121
AAGATG	1			AAGTG	3	0.000335121
AAGCAG	8			ACGGC	3	0.000335121
AAGCCC	1			ACTGG	3	0.000335121
AAGGAG	72			AGCGC	3	0.000335121
AAGGCC	2			ATACC	3	0.000335121
AAGGGC	2			ATACT	3	0.000335121
AAGGGG	6			ATCCG	3	0.000335121
AAGGTG	2			AAACAG	3	0.000335121
AAGTAC	2			AAACGC	3	0.000335121
AAGTAG	1			AAAGTC	3	0.000335121
AAGTCT	1			AAATAT	3	0.000335121
AAGTGG	3			AACCCC	3	0.000335121
AATAAG	3			AACCTG	3	0.000335121
AATAGC	2			AACTGC	3	0.000335121
AATATC	1			AAGTGG	3	0.000335121
AATATG	3			AATAAG	3	0.000335121
AATATT	2			AATATG	3	0.000335121
AATCAC	1			ACACCC	3	0.000335121
AATCAG	5			ACGCGC	3	0.000335121
AATCAT	7			ACTCCC	3	0.000335121
AATCTC	7			ACTCCT	3	0.000335121
AATCTT	2			AGAGGC	3	0.000335121
AATGAG	1			ATACCC	3	0.000335121
AATGAT	1			CCCCCG	3	0.000335121
AATGCC	2			CCCCGG	3	0.000335121
AATGGC	1			AACGG	2	0.000223414
AATGGG	24			AACGT	2	0.000223414
AATGGT	17			AAGCG	2	0.000223414
ACACCC	3			AAGCT	2	0.000223414
ACACCT	9			AAGGT	2	0.000223414
ACACGC	11			AATCG	2	0.000223414
ACACGT	1			ACACG	2	0.000223414
ACACTC	2			ACAGT	2	0.000223414
ACACTG	2			ACCAG	2	0.000223414
ACAGAG	4			ACCCT	2	0.000223414
ACAGCG	1			ACGTC	2	0.000223414
ACCACG	7			ACTCG	2	0.000223414
ACCAGC	2			AGGCC	2	0.000223414
ACCCCC	34			AGGGC	2	0.000223414
ACCCCG	10			AAAACC	2	0.000223414
ACCCGC	2			AAACAC	2	0.000223414
ACCCGT	1			AAACCC	2	0.000223414
ACCCTC	2			AAACCT	2	0.000223414
ACCGCC	14			AAACGT	2	0.000223414
ACCGCG	1			AAAGAC	2	0.000223414
ACCGTC	7			AAATAC	2	0.000223414
ACCTCC	16			AAATAG	2	0.000223414
ACCTGC	1			AAGGCC	2	0.000223414
ACCTGG	1			AAGGGC	2	0.000223414
ACGAGG	11			AAGGTG	2	0.000223414
ACGCCC	4			AAGTAC	2	0.000223414
ACGCCG	6			AATAGC	2	0.000223414
ACGCGC	3			AATATT	2	0.000223414
ACGGAG	7			AATCTT	2	0.000223414
ACGGCC	7			AATGCC	2	0.000223414
ACGGCG	14			ACACTC	2	0.000223414
ACGGCT	1			ACACTG	2	0.000223414
ACGGGC	18			ACCAGC	2	0.000223414
ACGGGG	4			ACCCGC	2	0.000223414
ACGTCC	1			ACCCTC	2	0.000223414
ACTAGC	5			ACTCGC	2	0.000223414
ACTAGG	1			AGAGCC	2	0.000223414
ACTAGT	5			AGCGGG	2	0.000223414
ACTCCC	3			AGCTCG	2	0.000223414
ACTCCG	6			AGGCGC	2	0.000223414
ACTCCT	3			AGGGGC	2	0.000223414
ACTCGC	2			ATCTGG	2	0.000223414
ACTCGG	4			ATGCCC	2	0.000223414
ACTGCC	1			ATGTGC	2	0.000223414
ACTGCT	1			AACTT	1	0.000111707
ACTGGC	1			ACGCT	1	0.000111707
ACTGGG	1			ATCGC	1	0.000111707
AGAGCC	2			AAAACG	1	0.000111707
AGAGCT	1			AAAAGT	1	0.000111707
AGAGGC	3			AAACTG	1	0.000111707
AGAGGG	176			AAACTT	1	0.000111707
AGCAGG	5			AAATGT	1	0.000111707
AGCCGC	5			AACATG	1	0.000111707
AGCCGG	9			AACCCG	1	0.000111707
AGCCTG	6			AACGCT	1	0.000111707
AGCGCC	1			AACGGT	1	0.000111707
AGCGCG	1			AACTTC	1	0.000111707
AGCGGC	9			AAGATC	1	0.000111707
AGCGGG	2			AAGATG	1	0.000111707
AGCTCC	8			AAGCCC	1	0.000111707
AGCTCG	2			AAGTAG	1	0.000111707
AGCTGC	1			AAGTCT	1	0.000111707
AGGCCC	1			AATATC	1	0.000111707
AGGCCG	1			AATCAC	1	0.000111707
AGGCGC	2			AATGAG	1	0.000111707
AGGCGG	38			AATGAT	1	0.000111707
AGGGCG	19			AATGGC	1	0.000111707
AGGGGC	2			ACACGT	1	0.000111707
AGGGGG	16			ACAGCG	1	0.000111707
ATACAC	11			ACCCGT	1	0.000111707
ATACCC	3			ACCGCG	1	0.000111707
ATAGAG	5			ACCTGC	1	0.000111707
ATAGTG	1			ACCTGG	1	0.000111707
ATATAC	1			ACGGCT	1	0.000111707
ATATAG	32			ACGTCC	1	0.000111707
ATATCC	9			ACTAGG	1	0.000111707
ATATGC	1			ACTGCC	1	0.000111707
ATCACC	33			ACTGCT	1	0.000111707
ATCAGC	1			ACTGGC	1	0.000111707
ATCCAC	1			ACTGGG	1	0.000111707
ATCCCC	25			AGAGCT	1	0.000111707
ATCCTC	4			AGCGCC	1	0.000111707
ATCGGC	5			AGCGCG	1	0.000111707
ATCGTC	1			AGCTGC	1	0.000111707
ATCTAC	6			AGGCCC	1	0.000111707
ATCTCC	12			AGGCCG	1	0.000111707
ATCTGG	2			ATAGTG	1	0.000111707
ATGCCC	2			ATATAC	1	0.000111707
ATGTGC	2			ATATGC	1	0.000111707
CCCCCG	3			ATCAGC	1	0.000111707
CCCCGG	3			ATCCAC	1	0.000111707
CCGCGG	1			ATCGTC	1	0.000111707
CCGGCG	6			CCGCGG	1	0.000111707

## Sheet: SSR reads
Details of SSR motifs identified in "exclusive SSR" sequence reads (SRs)
Number of sequence reads analysed		2048		Distance of SSR from either end
Average read length; bp		120.53		>=40 bp		>=30 bp
			SSR motifs in usable position	601	13.7 %	863	19.7 %
			Sequence reads with at least one usable SSR motif	321	15.7 %	455	22.2 %
Number of sequence reads	Number of SSRs
2048	4379
Sequence Name	Length; bp	SSR motif	SSR Motif_Standardised	SSR Start; bp		SSR End; bp		SSR Length; bp	SSR Repetitions	SSR disatnce upstream; bp	SSR distance downsream; bp
046112_1767_1442	92	TC	AG	41		52		12	6	41	40
258991_2613_0511	95	GT	AC	41		50		10	5	41	45
278876_0633_1924	95	TC	AG	42		49		8	4	42	46
227644_3727_3255	97	TC	AG	42		49		8	4	42	48
016919_0879_1399	98	AT	AT	43		50		8	4	43	48
236683_0597_2683	99	CT	AG	44		53		10	5	44	46
118887_3182_3548	100	GTA	ACT	40		59		20	6	40	41
320498_0351_0891	101	TC	AG	41		50		10	5	41	51
073396_0866_2738	103	C	C	41		52		12	12	41	51
113136_2233_0443	103	AC	AC	47		57		11	5	47	46
235191_2009_1004	103	ACACA	AACAC	40		54		15	3	40	49
032636_2342_2498	104	ATT	AAT	40		60		21	7	40	44
118596_0912_2102	104	TGT	AAC	50		63		14	4	50	41
343120_3028_3603	104	CAA	AAC	44		63		20	6	44	41
359189_1223_2395	104	TG	AC	44		59		16	8	44	45
054806_1583_0046	105	CTGTTG	AACAGC	41		58		18	3	41	47
435252_0744_2998	105	CT	AG	52		59		8	4	52	46
012484_1336_1442	106	TTGCTG	AACAGC	44		61		18	3	44	45
049306_3664_1372	106	AC	AC	50		60		11	5	50	46
120797_0097_3401	108	TG	AC	47		56		10	5	47	52
073971_2408_2986	109	TG	AC	53		64		12	6	53	45
329986_2791_2948	109	CG	CG	59		68		10	5	59	41
069010_0954_0688	110	GCA	AGC	41		52		12	4	41	58
000435_1642_1999	111	CTT	AAG	53		66		14	4	53	45
308875_2676_2823	112	TAGA	ATAG	50		61		12	3	50	51
330849_0995_0116	112	A	A	44		52		9	9	44	60
056980_3099_1746	113	ACG	ACG	40		61		22	7	40	52
290805_2688_0049	113	GT	AC	40		48		9	4	40	65
091112_1873_0776	114	GTGTTG	AACACC	46		63		18	3	46	51
290757_1068_2071	114	A	A	45		54		10	10	45	60
311591_2227_2885	115	TGC	AGC	50		63		14	4	50	52
024133_1135_1720	116	CAA	AAC	59		72		14	4	59	44
012804_1982_1413	117	CTG	AGC	46		57		12	4	46	60
028618_2664_3972	117	TA	AT	51		68		18	9	51	49
214189_1560_0145	117	TTGCTG	AACAGC	48		74		27	4	48	43
269236_2486_2779	117	GT	AC	54		71		18	9	54	46
337547_3711_2997	117	GT	AC	45		56		12	6	45	61
337547_3711_2997	117	TG	AC	58		71		14	7	58	46
357500_3833_1385	117	CT	AG	57		68		12	6	57	49
005880_2532_0358	118	TA	AT	51		68		18	9	51	50
102140_1959_2101	118	GT	AC	48		58		11	5	48	60
102140_1959_2101	118	GT	AC	60		68		9	4	60	50
110560_0717_1548	118	CAA	AAC	48		78		31	10	48	40
365685_0968_3576	118	CAA	AAC	44		63		20	6	44	55
002899_0839_3625	119	TGT	AAC	40		53		14	4	40	66
221420_3151_3407	119	AAC	AAC	52		71		20	6	52	48
007792_1106_1843	121	TGT	AAC	48		64		17	5	48	57
044076_3879_0890	121	TA	AT	53		70		18	9	53	51
120428_2123_0558	121	TCT	AAG	61		74		14	4	61	47
146655_1163_1220	123	GA	AG	42		49		8	4	42	74
146655_1163_1220	123	GA	AG	56		63		8	4	56	60
002274_1694_3661	124	TTC	AAG	59		70		12	4	59	54
195600_1559_4035	124	CA	AC	58		80		23	11	58	44
380477_1440_0040	124	AG	AG	57		68		12	6	57	56
013600_1590_1729	125	CAA	AAC	44		62		19	6	44	63
070892_3749_1387	125	TGT	AAC	60		73		14	4	60	52
070892_3749_1387	125	TTGCTG	AACAGC	41		58		18	3	41	67
287996_3052_3956	126	CTC	AGG	48		62		15	5	48	64
369947_0988_1990	126	TG	AC	51		60		10	5	51	66
408689_3763_3596	126	CACG	ACGC	57		70		14	3	57	56
387343_3998_0755	127	TCT	AAG	57		70		14	4	57	57
082859_3562_3772	129	CTT	AAG	62		84		23	7	62	45
119906_2815_0633	129	AC	AC	51		85		35	17	51	44
033614_1995_1043	130	GTT	AAC	63		74		12	4	63	56
047018_0168_3032	130	TTC	AAG	54		86		33	11	54	44
396625_0105_2040	130	AC	AC	42		51		10	5	42	79
396625_0105_2040	130	GC	CG	52		61		10	5	52	69
041505_2636_3918	131	TC	AG	40		62		23	11	40	69
041505_2636_3918	131	CT	AG	64		79		16	8	64	52
090075_2420_3896	131	TTC	AAG	77		89		13	4	77	42
195780_3027_2364	131	AG	AG	51		59		9	4	51	72
195780_3027_2364	131	AGAT	ATAG	63		77		15	3	63	54
351457_2553_0731	131	AGAT	ATAG	55		71		17	4	55	60
434084_0595_0604	132	GGAG	AGGG	71		83		13	3	71	49
116602_1060_1910	133	TG	AC	53		60		8	4	53	73
119839_1996_1392	133	TGT	AAC	44		55		12	4	44	78
241806_3349_2378	133	CAA	AAC	44		63		20	6	44	70
301504_3702_3211	133	AT	AT	44		76		33	16	44	57
023603_1480_2867	134	AG	AG	54		62		9	4	54	72
023603_1480_2867	134	AGAT	ATAG	66		80		15	3	66	54
098721_0818_0553	134	CAA	AAC	44		63		20	6	44	71
185796_2785_2320	134	TTG	AAC	54		90		37	12	54	44
156025_1659_2670	135	TGT	AAC	56		68		13	4	56	67
192262_1326_1584	135	AG	AG	43		62		20	10	43	73
192262_1326_1584	135	GAG	AGG	63		74		12	4	63	61
267391_1749_2598	135	ACA	AAC	63		79		17	5	63	56
273138_2439_3885	135	CAA	AAC	44		63		20	6	44	72
100852_1916_1369	136	CAA	AAC	53		66		14	4	53	70
100852_1916_1369	136	CAA	AAC	68		81		14	4	68	55
054938_1870_3782	137	TGT	AAC	66		79		14	4	66	58
088236_0792_1179	137	GAA	AAG	53		67		15	5	53	70
031373_3570_0392	138	CTT	AAG	78		96		19	6	78	42
066627_1941_0425	138	CAA	AAC	44		63		20	6	44	75
109542_1686_1419	138	CA	AC	69		76		8	4	69	62
109542_1686_1419	138	CA	AC	83		92		10	5	83	46
109542_1686_1419	138	CACC	ACCC	58		69		12	3	58	69
132056_3492_3257	138	TTC	AAG	53		89		37	12	53	49
210715_1456_0809	138	AAC	AAC	51		69		19	6	51	69
289337_3167_1554	138	TTG	AAC	51		82		32	10	51	56
297911_1119_0115	138	CT	AG	47		62		16	8	47	76
368714_2549_1222	138	TCT	AAG	56		69		14	4	56	69
368714_2549_1222	138	TCT	AAG	71		84		14	4	71	54
369840_1495_0729	138	TCT	AAG	58		78		21	7	58	60
136771_2722_2256	139	TTC	AAG	43		60		18	6	43	79
283303_1876_1608	139	AAC	AAC	54		90		37	12	54	49
283303_1876_1608	139	TAC	ACT	42		53		12	4	42	86
305705_1975_1189	139	ACA	AAC	47		58		12	4	47	81
390915_0780_0195	140	TGT	AAC	62		75		14	4	62	65
390915_0780_0195	140	TGT	AAC	77		90		14	4	77	50
142756_2666_1780	141	CGCA	ACGC	69		84		16	4	69	57
167367_3527_3766	141	ACA	AAC	42		56		15	5	42	85
167367_3527_3766	141	AAC	AAC	70		95		26	8	70	46
321649_2483_1129	141	GA	AG	62		79		18	9	62	62
379588_2414_3053	141	GT	AC	62		72		11	5	62	69
379588_2414_3053	141	TG	AC	81		90		10	5	81	51
146562_1379_1362	142	AC	AC	41		61		21	10	41	81
146562_1379_1362	142	GA	AG	70		78		9	4	70	64
146562_1379_1362	142	TA	AT	62		69		8	4	62	73
053007_2953_0997	143	TAGA	ATAG	55		89		35	8	55	54
200351_1156_3940	143	TGT	AAC	51		64		14	4	51	79
200351_1156_3940	143	TGTTGC	AACAGC	75		94		20	3	75	49
078441_1913_1375	144	TG	AC	70		96		27	13	70	48
018641_1399_1935	145	AAC	AAC	49		66		18	6	49	79
150547_2485_2951	146	ACT	ACT	76		87		12	4	76	59
029481_2316_3373	147	AC	AC	43		95		53	26	43	52
120507_0714_1700	147	AAG	AAG	59		70		12	4	59	77
266282_3136_3271	147	AAG	AAG	49		65		17	5	49	82
266282_3136_3271	147	TTC	AAG	81		103		23	7	81	44
427967_0097_1368	147	CAA	AAC	41		54		14	4	41	93
133628_2467_3341	148	AC	AC	49		66		18	9	49	82
133628_2467_3341	148	C	C	82		90		9	9	82	58
133628_2467_3341	148	GC	CG	67		76		10	5	67	72
316795_0872_1049	148	AC	AC	66		73		8	4	66	75
316795_0872_1049	148	TC	AG	84		91		8	4	84	57
316795_0872_1049	148	CT	AG	93		101		9	4	93	47
012946_1338_1977	149	TCT	AAG	57		69		13	4	57	80
012946_1338_1977	149	TTC	AAG	86		98		13	4	86	51
198827_0451_0679	149	TTC	AAG	45		77		33	11	45	72
084799_3007_0268	150	TGT	AAC	40		110		71	23	40	40
030959_1484_1101	151	TTC	AAG	47		63		17	5	47	88
030959_1484_1101	151	TTC	AAG	65		81		17	5	65	70
123675_1043_1834	151	AAC	AAC	67		78		12	4	67	73
123675_1043_1834	151	AAC	AAC	87		106		20	6	87	45
125029_1212_1731	151	TCT	AAG	57		80		24	8	57	71
125029_1212_1731	151	CTT	AAG	82		101		20	6	82	50
025123_1639_2551	152	TGT	AAC	59		72		14	4	59	80
058692_1456_2144	152	TTG	AAC	40		51		12	4	40	101
058692_1456_2144	152	TTG	AAC	73		84		12	4	73	68
397039_1335_1533	152	TTC	AAG	68		99		32	10	68	53
454208_2923_0514	152	A	A	44		51		8	8	44	101
454208_2923_0514	152	TG	AC	85		100		16	8	85	52
454208_2923_0514	152	GC	CG	70		84		15	7	70	68
200198_2447_0575	153	AG	AG	53		63		11	5	53	90
200198_2447_0575	153	TC	AG	101		108		8	4	101	45
200595_3653_2195	153	AAG	AAG	80		99		20	6	80	54
200595_3653_2195	153	CTT	AAG	100		111		12	4	100	42
440690_1456_1021	153	GA	AG	53		60		8	4	53	93
440690_1456_1021	153	CT	AG	84		94		11	5	84	59
031814_1617_0642	154	TTCTTG	AACAAG	90		112		23	3	90	42
029911_2654_0799	155	TGT	AAC	43		112		70	23	43	43
047252_0179_3535	155	CAA	AAC	54		68		15	5	54	87
047252_0179_3535	155	GAC	ACG	70		81		12	4	70	74
047252_0179_3535	155	CGA	ACG	96		114		19	6	96	41
107298_2598_0472	155	CTT	AAG	71		90		20	6	71	65
118921_1281_3461	155	TGT	AAC	54		66		13	4	54	89
458950_2201_3276	155	TTC	AAG	47		63		17	5	47	92
458950_2201_3276	155	TTC	AAG	65		81		17	5	65	74
057591_1810_3220	156	CAA	AAC	40		53		14	4	40	103
057591_1810_3220	156	CAA	AAC	55		68		14	4	55	88
057591_1810_3220	156	GCAACA	AACAGC	69		89		21	3	69	67
057591_1810_3220	156	GCAACA	AACAGC	90		113		24	4	90	43
172686_2447_3033	156	CCA	ACC	95		115		21	7	95	41
175471_0961_3622	156	TAT	AAT	59		89		31	10	59	67
175471_0961_3622	156	TTA	AAT	91		116		26	8	91	40
034074_3943_0729	157	AC	AC	45		58		14	7	45	99
034074_3943_0729	157	GCAC	ACGC	67		82		16	4	67	75
274779_0909_3218	157	CAA	AAC	45		86		42	14	45	71
274779_0909_3218	157	AAC	AAC	88		100		13	4	88	57
077263_2158_2236	158	AGT	ACT	46		72		27	9	46	86
077263_2158_2236	158	GTA	ACT	87		103		17	5	87	55
077263_2158_2236	158	TAG	ACT	104		115		12	4	104	43
007224_1165_1261	159	AAC	AAC	58		100		43	14	58	59
089232_2573_2106	159	TTG	AAC	88		103		16	5	88	56
141380_2594_2637	159	TTC	AAG	42		55		14	4	42	104
141380_2594_2637	159	TTC	AAG	57		70		14	4	57	89
175220_2621_1716	159	TTC	AAG	42		55		14	4	42	104
175220_2621_1716	159	TTC	AAG	57		70		14	4	57	89
041750_2316_3096	160	TTC	AAG	42		55		14	4	42	105
041750_2316_3096	160	TTC	AAG	57		70		14	4	57	90
101562_2567_3636	160	CAA	AAC	72		104		33	11	72	56
155707_3316_2623	161	ACA	AAC	73		106		34	11	73	55
155707_3316_2623	161	CCA	ACC	61		72		12	4	61	89
021114_3892_2321	162	CAACAG	AACAGC	55		77		23	3	55	85
053784_3118_1480	162	GTT	AAC	89		101		13	4	89	61
053784_3118_1480	162	CTG	AGC	63		83		21	7	63	79
077486_1984_3674	162	ATT	AAT	41		103		63	21	41	59
121735_3813_2486	162	CAA	AAC	69		84		16	5	69	78
121735_3813_2486	162	ACA	AAC	86		100		15	5	86	62
084262_1731_2343	163	TTC	AAG	42		55		14	4	42	108
084262_1731_2343	163	TTC	AAG	57		70		14	4	57	93
120399_1016_0179	163	TGT	AAC	42		69		28	9	42	94
401209_1114_0103	163	AC	AC	49		62		14	7	49	101
401209_1114_0103	163	GCAC	ACGC	71		86		16	4	71	77
015595_0954_2279	164	CAA	AAC	43		78		36	12	43	86
108196_1415_2597	164	CTT	AAG	63		76		14	4	63	88
208597_3434_0214	164	ACA	AAC	48		86		39	13	48	78
212999_0179_1751	164	AG	AG	66		87		22	11	66	77
212999_0179_1751	164	GA	AG	91		105		15	7	91	59
295059_1977_1452	164	AAC	AAC	72		86		15	5	72	78
295059_1977_1452	164	TAC	ACT	87		107		21	7	87	57
319597_2185_3850	164	TG	AC	61		76		16	8	61	88
319597_2185_3850	164	TG	AC	79		88		10	5	79	76
319597_2185_3850	164	GTGC	ACGC	86		97		12	3	86	67
420016_2745_2449	164	GAGACA	ACAGAG	52		73		22	3	52	91
420016_2745_2449	164	AG	AG	69		81		13	6	69	83
420016_2745_2449	164	AG	AG	83		90		8	4	83	74
018426_0728_3363	165	AAT	AAT	60		79		20	6	60	86
071642_3999_3414	166	CAA	AAC	84		107		24	8	84	59
071642_3999_3414	166	AAC	AAC	109		125		17	5	109	41
078056_1459_1426	166	CTT	AAG	42		55		14	4	42	111
078056_1459_1426	166	TCT	AAG	62		101		40	13	62	65
212479_3386_2355	166	AAC	AAC	65		89		25	8	65	77
212479_3386_2355	166	AAC	AAC	91		113		23	7	91	53
021457_1185_1627	167	AAG	AAG	57		94		38	12	57	73
021457_1185_1627	167	AAG	AAG	101		112		12	4	101	55
067741_2548_1397	167	AC	AC	43		60		18	9	43	107
067741_2548_1397	167	CA	AC	116		123		8	4	116	44
067741_2548_1397	167	TC	AG	101		108		8	4	101	59
067741_2548_1397	167	C	C	75		82		8	8	75	85
060702_0278_0610	168	AAC	AAC	107		122		16	5	107	46
060702_0278_0610	168	TAC	ACT	71		106		36	12	71	62
139581_1303_3096	168	TTG	AAC	53		74		22	7	53	94
139581_1303_3096	168	TTGTCG	AACGAC	77		108		32	5	77	60
183774_1356_3248	168	AAC	AAC	59		77		19	6	59	91
183774_1356_3248	168	CAGCAA	AACAGC	94		113		20	3	94	55
040103_3857_3233	169	CAA	AAC	80		114		35	11	80	55
040103_3857_3233	169	ACAACC	AACCAC	40		62		23	3	40	107
173804_2739_0571	169	GT	AC	70		78		9	4	70	91
173804_2739_0571	169	GT	AC	87		96		10	5	87	73
173804_2739_0571	169	TG	AC	98		116		19	9	98	53
233918_3538_0588	169	GA	AG	77		128		52	26	77	41
008106_3016_2609	170	TGT	AAC	59		87		29	9	59	83
008106_3016_2609	170	TGT	AAC	89		105		17	5	89	65
008106_3016_2609	170	CTG	AGC	106		117		12	4	106	53
201939_2785_2671	171	TGT	AAC	61		76		16	5	61	95
201939_2785_2671	171	TTG	AAC	78		121		44	14	78	50
240836_0687_2153	171	CAA	AAC	53		72		20	6	53	99
240836_0687_2153	171	ACA	AAC	94		113		20	6	94	58
240836_0687_2153	171	CAC	ACC	77		93		17	5	77	78
103629_1336_3512	173	AAC	AAC	47		107		61	20	47	66
011494_1196_2016	174	GCA	AGC	45		56		12	4	45	118
020255_0945_0465	174	AAC	AAC	44		77		34	11	44	97
033678_0313_0926	174	GAAAG	AAAGG	48		71		24	4	48	103
033678_0313_0926	174	TG	AC	119		130		12	6	119	44
414377_3935_2233	174	AC	AC	56		132		77	38	56	42
071487_2739_2038	175	TTG	AAC	58		107		50	16	58	68
071487_2739_2038	175	TTG	AAC	109		125		17	5	109	50
087516_0616_2420	175	AG	AG	67		88		22	11	67	87
087516_0616_2420	175	GA	AG	92		106		15	7	92	69
281714_0233_0673	175	AC	AC	56		132		77	38	56	43
328758_0586_3510	175	TTG	AAC	43		54		12	4	43	121
328758_0586_3510	175	CTG	AGC	55		72		18	6	55	103
065196_1628_1997	176	TGT	AAC	71		132		62	20	71	44
225743_0295_3330	176	CAA	AAC	50		72		23	7	50	104
225743_0295_3330	176	AAC	AAC	87		100		14	4	87	76
264748_1503_2328	177	AAC	AAC	56		135		80	26	56	42
410605_2733_1088	177	CT	AG	69		87		19	9	69	90
381241_1144_1231	178	TA	AT	95		126		32	16	95	52
381241_1144_1231	178	AGAT	ATAG	58		94		37	9	58	84
006411_0425_1621	179	TTC	AAG	49		74		26	8	49	105
107189_2501_2796	179	GTG	ACC	42		59		18	6	42	120
177363_1475_3058	179	TGT	AAC	65		78		14	4	65	101
177363_1475_3058	179	TTG	AAC	109		123		15	5	109	56
064559_2199_3278	180	TTC	AAG	47		63		17	5	47	117
064559_2199_3278	180	TTC	AAG	65		81		17	5	65	99
275404_0905_2219	180	TGT	AAC	61		74		14	4	61	106
060347_1144_0667	182	TGT	AAC	53		66		14	4	53	116
136383_3096_0309	182	TAT	AAT	104		121		18	6	104	61
136383_3096_0309	182	CAC	ACC	59		72		14	4	59	110
183965_1647_2528	182	ACA	AAC	59		76		18	6	59	106
183965_1647_2528	182	CAA	AAC	96		109		14	4	96	73
007318_1164_1568	183	CAA	AAC	51		111		61	20	51	72
011771_1089_0837	183	TG	AC	47		55		9	4	47	128
011771_1089_0837	183	TG	AC	57		95		39	19	57	88
113291_1737_1091	183	ACA	AAC	61		91		31	10	61	92
113291_1737_1091	183	CCA	ACC	49		60		12	4	49	123
156066_1981_1361	183	GCTG	AGCC	64		75		12	3	64	108
402395_3185_3569	183	TG	AC	44		59		16	8	44	124
402395_3185_3569	183	TG	AC	70		77		8	4	70	106
402395_3185_3569	183	TG	AC	90		105		16	8	90	78
402395_3185_3569	183	GT	AC	133		143		11	5	133	40
402395_3185_3569	183	CG	CG	60		69		10	5	60	114
319740_3767_3153	184	A	A	83		90		8	8	83	94
047113_2577_3064	185	CAA	AAC	55		68		14	4	55	117
047113_2577_3064	185	AAC	AAC	89		113		25	8	89	72
016682_1577_2270	186	TGT	AAC	46		57		12	4	46	129
016682_1577_2270	186	TGT	AAC	63		130		68	22	63	56
017893_1404_0637	187	CAA	AAC	53		70		18	6	53	117
017893_1404_0637	187	CAA	AAC	111		124		14	4	111	63
017893_1404_0637	187	ACAGCA	AACAGC	127		147		21	3	127	40
135809_3111_3295	187	TTC	AAG	60		82		23	7	60	105
135809_3111_3295	187	TTCTTA	AATAAG	93		118		26	4	93	69
304169_1287_0174	188	AC	AC	46		65		20	10	46	123
304169_1287_0174	188	CA	AC	67		76		10	5	67	112
304169_1287_0174	188	AC	AC	100		110		11	5	100	78
304169_1287_0174	188	CT	AG	136		148		13	6	136	40
304169_1287_0174	188	TC	AG	86		99		14	7	86	89
146233_1229_0306	189	GA	AG	65		117		53	26	65	72
013670_1156_1597	190	CA	AC	76		83		8	4	76	107
064262_0055_1525	190	GC	CG	94		106		13	6	94	84
130498_3896_0316	190	AT	AT	95		126		32	16	95	64
202718_1951_2964	191	ACA	AAC	62		85		24	8	62	106
202718_1951_2964	191	CAA	AAC	87		100		14	4	87	91
202718_1951_2964	191	ACA	AAC	102		125		24	8	102	66
202718_1951_2964	191	ACA	AAC	127		147		21	7	127	44
264169_3205_0156	191	AAC	AAC	44		82		39	13	44	109
264169_3205_0156	191	CAACAG	AACAGC	115		137		23	3	115	54
264169_3205_0156	191	CAG	AGC	97		110		14	4	97	81
228124_3689_3836	192	TGT	AAC	67		115		49	16	67	77
406762_1921_2214	196	AAC	AAC	78		93		16	5	78	103
009394_1692_1298	199	TGTTGC	AACAGC	91		112		22	3	91	87
206947_2823_4001	199	TGT	AAC	48		79		32	10	48	120
206947_2823_4001	199	TGT	AAC	84		121		38	12	84	78
278000_3754_0247	199	AC	AC	40		51		12	6	40	148
230390_0828_3092	200	CAA	AAC	50		63		14	4	50	137
230390_0828_3092	200	CAA	AAC	92		117		26	8	92	83
230390_0828_3092	200	CAA	AAC	137		156		20	6	137	44
125824_1732_1222	201	AAC	AAC	52		134		83	27	52	67
210522_2740_3878	201	TAC	ACT	73		126		54	18	73	75
366113_1111_0800	201	TGT	AAC	50		128		79	26	50	73
114323_3931_1321	202	ACA	AAC	49		63		15	5	49	139
114323_3931_1321	202	CAA	AAC	80		112		33	11	80	90
164132_0893_1537	202	AAC	AAC	52		134		83	27	52	68
034983_2469_1967	203	AAC	AAC	63		89		27	9	63	114
034983_2469_1967	203	AACG	AACG	119		142		24	6	119	61
146925_1975_3135	203	TGT	AAC	44		55		12	4	44	148
146925_1975_3135	203	TTG	AAC	68		79		12	4	68	124
146925_1975_3135	203	TTG	AAC	104		118		15	5	104	85
146925_1975_3135	203	TGT	AAC	120		136		17	5	120	67
207556_2686_1116	203	TGT	AAC	96		133		38	12	96	70
207556_2686_1116	203	CTGTTG	AACAGC	134		155		22	3	134	48
211786_3517_3472	203	AC	AC	47		56		10	5	47	147
211786_3517_3472	203	CA	AC	83		91		9	4	83	112
211786_3517_3472	203	AC	AC	122		134		13	6	122	69
211786_3517_3472	203	TC	AG	147		158		12	6	147	45
211786_3517_3472	203	TC	AG	102		121		20	10	102	82
331111_1212_0420	204	T	A	63		70		8	8	63	134
049353_2803_2869	205	CACACG	ACACGC	58		92		35	5	58	113
049353_2803_2869	205	ACGC	ACGC	93		112		20	5	93	93
052806_2713_0728	206	AAC	AAC	68		102		35	11	68	104
052806_2713_0728	206	CAACAG	AACAGC	130		155		26	4	130	51
052806_2713_0728	206	ACC	ACC	41		65		25	8	41	141
328508_3279_0977	206	TC	AG	85		111		27	13	85	95
437716_3757_4019	206	AC	AC	112		124		13	6	112	82
437716_3757_4019	206	AT	AT	74		110		37	18	74	96
003322_1685_3158	207	ACA	AAC	130		142		13	4	130	65
026006_1616_3549	207	CTT	AAG	52		87		36	12	52	120
102823_3734_2548	208	ACA	AAC	52		109		58	19	52	99
102823_3734_2548	208	AAC	AAC	111		158		48	16	111	50
017365_3981_3766	209	TGT	AAC	61		72		12	4	61	137
017365_3981_3766	209	TTG	AAC	118		132		15	5	118	77
017365_3981_3766	209	TGT	AAC	134		146		13	4	134	63
186538_0854_2213	209	TGT	AAC	60		73		14	4	60	136
219833_2873_2542	209	ACA	AAC	40		53		14	4	40	156
219833_2873_2542	209	ACA	AAC	55		84		30	10	55	125
219833_2873_2542	209	CAA	AAC	104		141		38	12	104	68
231154_0810_0542	209	GC	CG	67		79		13	6	67	130
103471_0724_3202	210	GT	AC	42		64		23	11	42	146
190676_3828_1922	210	TTG	AAC	60		160		101	33	60	50
190676_3828_1922	210	GTG	ACC	45		59		15	5	45	151
465838_1052_2746	210	TA	AT	56		102		47	23	56	108
202592_3762_2126	211	CTT	AAG	89		121		33	11	89	90
202592_3762_2126	211	ATTCTT	AATAAG	65		88		24	4	65	123
008225_1380_1026	212	GA	AG	101		170		70	35	101	42
268458_3030_1675	212	GA	AG	97		131		35	17	97	81
268458_3030_1675	212	GA	AG	132		143		12	6	132	69
268458_3030_1675	212	AGCG	AGCG	75		92		18	4	75	120
023148_1465_0438	213	GT	AC	74		81		8	4	74	132
334032_3353_3142	213	AT	AT	79		86		8	4	79	127
334032_3353_3142	213	AT	AT	126		133		8	4	126	80
301370_0512_2145	214	CAA	AAC	42		56		15	5	42	158
301370_0512_2145	214	CAA	AAC	78		94		17	5	78	120
301370_0512_2145	214	CAA	AAC	126		151		26	8	126	63
301370_0512_2145	214	CAA	AAC	153		166		14	4	153	48
304807_3214_0983	214	TC	AG	85		111		27	13	85	103
347985_2788_3386	214	TG	AC	99		127		29	14	99	87
011625_0866_2841	217	GAGG	AGGG	70		88		19	4	70	129
116058_1068_0574	217	AAC	AAC	90		102		13	4	90	115
116058_1068_0574	217	AAC	AAC	117		162		46	15	117	55
116058_1068_0574	217	CAG	AGC	71		87		17	5	71	130
173819_1300_3011	217	ACA	AAC	105		119		15	5	105	98
193293_0636_2361	217	TA	AT	106		144		39	19	106	73
321937_0801_4030	217	CAT	ATC	104		126		23	7	104	91
211331_1451_0876	218	GC	CG	88		100		13	6	88	118
266704_0973_0585	218	TTC	AAG	109		170		62	20	109	48
266704_0973_0585	218	GT	AC	40		48		9	4	40	170
266704_0973_0585	218	TG	AC	63		72		10	5	63	146
105239_3936_0674	219	CAA	AAC	91		110		20	6	91	109
105239_3936_0674	219	CAA	AAC	125		144		20	6	125	75
105239_3936_0674	219	CAA	AAC	158		174		17	5	158	45
243178_1166_0469	219	AC	AC	66		81		16	8	66	138
243178_1166_0469	219	AC	AC	108		115		8	4	108	104
243178_1166_0469	219	AC	AC	146		154		9	4	146	65
243178_1166_0469	219	GCAC	ACGC	82		97		16	4	82	122
243178_1166_0469	219	TC	AG	168		177		10	5	168	42
243178_1166_0469	219	TC	AG	126		136		11	5	126	83
243178_1166_0469	219	TC	AG	138		145		8	4	138	74
243178_1166_0469	219	TC	AG	47		54		8	4	47	165
243178_1166_0469	219	CT	AG	55		65		11	5	55	154
365065_0874_4046	219	TGT	AAC	55		66		12	4	55	153
365065_0874_4046	219	TTG	AAC	79		90		12	4	79	129
365065_0874_4046	219	TTG	AAC	115		129		15	5	115	90
365065_0874_4046	219	TGT	AAC	131		144		14	4	131	75
365065_0874_4046	219	TGT	AAC	146		177		32	10	146	42
106320_2638_1342	220	AAC	AAC	49		103		55	18	49	117
106320_2638_1342	220	ACCAAC	AACACC	115		133		19	3	115	87
459492_2957_2477	220	TGT	AAC	101		152		52	17	101	68
459492_2957_2477	220	TGTTGC	AACAGC	47		64		18	3	47	156
058867_0532_0253	223	CAA	AAC	109		155		47	15	109	68
129251_0595_1597	223	ACA	AAC	53		76		24	8	53	147
129251_0595_1597	223	AAC	AAC	94		118		25	8	94	105
129251_0595_1597	223	CAA	AAC	120		133		14	4	120	90
129251_0595_1597	223	CAG	AGC	78		91		14	4	78	132
180253_3739_1884	223	TTG	AAC	109		126		18	6	109	97
180253_3739_1884	223	TGT	AAC	128		140		13	4	128	83
230040_1657_0548	223	AAC	AAC	56		152		97	32	56	71
268487_1188_0939	223	CAA	AAC	45		85		41	13	45	138
268487_1188_0939	223	CAA	AAC	93		104		12	4	93	119
268487_1188_0939	223	CAG	AGC	117		142		26	8	117	81
308792_3257_1794	223	C	C	89		97		9	9	89	126
411578_2657_2213	223	TC	AG	85		111		27	13	85	112
231727_4029_3045	224	CAA	AAC	135		166		32	10	135	58
200649_2473_0384	227	AAC	AAC	47		65		19	6	47	162
200649_2473_0384	227	CAA	AAC	94		174		81	27	94	53
226473_1273_2437	227	AG	AG	74		117		44	22	74	110
226473_1273_2437	227	GGAG	AGGG	120		156		37	9	120	71
211130_1261_1208	228	TTG	AAC	43		124		82	27	43	104
074922_0195_2581	230	CTT	AAG	87		102		16	5	87	128
074922_0195_2581	230	TCT	AAG	116		127		12	4	116	103
074922_0195_2581	230	CTTCTG	AAGCAG	132		154		23	3	132	76
149665_1286_2614	231	CAA	AAC	65		76		12	4	65	155
149665_1286_2614	231	ACA	AAC	89		100		12	4	89	131
149665_1286_2614	231	CAA	AAC	132		145		14	4	132	86
149665_1286_2614	231	CAA	AAC	159		184		26	8	159	47
261082_2310_2029	231	TGT	AAC	68		105		38	12	68	126
261082_2310_2029	231	GTG	ACC	106		126		21	7	106	105
305919_1723_1845	231	CAA	AAC	58		128		71	23	58	103
305919_1723_1845	231	ACA	AAC	130		141		12	4	130	90
305919_1723_1845	231	ACA	AAC	143		154		12	4	143	77
164462_3562_3605	235	CAA	AAC	50		123		74	24	50	112
182025_1815_1520	235	TTC	AAG	65		78		14	4	65	157
182025_1815_1520	235	TTC	AAG	80		119		40	13	80	116
182025_1815_1520	235	TCT	AAG	126		137		12	4	126	98
182025_1815_1520	235	TCT	AAG	140		159		20	6	140	76
182025_1815_1520	235	TCT	AAG	161		194		34	11	161	41
192163_2799_3615	235	ACA	AAC	113		155		43	14	113	80
192163_2799_3615	235	CAG	AGC	63		74		12	4	63	161
192163_2799_3615	235	CAT	ATC	96		112		17	5	96	123
006042_1089_1013	236	ACA	AAC	75		89		15	5	75	147
006042_1089_1013	236	CAA	AAC	91		104		14	4	91	132
006042_1089_1013	236	CAA	AAC	106		125		20	6	106	111
006042_1089_1013	236	CAA	AAC	142		182		41	13	142	54
006042_1089_1013	236	CAC	ACC	61		74		14	4	61	162
134803_2930_2990	237	TGT	AAC	74		131		58	19	74	106
134803_2930_2990	237	TGC	AGC	158		171		14	4	158	66
272779_3794_3135	237	GTT	AAC	56		78		23	7	56	159
272779_3794_3135	237	GTT	AAC	80		93		14	4	80	144
272779_3794_3135	237	GTT	AAC	95		108		14	4	95	129
272779_3794_3135	237	GTT	AAC	125		138		14	4	125	99
272779_3794_3135	237	GTT	AAC	140		153		14	4	140	84
076189_3681_0977	238	TTG	AAC	56		70		15	5	56	168
076189_3681_0977	238	TGT	AAC	72		93		22	7	72	145
076189_3681_0977	238	TTG	AAC	95		145		51	17	95	93
076189_3681_0977	238	TGT	AAC	147		175		29	9	147	63
314781_3927_2056	239	TTG	AAC	68		161		94	31	68	78
314781_3927_2056	239	TGT	AAC	163		189		27	9	163	50
314781_3927_2056	239	TGTTGC	AACAGC	45		67		23	3	45	172
231623_3642_3064	240	GCAACA	AACAGC	144		167		24	4	144	73
293937_0823_3266	241	CTT	AAG	57		70		14	4	57	171
293937_0823_3266	241	TTC	AAG	89		126		38	12	89	115
338218_2510_3797	242	TTG	AAC	42		80		39	13	42	162
338218_2510_3797	242	TGT	AAC	103		116		14	4	103	126
338218_2510_3797	242	TGT	AAC	118		131		14	4	118	111
338218_2510_3797	242	TGT	AAC	133		146		14	4	133	96
338218_2510_3797	242	TGT	AAC	148		161		14	4	148	81
005235_1337_2580	243	TGT	AAC	109		160		52	17	109	83
019726_1504_0467	243	CAA	AAC	125		136		12	4	125	107
271209_2183_1700	243	GAA	AAG	118		168		51	17	118	75
170471_0941_1126	244	CAA	AAC	94		128		35	11	94	116
170471_0941_1126	244	CAA	AAC	142		158		17	5	142	86
325245_2977_3336	244	CAA	AAC	68		81		14	4	68	163
325245_2977_3336	244	CAA	AAC	83		123		41	13	83	121
325245_2977_3336	244	AAC	AAC	137		158		22	7	137	86
325245_2977_3336	244	CAC	ACC	44		57		14	4	44	187
217534_1274_2906	247	TGTTGC	AACAGC	43		70		28	4	43	177
217534_1274_2906	247	TGTTGC	AACAGC	73		101		29	4	73	146
254817_1417_0182	247	TTG	AAC	42		80		39	13	42	167
254817_1417_0182	247	TGT	AAC	103		116		14	4	103	131
254817_1417_0182	247	TGT	AAC	118		131		14	4	118	116
254817_1417_0182	247	TGT	AAC	133		146		14	4	133	101
254817_1417_0182	247	TGT	AAC	148		161		14	4	148	86
077123_3190_1729	248	TTC	AAG	59		72		14	4	59	176
077123_3190_1729	248	TTC	AAG	74		91		18	6	74	157
077123_3190_1729	248	CTT	AAG	92		109		18	6	92	139
216535_1132_2266	248	ACA	AAC	156		179		24	8	156	69
216535_1132_2266	248	ACA	AAC	78		91		14	4	78	157
216535_1132_2266	248	AGCAAC	AACAGC	113		131		19	3	113	117
216535_1132_2266	248	CAACAG	AACAGC	133		155		23	3	133	93
216535_1132_2266	248	CAC	ACC	40		54		15	5	40	194
216535_1132_2266	248	ACC	ACC	59		77		19	6	59	171
353204_1190_0110	251	TGT	AAC	52		67		16	5	52	184
353204_1190_0110	251	TGT	AAC	106		193		88	29	106	58
353204_1190_0110	251	CTT	AAG	68		98		31	10	68	153
150492_0442_1385	252	CTT	AAG	123		137		15	5	123	115
162402_0887_0397	252	TGT	AAC	97		109		13	4	97	143
162402_0887_0397	252	TGT	AAC	114		155		42	14	114	97
162402_0887_0397	252	GTT	AAC	157		172		16	5	157	80
162402_0887_0397	252	GTG	ACC	63		74		12	4	63	178
055740_3125_1465	253	ACA	AAC	158		170		13	4	158	83
055740_3125_1465	253	CAA	AAC	174		190		17	5	174	63
055740_3125_1465	253	AAC	AAC	51		67		17	5	51	186
055740_3125_1465	253	AAC	AAC	69		115		47	15	69	138
055740_3125_1465	253	ACA	AAC	116		130		15	5	116	123
055740_3125_1465	253	CCA	ACC	131		157		27	9	131	96
238381_1975_3069	254	CAA	AAC	84		129		46	15	84	125
238381_1975_3069	254	ACA	AAC	131		147		17	5	131	107
238381_1975_3069	254	ACA	AAC	149		165		17	5	149	89
238381_1975_3069	254	ACA	AAC	167		183		17	5	167	71
311987_0835_3905	254	CAA	AAC	59		84		26	8	59	170
311987_0835_3905	254	CAA	AAC	122		139		18	6	122	115
435373_3572_1839	254	CTT	AAG	123		149		27	9	123	105
435373_3572_1839	254	TTA	AAT	88		122		35	11	88	132
105515_1646_3799	257	TTC	AAG	55		89		35	11	55	168
105515_1646_3799	257	ATT	AAT	90		119		30	10	90	138
105515_1646_3799	257	TTA	AAT	126		146		21	7	126	111
105515_1646_3799	257	TTA	AAT	159		205		47	15	159	52
116942_0809_2099	260	AAC	AAC	69		85		17	5	69	175
116942_0809_2099	260	AAC	AAC	87		106		20	6	87	154
004502_1171_3187	262	ACA	AAC	110		187		78	26	110	75
004502_1171_3187	262	CAA	AAC	69		80		12	4	69	182
004502_1171_3187	262	AAC	AAC	82		97		16	5	82	165
004502_1171_3187	262	CCA	ACC	98		109		12	4	98	153
185498_3217_2859	262	TGT	AAC	74		96		23	7	74	166
185498_3217_2859	262	TGT	AAC	122		139		18	6	122	123
185498_3217_2859	262	GTT	AAC	141		207		67	22	141	55
195604_3579_0069	263	TGT	AAC	78		91		14	4	78	172
195604_3579_0069	263	TGT	AAC	123		134		12	4	123	129
195604_3579_0069	263	TTG	AAC	146		157		12	4	146	106
195604_3579_0069	263	TTG	AAC	182		193		12	4	182	70
195604_3579_0069	263	TGT	AAC	198		210		13	4	198	53
072408_1092_3088	264	CTT	AAG	56		69		14	4	56	195
072408_1092_3088	264	CTT	AAG	71		87		17	5	71	177
072408_1092_3088	264	TCT	AAG	124		141		18	6	124	123
072408_1092_3088	264	TCT	AAG	150		170		21	7	150	94
072408_1092_3088	264	TCT	AAG	172		201		30	10	172	63
072408_1092_3088	264	TCT	AAG	203		221		19	6	203	43
072408_1092_3088	264	CTC	AGG	110		123		14	4	110	141
073588_1964_1294	268	TTC	AAG	72		91		20	6	72	177
106700_3471_2465	269	CAA	AAC	42		53		12	4	42	216
106700_3471_2465	269	AAC	AAC	55		79		25	8	55	190
106700_3471_2465	269	CAA	AAC	105		225		121	40	105	44
199827_1700_3583	271	TTG	AAC	105		155		51	17	105	116
199827_1700_3583	271	TGT	AAC	175		192		18	6	175	79
199827_1700_3583	271	CTGTTG	AACAGC	156		173		18	3	156	98
199827_1700_3583	271	GGT	ACC	86		98		13	4	86	173
030614_1009_1363	279	CAA	AAC	65		82		18	6	65	197
030614_1009_1363	279	AAC	AAC	84		227		144	48	84	52
120378_2568_3472	279	TGT	AAC	51		115		65	21	51	164
120378_2568_3472	279	TTG	AAC	139		153		15	5	139	126
120378_2568_3472	279	TGT	AAC	155		167		13	4	155	112
120378_2568_3472	279	TGT	AAC	170		213		44	14	170	66
120378_2568_3472	279	TGT	AAC	215		234		20	6	215	45
011615_1632_2872	282	CAAA	AAAC	62		75		14	3	62	207
011615_1632_2872	282	CAA	AAC	94		191		98	32	94	91
011615_1632_2872	282	CAA	AAC	192		203		12	4	192	79
011615_1632_2872	282	ACA	AAC	215		226		12	4	215	56
241922_0687_3520	283	GTC	ACG	75		109		35	11	75	174
174499_0457_0358	284	TCT	AAG	54		87		34	11	54	197
174499_0457_0358	284	TCT	AAG	180		222		43	14	180	62
174499_0457_0358	284	ATT	AAT	88		153		66	22	88	131
017972_3072_0588	285	GTC	ACG	75		109		35	11	75	176
322489_3542_2734	289	TTG	AAC	81		99		19	6	81	190
322489_3542_2734	289	GT	AC	100		107		8	4	100	182
235550_2187_3316	291	T	A	66		74		9	9	66	217
235550_2187_3316	291	TAGTAT	AATACT	153		176		24	4	153	115
235550_2187_3316	291	AGTATT	AATACT	177		236		60	10	177	55
235550_2187_3316	291	AGTAT	ATACT	138		152		15	3	138	139
264569_1445_1640	293	TTC	AAG	108		124		17	5	108	169
264569_1445_1640	293	TTC	AAG	126		163		38	12	126	130
264569_1445_1640	293	ATT	AAT	164		248		85	28	164	45
027783_1202_0291	421	T	A	105		124		20	20	105	297
027783_1202_0291	421	A	A	194		205		12	12	194	216
027783_1202_0291	421	A	A	252		261		10	10	252	160
027783_1202_0291	421	G	C	262		292		31	31	262	129
027783_1202_0291	421	C	C	303		313		11	11	303	108
027783_1202_0291	421	G	C	325		334		10	10	325	87
027783_1202_0291	421	G	C	338		348		11	11	338	73
027783_1202_0291	421	G	C	130		149		20	20	130	272
027783_1202_0291	421	C	C	154		171		18	18	154	250
027783_1202_0291	421	G	C	183		193		11	11	183	228
027783_1202_0291	421	C	C	60		70		11	11	60	351
124655_0752_0614	86	CG	CG	33		44		12	6	33	42
024086_3543_3989	87	AG	AG	41		55		15	7	41	32
105048_3193_2090	88	ACA	AAC	42		53		12	4	42	35
408118_0615_2845	88	TCT	AAG	31		44		14	4	31	44
474377_0060_0792	88	TTC	AAG	30		48		19	6	30	40
301458_2689_2173	89	TGT	AAC	40		53		14	4	40	36
053229_3576_1251	91	GTG	ACC	44		55		12	4	44	36
234846_1208_1700	91	TTG	AAC	37		51		15	5	37	40
065261_3996_1605	93	GT	AC	35		50		16	8	35	43
118744_3474_0803	93	GT	AC	35		50		16	8	35	43
023719_1816_2883	94	AG	AG	34		47		14	7	34	47
065310_2462_2641	94	CAG	AGC	43		56		14	4	43	38
118169_3684_4050	94	AG	AG	45		61		17	8	45	33
216657_1887_0861	94	AAC	AAC	30		43		14	4	30	51
162742_0892_1907	95	CT	AG	44		60		17	8	44	35
252131_1396_0254	95	TC	AG	53		64		12	6	53	31
269915_1970_2776	95	CA	AC	39		47		9	4	39	48
052611_1782_0884	97	CCA	ACC	34		45		12	4	34	52
148444_2017_1674	97	TG	AC	38		53		16	8	38	44
342727_3443_3459	97	GTG	ACC	35		46		12	4	35	51
019325_1133_1298	98	TTGCTG	AACAGC	42		65		24	4	42	33
223069_2400_3562	100	A	A	31		50		20	20	31	50
082796_2199_3186	101	CAA	AAC	34		56		23	7	34	45
352746_3202_2583	102	CTT	AAG	30		60		31	10	30	42
066504_0069_2146	103	AG	AG	32		48		17	8	32	55
113136_2233_0443	103	CT	AG	38		45		8	4	38	58
235191_2009_1004	103	AC	AC	36		44		9	4	36	59
235191_2009_1004	103	AC	AC	50		71		22	11	50	32
118596_0912_2102	104	TTG	AAC	31		48		18	6	31	56
241009_3371_0173	104	AGCAAC	AACAGC	53		74		22	3	53	30
359189_1223_2395	104	AG	AG	60		72		13	6	60	32
136414_3812_2928	105	TGT	AAC	31		52		22	7	31	53
435252_0744_2998	105	A	A	35		42		8	8	35	63
435252_0744_2998	105	TC	AG	60		74		15	7	60	31
023151_2803_3397	106	TGT	AAC	34		46		13	4	34	60
130328_0375_2965	106	AG	AG	32		48		17	8	32	58
320677_1032_0976	106	ACA	AAC	38		59		22	7	38	47
037993_1416_3852	107	GT	AC	30		38		9	4	30	69
139652_0957_3654	108	AGA	AAG	32		58		27	9	32	50
385652_0696_2922	108	TCT	AAG	51		77		27	9	51	31
073971_2408_2986	109	A	A	30		37		8	8	30	72
073971_2408_2986	109	CG	CG	65		76		12	6	65	33
329986_2791_2948	109	AG	AG	69		77		9	4	69	32
399843_3318_3041	109	ACA	AAC	37		58		22	7	37	51
125694_3380_2534	110	TGT	AAC	59		72		14	4	59	38
265764_1331_0373	110	TGT	AAC	39		58		20	6	39	52
079328_1870_3349	111	TGT	AAC	60		73		14	4	60	38
167150_1605_1033	112	TCT	AAG	34		47		14	4	34	65
308875_2676_2823	112	AG	AG	35		49		15	7	35	63
056980_3099_1746	113	GAC	ACG	62		82		21	7	62	31
091915_0827_2481	114	AAT	AAT	42		76		35	11	42	38
173495_0552_4011	114	CA	AC	33		46		14	7	33	68
224280_3274_2494	115	ATAG	ATAG	34		67		34	8	34	48
083150_1300_0146	116	TTGCTG	AACAGC	33		59		27	4	33	57
251373_3546_2857	116	CAA	AAC	66		79		14	4	66	37
012804_1982_1413	117	TGT	AAC	32		45		14	4	32	72
014332_1911_0413	117	AC	AC	37		74		38	19	37	43
337547_3711_2997	117	AG	AG	72		82		11	5	72	35
035740_2876_1067	118	TCT	AAG	36		51		16	5	36	67
035740_2876_1067	118	TTC	AAG	58		86		29	9	58	32
010787_1311_0264	119	ATT	AAT	33		76		44	14	33	43
041084_1195_1973	119	TGT	AAC	70		85		16	5	70	34
045870_0392_0690	119	CTT	AAG	36		59		24	8	36	60
126970_0974_0284	119	TCT	AAG	39		59		21	7	39	60
010457_0487_1795	121	GT	AC	30		38		9	4	30	83
129019_2898_1696	121	TTC	AAG	54		91		38	12	54	30
000691_3576_0239	123	GT	AC	30		38		9	4	30	85
018775_1213_2134	123	CAA	AAC	51		91		41	13	51	32
002274_1694_3661	124	TCT	AAG	39		55		17	5	39	69
002274_1694_3661	124	TCT	AAG	72		91		20	6	72	33
233103_0724_1526	124	GTGC	ACGC	33		51		19	4	33	73
295563_1526_3625	124	TTC	AAG	41		87		47	15	41	37
380477_1440_0040	124	GA	AG	39		55		17	8	39	69
013600_1590_1729	125	ACA	AAC	73		89		17	5	73	36
299541_3839_1927	125	TCT	AAG	31		61		31	10	31	64
012315_1215_0944	126	ACA	AAC	31		54		24	8	31	72
168263_1491_3266	126	AGAAGG	AAGGAG	38		65		28	4	38	61
168263_1491_3266	126	GAGAAG	AAGGAG	67		90		24	4	67	36
369947_0988_1990	126	GT	AC	32		42		11	5	32	84
408689_3763_3596	126	CA	AC	33		51		19	9	33	75
410976_1998_3334	127	TA	AT	48		91		44	22	48	36
004801_2308_1966	130	TTG	AAC	42		91		50	16	42	39
047018_0168_3032	130	AAG	AAG	30		48		19	6	30	82
158409_2335_2535	130	TGT	AAC	31		44		14	4	31	86
244264_3348_0185	130	TTA	AAT	56		100		45	15	56	30
006738_1174_0839	131	ACA	AAC	31		54		24	8	31	77
041505_2636_3918	131	TC	AG	80		97		18	9	80	34
130217_3000_0951	131	AAG	AAG	59		96		38	12	59	35
307856_2135_2514	131	AAC	AAC	47		99		53	17	47	32
049817_2282_3806	132	TGT	AAC	32		54		23	7	32	78
434084_0595_0604	132	GA	AG	35		61		27	13	35	71
434084_0595_0604	132	GAG	AGG	85		99		15	5	85	33
116602_1060_1910	133	AT	AT	82		97		16	8	82	36
149533_1412_0067	133	TTG	AAC	77		94		18	6	77	39
188424_2305_2096	133	TGT	AAC	39		76		38	12	39	57
188424_2305_2096	133	GTG	ACC	77		94		18	6	77	39
301504_3702_3211	133	GT	AC	34		43		10	5	34	90
144763_1277_0085	134	AAC	AAC	50		100		51	17	50	34
024237_1451_2980	135	ATT	AAT	38		84		47	15	38	51
267391_1749_2598	135	ACA	AAC	81		103		23	7	81	32
369237_1223_2694	135	CAA	AAC	39		62		24	8	39	73
088236_0792_1179	137	CAA	AAC	38		50		13	4	38	87
031373_3570_0392	138	CTT	AAG	33		67		35	11	33	71
066627_1941_0425	138	AAC	AAC	88		108		21	7	88	30
109542_1686_1419	138	CA	AC	32		52		21	10	32	86
138459_2250_3629	138	GA	AG	30		38		9	4	30	100
210715_1456_0809	138	CAA	AAC	74		105		32	10	74	33
368714_2549_1222	138	TCT	AAG	86		99		14	4	86	39
411457_3049_0595	138	AAC	AAC	42		100		59	19	42	38
274997_2369_3541	139	AAC	AAC	34		84		51	17	34	55
179436_0142_1249	140	GAGG	AGGG	34		50		17	4	34	90
393485_2409_0913	140	CAA	AAC	88		101		14	4	88	39
142756_2666_1780	141	GA	AG	85		102		18	9	85	39
165274_0345_2501	141	CTGTTG	AACAGC	33		50		18	3	33	91
146562_1379_1362	142	GGGA	AGGG	83		103		21	5	83	39
156005_1507_2266	142	CTT	AAG	35		60		26	8	35	82
232660_2230_3794	142	TG	AC	64		107		44	22	64	35
053007_2953_0997	143	AG	AG	32		54		23	11	32	89
018541_1453_2256	144	ACC	ACC	36		58		23	7	36	86
018541_1453_2256	144	TAC	ACT	68		111		44	14	68	33
024466_1324_2940	144	ATT	AAT	33		98		66	22	33	46
078441_1913_1375	144	AT	AT	37		68		32	16	37	76
434976_3895_0623	147	AAC	AAC	40		110		71	23	40	37
316795_0872_1049	148	AC	AC	102		110		9	4	102	38
012946_1338_1977	149	CTT	AAG	39		50		12	4	39	99
012946_1338_1977	149	CTT	AAG	102		113		12	4	102	36
198827_0451_0679	149	TTC	AAG	89		111		23	7	89	38
305203_1988_1644	149	CTCTT	AAGAG	31		47		17	3	31	102
305203_1988_1644	149	AAT	AAT	62		119		58	19	62	30
433575_0740_2492	150	AT	AT	38		45		8	4	38	105
433575_0740_2492	150	AT	AT	62		120		59	29	62	30
257519_1340_1295	151	AAC	AAC	55		121		67	22	55	30
403712_1227_2170	151	TTC	AAG	39		71		33	11	39	80
397039_1335_1533	152	TTC	AAG	34		56		23	7	34	96
006974_2444_0049	153	CAG	AGC	32		43		12	4	32	110
200198_2447_0575	153	TG	AC	37		52		16	8	37	101
200198_2447_0575	153	TC	AG	113		121		9	4	113	32
200595_3653_2195	153	AAG	AAG	35		72		38	12	35	81
440690_1456_1021	153	CT	AG	96		114		19	9	96	39
009744_3015_0298	154	TGT	AAC	39		68		30	10	39	86
187382_0220_2802	154	TTG	AAC	33		73		41	13	33	81
371788_1720_1526	154	TGT	AAC	31		47		17	5	31	107
243697_3333_0855	156	CTT	AAG	35		60		26	8	35	96
243697_3333_0855	156	TCT	AAG	73		126		54	18	73	30
034074_3943_0729	157	TC	AG	101		122		22	11	101	35
034074_3943_0729	157	CG	CG	34		44		11	5	34	113
198002_2992_1915	157	CTT	AAG	36		61		26	8	36	96
198002_2992_1915	157	TCT	AAG	74		127		54	18	74	30
274779_0909_3218	157	CAA	AAC	111		127		17	5	111	30
077263_2158_2236	158	TAG	ACT	33		44		12	4	33	114
007224_1165_1261	159	AAC	AAC	34		52		19	6	34	107
086794_1135_3266	159	CAA	AAC	35		48		14	4	35	111
089232_2573_2106	159	TTG	AAC	105		123		19	6	105	36
155707_3316_2623	161	AAC	AAC	108		123		16	5	108	38
021114_3892_2321	162	CAA	AAC	37		50		14	4	37	112
121735_3813_2486	162	ACA	AAC	32		55		24	8	32	107
401209_1114_0103	163	TC	AG	104		125		22	11	104	38
401209_1114_0103	163	CG	CG	38		48		11	5	38	115
108196_1415_2597	164	CTT	AAG	114		130		17	5	114	34
208597_3434_0214	164	CAA	AAC	103		127		25	8	103	37
420016_2745_2449	164	AG	AG	35		48		14	7	35	116
366277_3249_3405	165	CTGTTG	AACAGC	32		49		18	3	32	116
071642_3999_3414	166	CAG	AGC	39		55		17	5	39	111
173804_2739_0571	169	TG	AC	120		132		13	6	120	37
008106_3016_2609	170	TGT	AAC	35		48		14	4	35	122
071487_2739_2038	175	TGC	AGC	35		57		23	7	35	118
107189_2501_2796	179	TGT	AAC	115		140		26	8	115	39
275404_0905_2219	180	TGT	AAC	76		150		75	25	76	30
046507_3456_1441	181	GT	AC	34		66		33	16	34	115
136383_3096_0309	182	CAT	ATC	131		151		21	7	131	31
183965_1647_2528	182	CAA	AAC	129		148		20	6	129	34
113291_1737_1091	183	AGCAAC	AACAGC	93		147		55	9	93	36
012177_0932_1903	184	CA	AC	89		149		61	30	89	35
319740_3767_3153	184	TG	AC	33		40		8	4	33	144
356357_1645_1793	185	CAC	ACC	33		49		17	5	33	136
016682_1577_2270	186	TTG	AAC	137		153		17	5	137	33
088323_0216_1400	186	TTA	AAT	51		151		101	33	51	35
238235_1103_2770	186	TTC	AAG	53		153		101	33	53	33
135809_3111_3295	187	ATT	AAT	122		157		36	12	122	30
007545_4008_2369	188	CAA	AAC	35		55		21	7	35	133
304169_1287_0174	188	AC	AC	34		44		11	5	34	144
064262_0055_1525	190	AG	AG	33		42		10	5	33	148
202718_1951_2964	191	ACA	AAC	149		160		12	4	149	31
235397_1690_1809	192	CAA	AAC	59		153		95	31	59	39
406762_1921_2214	196	AAC	AAC	105		165		61	20	105	31
278000_3754_0247	199	TC	AG	30		37		8	4	30	162
125824_1732_1222	201	CAA	AAC	36		50		15	5	36	151
210522_2740_3878	201	AAC	AAC	127		163		37	12	127	38
114323_3931_1321	202	ACA	AAC	31		45		15	5	31	157
114323_3931_1321	202	AAC	AAC	114		168		55	18	114	34
164132_0893_1537	202	CAA	AAC	36		50		15	5	36	152
275552_0946_2978	202	GA	AG	132		165		34	17	132	37
146925_1975_3135	203	TGT	AAC	144		167		24	8	144	36
211786_3517_3472	203	CT	AG	159		170		12	6	159	33
211786_3517_3472	203	TC	AG	35		46		12	6	35	157
018027_1463_1772	205	TCT	AAG	38		52		15	5	38	153
049353_2803_2869	205	CA	AC	148		168		21	10	148	37
102823_3734_2548	208	ACA	AAC	34		50		17	5	34	158
017365_3981_3766	209	TGT	AAC	149		179		31	10	149	30
202592_3762_2126	211	TTC	AAG	39		64		26	8	39	147
023148_1465_0438	213	AAC	AAC	104		176		73	24	104	37
334032_3353_3142	213	ATGT	ATAC	33		47		15	3	33	166
301370_0512_2145	214	CAA	AAC	168		182		15	5	168	32
116058_1068_0574	217	CAA	AAC	35		46		12	4	35	171
105239_3936_0674	219	CAA	AAC	37		66		30	10	37	153
243178_1166_0469	219	CT	AG	178		188		11	5	178	31
365065_0874_4046	219	CTG	AGC	178		189		12	4	178	30
459492_2957_2477	220	GTT	AAC	154		189		36	12	154	31
129251_0595_1597	223	CAA	AAC	30		43		14	4	30	180
129251_0595_1597	223	CAA	AAC	144		190		47	15	144	33
231727_4029_3045	224	CAA	AAC	39		79		41	13	39	145
231727_4029_3045	224	CAG	AGC	171		193		23	7	171	31
074922_0195_2581	230	CTT	AAG	33		64		32	10	33	166
149665_1286_2614	231	CAA	AAC	186		197		12	4	186	34
164462_3562_3605	235	CAA	AAC	32		47		16	5	32	188
192163_2799_3615	235	CAG	AGC	30		47		18	6	30	188
134803_2930_2990	237	TGT	AAC	38		59		22	7	38	178
076189_3681_0977	238	TGT	AAC	37		55		19	6	37	183
363558_1947_3463	238	TTG	AAC	82		202		121	40	82	36
314781_3927_2056	239	CGT	ACG	190		201		12	4	190	38
293937_0823_3266	241	CTT	AAG	33		52		20	6	33	189
019726_1504_0467	243	AAC	AAC	30		45		16	5	30	198
325245_2977_3336	244	CAA	AAC	160		209		50	16	160	35
217534_1274_2906	247	TTG	AAC	102		217		116	38	102	30
077123_3190_1729	248	TTC	AAG	35		48		14	4	35	200
162402_0887_0397	252	TTG	AAC	30		62		33	11	30	190
311987_0835_3905	254	CAA	AAC	155		222		68	22	155	32
185498_3217_2859	262	TTG	AAC	37		48		12	4	37	214
195604_3579_0069	263	TGT	AAC	36		64		29	9	36	199
120378_2568_3472	279	TGT	AAC	33		46		14	4	33	233
027783_1202_0291	421	G	C	359		385		27	27	359	36
027783_1202_0291	421	C	C	32		46		15	15	32	375
326404_0612_0743	70	AC	AC	30		40		11	5	30	30
082806_1559_3767	71	GA	AG	33		41		9	4	33	30
256720_0734_3334	72	CT	AG	32		39		8	4	32	33
394748_3442_1080	74	TG	AC	37		44		8	4	37	30
489356_0997_3693	75	CT	AG	31		38		8	4	31	37
239112_1408_0912	76	TCC	AGG	34		45		12	4	34	31
338807_0659_2731	77	TA	AT	30		46		17	8	30	31
155199_0067_3568	78	CT	AG	30		45		16	8	30	33
277098_3397_1401	78	CG	CG	31		39		9	4	31	39
195908_1501_1686	79	AGG	AGG	31		43		13	4	31	36
048765_1989_2968	80	GA	AG	33		44		12	6	33	36
019337_0913_0262	81	AAC	AAC	35		50		16	5	35	31
070393_3396_0346	82	AAC	AAC	36		51		16	5	36	31
095253_1766_1610	82	CA	AC	31		44		14	7	31	38
126730_1581_3040	82	CT	AG	31		47		17	8	31	35
170604_1014_0914	82	GTT	AAC	38		51		14	4	38	31
194265_2832_2115	82	CG	CG	33		44		12	6	33	38
220474_2642_3325	84	TC	AG	38		45		8	4	38	39
221079_2253_2834	84	ACA	AAC	33		50		18	6	33	34
009694_1075_3389	91	ACA	AAC	31		54		24	8	31	37
314843_2261_1017	91	GTG	ACC	38		52		15	5	38	39
075144_1494_2911	93	TC	AG	35		60		26	13	35	33
111920_2567_1406	93	TGT	AAC	37		60		24	8	37	33
258619_0512_3080	97	CAA	AAC	31		62		32	10	31	35
186625_2501_1034	99	TGT	AAC	33		61		29	9	33	38
395293_2001_0660	105	CT	AG	34		71		38	19	34	34
397695_0058_3048	105	AC	AC	30		67		38	19	30	38
121669_1257_3798	106	CTT	AAG	38		76		39	13	38	30
006844_2542_2274	113	CAA	AAC	30		76		47	15	30	37
020891_1398_2063	135	ATT	AAT	33		98		66	22	33	37
001656_1593_0618	50	G	C	1		10		10	10	1	40
169407_1905_3201	50	TG	AC	41		50		10	5	41	0
382609_3870_1106	50	AT	AT	42		50		9	4	42	0
025214_1575_3094	51	AC	AC	40		50		11	5	40	1
059388_1384_1117	51	AC	AC	43		51		9	4	43	0
172635_3458_1260	51	TAG	ACT	40		51		12	4	40	0
323976_3204_3070	51	AG	AG	41		49		9	4	41	2
431368_2271_2236	51	TG	AC	1		11		11	5	1	40
431368_2271_2236	51	GT	AC	40		51		12	6	40	0
012074_1194_2591	52	TC	AG	45		52		8	4	45	0
210699_2936_2739	52	CAA	AAC	40		52		13	4	40	0
237304_3527_2504	52	TC	AG	1		9		9	4	1	43
327792_3224_1387	52	AC	AC	43		52		10	5	43	0
382628_0185_1986	53	CA	AC	1		11		11	5	1	42
382628_0185_1986	53	CA	AC	40		50		11	5	40	3
010447_1273_0553	54	TG	AC	44		53		10	5	44	1
012279_1164_1079	54	AC	AC	43		54		12	6	43	0
024897_1667_2377	54	AC	AC	46		54		9	4	46	0
024897_1667_2377	54	GA	AG	2		9		8	4	2	45
280400_3467_0751	54	GA	AG	1		13		13	6	1	41
291317_0805_2191	54	GT	AC	1		10		10	5	1	44
291317_0805_2191	54	GT	AC	45		54		10	5	45	0
365878_2924_3614	54	AG	AG	42		53		12	6	42	1
054003_0372_0173	55	AT	AT	1		11		11	5	1	44
218372_1723_3267	55	TG	AC	48		55		8	4	48	0
270008_1805_2835	55	CAA	AAC	1		15		15	5	1	40
362435_1674_1724	55	AG	AG	45		55		11	5	45	0
365258_3695_1416	55	AG	AG	45		55		11	5	45	0
376956_3736_0393	55	AG	AG	5		13		9	4	5	42
035761_2792_2581	56	AC	AC	47		56		10	5	47	0
097117_2836_1570	56	TCGT	AACG	44		56		13	3	44	0
161345_1417_2635	56	TC	AG	8		16		9	4	8	40
202262_3280_2573	56	AGC	AGC	1		13		13	4	1	43
215103_2383_3255	56	TGT	AAC	43		56		14	4	43	0
215103_2383_3255	56	GCT	AGC	2		14		13	4	2	42
262568_0648_1324	56	TG	AC	1		11		11	5	1	45
306417_0424_1873	56	AG	AG	1		15		15	7	1	41
322191_2837_1865	56	CA	AC	1		11		11	5	1	45
322191_2837_1865	56	CA	AC	41		51		11	5	41	5
327046_1369_3208	56	AG	AG	42		56		15	7	42	0
353514_2179_3830	56	TG	AC	1		12		12	6	1	44
019947_1456_3465	57	CT	AG	1		11		11	5	1	46
044516_2556_1524	57	TGC	AGC	41		57		17	5	41	0
089891_0926_2817	57	CT	AG	41		57		17	8	41	0
154218_1052_0241	57	TG	AC	1		12		12	6	1	45
165781_0055_3923	57	TC	AG	1		10		10	5	1	47
165781_0055_3923	57	CT	AG	45		57		13	6	45	0
172054_3114_2616	57	AGA	AAG	40		57		18	6	40	0
353348_2608_0701	57	TGG	ACC	1		15		15	5	1	42
353478_2989_2898	57	CA	AC	1		12		12	6	1	45
358881_1304_3076	57	ACA	AAC	41		57		17	5	41	0
406991_0762_3724	57	TACA	ATAC	1		16		16	4	1	41
017492_1181_1097	58	CA	AC	49		58		10	5	49	0
062506_1993_1287	58	GGAG	AGGG	44		58		15	3	44	0
085546_0121_2241	58	TGT	AAC	1		15		15	5	1	43
097763_3208_2114	58	CTT	AAG	43		58		16	5	43	0
159174_3472_0150	58	GTA	ACT	1		14		14	4	1	44
163736_3419_0234	58	G	C	48		57		10	10	48	1
191254_3152_1179	58	TC	AG	48		58		11	5	48	0
197954_0088_3623	58	GT	AC	50		58		9	4	50	0
305858_1338_2293	58	CAC	ACC	5		18		14	4	5	40
364539_3019_2346	58	AG	AG	1		15		15	7	1	43
479557_0292_3566	58	AGG	AGG	46		57		12	4	46	1
006729_0845_2234	59	AG	AG	48		55		8	4	48	4
014736_1414_3534	59	AG	AG	48		59		12	6	48	0
042204_1343_1019	59	GGGGA	AGGGG	1		16		16	3	1	43
095770_1033_1091	59	ACA	AAC	1		18		18	6	1	41
198467_0242_0563	59	AGG	AGG	2		13		12	4	2	46
210305_0708_0443	59	AG	AG	1		19		19	9	1	40
263004_3942_1336	59	TTG	AAC	45		59		15	5	45	0
301867_2279_1170	59	AT	AT	44		59		16	8	44	0
365005_0784_1829	59	AGA	AAG	44		55		12	4	44	4
381506_0239_2733	59	AG	AG	43		59		17	8	43	0
408173_0161_2015	59	CA	AC	47		59		13	6	47	0
408173_0161_2015	59	C	C	7		19		13	13	7	40
040613_3696_3605	60	GT	AC	51		60		10	5	51	0
058136_2505_1915	60	AAC	AAC	1		16		16	5	1	44
149148_1038_2241	60	TGT	AAC	45		56		12	4	45	4
259943_0528_3671	60	AAG	AAG	47		60		14	4	47	0
338829_2763_1088	60	GA	AG	51		58		8	4	51	2
398374_2844_3490	60	TG	AC	44		60		17	8	44	0
412920_2660_3910	60	GTG	ACC	48		59		12	4	48	1
004874_0860_1395	61	CTT	AAG	43		61		19	6	43	0
006917_2559_2915	61	AAG	AAG	2		14		13	4	2	47
059668_3256_0806	61	TGT	AAC	9		21		13	4	9	40
073669_2336_2215	61	TCC	AGG	1		14		14	4	1	47
078792_2530_2128	61	GGAA	AAGG	40		54		15	3	40	7
078792_2530_2128	61	AG	AG	3		13		11	5	3	48
144387_2165_0994	61	TG	AC	48		61		14	7	48	0
149257_2990_2931	61	GT	AC	2		11		10	5	2	50
167813_3963_2097	61	CA	AC	53		61		9	4	53	0
167813_3963_2097	61	TC	AG	10		21		12	6	10	40
169003_0665_1119	61	GT	AC	51		61		11	5	51	0
169003_0665_1119	61	GC	CG	7		17		11	5	7	44
199000_0380_2617	61	GTT	AAC	1		16		16	5	1	45
246506_0162_2557	61	T	A	52		59		8	8	52	2
281552_3111_4039	61	TGT	AAC	45		61		17	5	45	0
301560_1781_3835	61	CTA	ACT	1		19		19	6	1	42
334199_3056_2315	61	GA	AG	1		16		16	8	1	45
349933_1298_1786	61	GA	AG	1		8		8	4	1	53
349933_1298_1786	61	AG	AG	10		20		11	5	10	41
349933_1298_1786	61	AG	AG	40		57		18	9	40	4
467883_0896_0064	61	TA	AT	41		59		19	9	41	2
042868_1442_1275	62	GAGG	AGGG	5		19		15	3	5	43
109577_1686_2007	62	AC	AC	43		60		18	9	43	2
109905_2371_3738	62	GTT	AAC	1		16		16	5	1	46
109905_2371_3738	62	TGT	AAC	48		59		12	4	48	3
137710_3152_1261	62	AT	AT	1		13		13	6	1	49
183597_3711_0049	62	CAA	AAC	1		20		20	6	1	42
300894_3182_1018	62	GT	AC	1		13		13	6	1	49
362463_0140_0505	62	CAA	AAC	44		62		19	6	44	0
362463_0140_0505	62	ACC	ACC	1		13		13	4	1	49
441633_3039_2891	62	GT	AC	1		11		11	5	1	51
456536_1575_0436	62	AC	AC	5		22		18	9	5	40
001729_0643_2596	63	TTC	AAG	48		63		16	5	48	0
002827_1388_3085	63	TTG	AAC	1		12		12	4	1	51
013879_2796_2068	63	TGG	ACC	5		21		17	5	5	42
014575_1085_3108	63	CAA	AAC	45		63		19	6	45	0
070726_0754_1999	63	AC	AC	1		17		17	8	1	46
176365_1002_0100	63	CAA	AAC	1		14		14	4	1	49
385787_1126_0079	63	AG	AG	4		20		17	8	4	43
412108_3966_3532	63	TG	AC	1		14		14	7	1	49
066766_2791_1092	64	TG	AC	1		11		11	5	1	53
082074_2694_2397	64	GT	AC	53		64		12	6	53	0
117429_1790_3461	64	TCT	AAG	49		62		14	4	49	2
168943_3095_2626	64	TGTGC	ACAGC	48		64		17	3	48	0
191269_1816_2388	64	GTT	AAC	1		19		19	6	1	45
284848_2745_3783	64	CAA	AAC	40		64		25	8	40	0
284848_2745_3783	64	ACG	ACG	4		17		14	4	4	47
287514_2619_3451	64	CTT	AAG	1		24		24	8	1	40
012829_0970_1837	65	GAA	AAG	1		20		20	6	1	45
012829_0970_1837	65	GAA	AAG	43		65		23	7	43	0
023418_1263_2481	65	CAA	AAC	53		65		13	4	53	0
029115_2263_0276	65	TCT	AAG	13		24		12	4	13	41
094963_0488_1927	65	GTT	AAC	47		65		19	6	47	0
094963_0488_1927	65	GTT	AAC	1		24		24	8	1	41
095198_0951_2379	65	GAGG	AGGG	8		22		15	3	8	43
099385_3776_1423	65	GTT	AAC	48		64		17	5	48	1
112668_0198_1117	65	TCT	AAG	1		13		13	4	1	52
121469_2287_2672	65	GA	AG	55		64		10	5	55	1
130419_3452_0041	65	CAA	AAC	1		14		14	4	1	51
130419_3452_0041	65	CAA	AAC	52		65		14	4	52	0
144200_1084_2023	65	GA	AG	1		8		8	4	1	57
144200_1084_2023	65	AG	AG	10		18		9	4	10	47
155793_0443_0966	65	ATT	AAT	1		24		24	8	1	41
186393_3184_0093	65	TG	AC	1		20		20	10	1	45
194618_1908_1474	65	GT	AC	18		25		8	4	18	40
194618_1908_1474	65	GT	AC	46		65		20	10	46	0
257491_0809_1326	65	GA	AG	9		22		14	7	9	43
260904_3101_4020	65	TGT	AAC	49		65		17	5	49	0
293216_0589_2558	65	TA	AT	5		20		16	8	5	45
407874_1403_2239	65	GT	AC	52		65		14	7	52	0
007697_0848_3662	66	AAC	AAC	1		21		21	7	1	45
057951_0636_3438	66	TA	AT	2		10		9	4	2	56
057951_0636_3438	66	TA	AT	48		55		8	4	48	11
133628_1332_3764	66	TC	AG	12		22		11	5	12	44
174940_1837_2802	66	GA	AG	10		20		11	5	10	46
219245_0351_2572	66	CA	AC	43		54		12	6	43	12
281825_3681_2598	66	AG	AG	42		64		23	11	42	2
309265_2755_3857	66	G	C	44		51		8	8	44	15
309265_2755_3857	66	G	C	54		63		10	10	54	3
490977_1762_1709	66	AT	AT	43		54		12	6	43	12
490977_1762_1709	66	TA	AT	4		11		8	4	4	55
032065_1343_0693	67	CAA	AAC	54		67		14	4	54	0
032065_1343_0693	67	ACC	ACC	1		13		13	4	1	54
055279_2981_1149	67	CA	AC	4		12		9	4	4	55
055279_2981_1149	67	AC	AC	43		53		11	5	43	14
064264_3108_0517	67	TC	AG	13		23		11	5	13	44
077323_2210_3132	67	GTT	AAC	1		23		23	7	1	44
105763_2621_1011	67	TCT	AAG	13		24		12	4	13	43
146106_1386_1861	67	CAA	AAC	4		25		22	7	4	42
234743_2230_2317	67	AG	AG	7		16		10	5	7	51
271234_2751_3201	67	AAC	AAC	1		13		13	4	1	54
293484_1005_2139	67	GTT	AAC	50		66		17	5	50	1
371855_0388_1127	67	AGGGG	AGGGG	1		19		19	3	1	48
374585_0800_2452	67	GA	AG	20		27		8	4	20	40
414895_3126_2652	67	GTA	ACT	55		67		13	4	55	0
472040_0272_0498	67	GT	AC	54		63		10	5	54	4
472040_0272_0498	67	GCGTGT	ACACGC	40		58		19	3	40	9
484298_2164_1954	67	GA	AG	1		12		12	6	1	55
007634_1146_0860	68	TA	AT	1		24		24	12	1	44
025713_3848_1520	68	TC	AG	57		68		12	6	57	0
029359_1392_0650	68	CA	AC	1		8		8	4	1	60
029359_1392_0650	68	AG	AG	10		22		13	6	10	46
040572_3867_2087	68	GA	AG	7		15		9	4	7	53
042691_1504_3697	68	GT	AC	3		13		11	5	3	55
050641_1572_2372	68	AG	AG	55		68		14	7	55	0
054688_3104_2050	68	TGT	AAC	10		23		14	4	10	45
054688_3104_2050	68	TGT	AAC	40		68		29	9	40	0
080444_0879_0318	68	GA	AG	7		15		9	4	7	53
099590_1218_0831	68	TCT	AAG	13		24		12	4	13	44
122428_2649_1780	68	CA	AC	51		68		18	9	51	0
169251_2853_2362	68	AT	AT	1		12		12	6	1	56
286582_2983_3747	68	AAC	AAC	41		53		13	4	41	15
294831_1018_1713	68	TG	AC	8		17		10	5	8	51
037523_2589_0931	69	AACG	AACG	54		69		16	4	54	0
086659_1451_1091	69	TGT	AAC	4		29		26	8	4	40
124323_1491_3231	69	AAC	AAC	52		69		18	6	52	0
239783_0686_2466	69	TTG	AAC	40		69		30	10	40	0
241655_1447_1387	69	GGA	AGG	51		63		13	4	51	6
304197_1598_2111	69	AAC	AAC	50		68		19	6	50	1
304197_1598_2111	69	AGC	AGC	2		14		13	4	2	55
398181_3984_0731	69	TTC	AAG	1		14		14	4	1	55
398181_3984_0731	69	CTT	AAG	16		27		12	4	16	42
398181_3984_0731	69	TCT	AAG	51		63		13	4	51	6
422274_1842_0058	69	TA	AT	17		27		11	5	17	42
020737_0562_1054	70	TG	AC	4		19		16	8	4	51
035537_1827_2862	70	CAA	AAC	6		19		14	4	6	51
052502_3947_3307	70	GT	AC	55		65		11	5	55	5
174437_3736_1078	70	TGTTGC	AACAGC	43		69		27	4	43	1
213013_4005_2292	70	TCT	AAG	1		23		23	7	1	47
288534_0887_2167	70	TG	AC	62		70		9	4	62	0
326404_0612_0743	70	AC	AC	41		68		28	14	41	2
326404_0612_0743	70	TC	AG	18		29		12	6	18	41
000653_0948_2720	71	TC	AG	43		51		9	4	43	20
000653_0948_2720	71	TC	AG	53		71		19	9	53	0
077705_3360_3515	71	TTGCTG	AACAGC	51		69		19	3	51	2
082806_1559_3767	71	GT	AC	5		21		17	8	5	50
082806_1559_3767	71	AG	AG	22		31		10	5	22	40
082806_1559_3767	71	GA	AG	45		69		25	12	45	2
104467_1442_1341	71	TA	AT	48		71		24	12	48	0
148780_0546_0715	71	TCT	AAG	1		12		12	4	1	59
197496_1538_1581	71	GA	AG	1		18		18	9	1	53
197496_1538_1581	71	AG	AG	59		69		11	5	59	2
197496_1538_1581	71	GAGG	AGGG	43		58		16	4	43	13
203503_3691_3267	71	CAA	AAC	1		15		15	5	1	56
294119_0255_1500	71	TTACT	AAAGT	55		70		16	3	55	1
413378_2188_3230	71	TTG	AAC	11		31		21	7	11	40
413378_2188_3230	71	TGT	AAC	57		71		15	5	57	0
042389_3978_2552	72	TG	AC	44		72		29	14	44	0
069504_1316_3074	72	ACA	AAC	50		72		23	7	50	0
137987_0891_2840	72	TCT	AAG	1		23		23	7	1	49
137987_0891_2840	72	TCT	AAG	49		62		14	4	49	10
209021_0315_0066	72	TTG	AAC	1		15		15	5	1	57
252767_2284_1049	72	CAA	AAC	18		32		15	5	18	40
255907_3817_2368	72	AAC	AAC	40		72		33	11	40	0
256720_0734_3334	72	AC	AC	55		70		16	8	55	2
256720_0734_3334	72	GA	AG	1		8		8	4	1	64
256720_0734_3334	72	TC	AG	41		54		14	7	41	18
280562_1180_1596	72	CA	AC	1		11		11	5	1	61
280562_1180_1596	72	CA	AC	40		50		11	5	40	22
280562_1180_1596	72	CA	AC	65		72		8	4	65	0
325525_1007_1324	72	GAGG	AGGG	54		68		15	3	54	4
325525_1007_1324	72	CG	CG	16		25		10	5	16	47
452519_2434_2656	72	CT	AG	12		21		10	5	12	51
019190_0759_1536	73	GA	AG	50		73		24	12	50	0
022207_1182_3455	73	TAA	AAT	1		18		18	6	1	55
026283_1200_2685	73	GT	AC	1		19		19	9	1	54
067750_3908_0203	73	TTG	AAC	50		66		17	5	50	7
078648_1034_1552	73	GTT	AAC	50		62		13	4	50	11
227124_3006_1645	73	AT	AT	52		66		15	7	52	7
233346_1178_1703	73	TTG	AAC	51		67		17	5	51	6
270138_0754_0132	73	ACA	AAC	9		25		17	5	9	48
270138_0754_0132	73	ACA	AAC	45		72		28	9	45	1
301445_0274_1929	73	CAA	AAC	58		73		16	5	58	0
345425_0303_3153	73	ACA	AAC	51		73		23	7	51	0
412205_2172_1645	73	TG	AC	60		68		9	4	60	5
010257_2500_1966	74	CAG	AGC	6		31		26	8	6	43
010257_2500_1966	74	CAG	AGC	45		56		12	4	45	18
013553_3599_1674	74	AG	AG	14		24		11	5	14	50
013553_3599_1674	74	GA	AG	51		65		15	7	51	9
034083_0300_1768	74	AG	AG	1		9		9	4	1	65
034083_0300_1768	74	AG	AG	11		21		11	5	11	53
066401_0267_0329	74	ACA	AAC	47		64		18	6	47	10
071462_2315_1650	74	AGAA	AAAG	1		19		19	4	1	55
088980_1584_2682	74	TCG	ACG	1		28		28	9	1	46
114699_0072_2603	74	CAA	AAC	58		74		17	5	58	0
114699_0072_2603	74	CAG	AGC	4		20		17	5	4	54
194301_3855_0985	74	CAA	AAC	1		14		14	4	1	60
194301_3855_0985	74	CAA	AAC	16		32		17	5	16	42
194301_3855_0985	74	AAC	AAC	47		67		21	7	47	7
208711_2807_3484	74	TTG	AAC	8		20		13	4	8	54
208711_2807_3484	74	TGT	AAC	48		61		14	4	48	13
251196_1448_3383	74	TG	AC	2		11		10	5	2	63
251196_1448_3383	74	TG	AC	47		63		17	8	47	11
259015_1893_3056	74	AG	AG	6		13		8	4	6	61
263413_0707_1283	74	TGG	ACC	9		34		26	8	9	40
357181_1202_4044	74	GT	AC	66		74		9	4	66	0
357181_1202_4044	74	GT	AC	16		33		18	9	16	41
357181_1202_4044	74	TC	AG	47		65		19	9	47	9
388704_1038_3378	74	TTG	AAC	50		66		17	5	50	8
392566_0256_3544	74	AAG	AAG	17		33		17	5	17	41
392566_0256_3544	74	AGA	AAG	52		66		15	5	52	8
394748_3442_1080	74	GT	AC	10		22		13	6	10	52
394748_3442_1080	74	GA	AG	49		57		9	4	49	17
394748_3442_1080	74	GA	AG	62		74		13	6	62	0
435762_0272_1843	74	TTC	AAG	63		74		12	4	63	0
463601_3910_0201	74	TGT	AAC	53		65		13	4	53	9
469879_3155_1950	74	TCT	AAG	1		13		13	4	1	61
469879_3155_1950	74	TTC	AAG	43		59		17	5	43	15
000594_1965_2406	75	CA	AC	67		75		9	4	67	0
015487_1320_0544	75	AAC	AAC	1		20		20	6	1	55
034264_3299_1364	75	GTT	AAC	1		26		26	8	1	49
163581_0431_0936	75	AGA	AAG	19		35		17	5	19	40
163581_0431_0936	75	AG	AG	45		75		31	15	45	0
170935_0946_2353	75	ACG	ACG	6		31		26	8	6	44
243747_3895_1426	75	CA	AC	13		27		15	7	13	48
243747_3895_1426	75	AC	AC	47		75		29	14	47	0
250512_3405_0236	75	TGT	AAC	59		75		17	5	59	0
250618_0515_0151	75	AG	AG	11		21		11	5	11	54
250618_0515_0151	75	AG	AG	47		75		29	14	47	0
262938_1047_3662	75	TTG	AAC	1		27		27	9	1	48
272767_3412_0577	75	TGG	ACC	9		34		26	8	9	41
305622_0190_1384	75	TCT	AAG	44		57		14	4	44	18
420015_1563_3728	75	AG	AG	1		15		15	7	1	60
420015_1563_3728	75	GA	AG	60		75		16	8	60	0
441803_0736_1967	75	AG	AG	54		75		22	11	54	0
474653_3577_3373	75	AC	AC	8		20		13	6	8	55
474653_3577_3373	75	AC	AC	22		34		13	6	22	41
474653_3577_3373	75	AG	AG	59		68		10	5	59	7
489356_0997_3693	75	AC	AC	66		75		10	5	66	0
489356_0997_3693	75	TC	AG	40		51		12	6	40	24
489356_0997_3693	75	CT	AG	53		65		13	6	53	10
000401_1407_0407	76	TCT	AAG	1		29		29	9	1	47
000401_1407_0407	76	TTC	AAG	48		71		24	8	48	5
013237_1701_2503	76	AGA	AAG	54		70		17	5	54	6
020863_0954_3463	76	AGA	AAG	49		61		13	4	49	15
025127_3501_1586	76	TCT	AAG	54		76		23	7	54	0
063357_0047_1514	76	ACG	ACG	12		28		17	5	12	48
067569_0049_2030	76	AG	AG	46		76		31	15	46	0
086238_3337_0902	76	GT	AC	9		20		12	6	9	56
086238_3337_0902	76	AG	AG	56		69		14	7	56	7
096839_0097_1486	76	GTT	AAC	4		15		12	4	4	61
145826_3425_1961	76	TTG	AAC	42		72		31	10	42	4
215246_1101_3267	76	ACA	AAC	63		76		14	4	63	0
215246_1101_3267	76	AGCAAC	AACAGC	5		26		22	3	5	50
223493_0309_3733	76	CAC	ACC	1		20		20	6	1	56
239077_3041_0507	76	AC	AC	55		62		8	4	55	14
239077_3041_0507	76	CG	CG	64		72		9	4	64	4
239112_1408_0912	76	TCC	AGG	3		14		12	4	3	62
239112_1408_0912	76	TCC	AGG	58		72		15	5	58	4
248596_2246_1162	76	GT	AC	4		27		24	12	4	49
393114_1746_1068	76	AG	AG	48		76		29	14	48	0
002580_0077_2672	77	AGA	AAG	1		13		13	4	1	64
002580_0077_2672	77	TCT	AAG	22		34		13	4	22	43
002580_0077_2672	77	TTC	AAG	41		66		26	8	41	11
022619_3642_1321	77	AC	AC	17		25		9	4	17	52
031063_2691_0202	77	TGT	AAC	60		74		15	5	60	3
036647_3721_2785	77	TTC	AAG	1		25		25	8	1	52
091244_1984_3862	77	GT	AC	66		77		12	6	66	0
140592_0225_0630	77	GT	AC	53		76		24	12	53	1
271766_2806_2804	77	CAA	AAC	62		76		15	5	62	1
271766_2806_2804	77	CAGCAA	AACAGC	2		21		20	3	2	56
280619_1280_3883	77	TG	AC	41		52		12	6	41	25
280619_1280_3883	77	GT	AC	57		77		21	10	57	0
280619_1280_3883	77	GA	AG	4		15		12	6	4	62
281768_2323_1729	77	AG	AG	1		15		15	7	1	62
281768_2323_1729	77	GA	AG	60		77		18	9	60	0
302731_0332_3258	77	TTG	AAC	45		77		33	11	45	0
338807_0659_2731	77	AT	AT	1		28		28	14	1	49
338807_0659_2731	77	TA	AT	48		77		30	15	48	0
397413_3418_3216	77	GAA	AAG	56		75		20	6	56	2
443740_1872_1630	77	AAC	AAC	54		77		24	8	54	0
110847_2641_1369	78	TTG	AAC	1		24		24	8	1	54
110847_2641_1369	78	TGT	AAC	53		78		26	8	53	0
155199_0067_3568	78	GT	AC	46		77		32	16	46	1
186499_3103_2026	78	TGT	AAC	15		28		14	4	15	50
255259_0286_3786	78	TTG	AAC	53		78		26	8	53	0
277098_3397_1401	78	AC	AC	10		25		16	8	10	53
277098_3397_1401	78	AC	AC	40		52		13	6	40	26
277098_3397_1401	78	GA	AG	53		68		16	8	53	10
386870_1200_3012	78	TCT	AAG	2		26		25	8	2	52
386870_1200_3012	78	TCT	AAG	49		62		14	4	49	16
386870_1200_3012	78	TCT	AAG	64		75		12	4	64	3
409187_0788_2617	78	TATC	ATAG	2		13		12	3	2	65
409187_0788_2617	78	CTAT	ATAG	61		76		16	4	61	2
030546_1531_0581	79	GTT	AAC	1		16		16	5	1	63
042263_2725_0665	79	TG	AC	1		11		11	5	1	68
042263_2725_0665	79	TA	AT	13		31		19	9	13	48
047277_1508_0820	79	TGT	AAC	51		62		12	4	51	17
047773_1972_1848	79	GA	AG	58		79		22	11	58	0
047773_1972_1848	79	GAG	AGG	2		24		23	7	2	55
079890_0097_0706	79	CA	AC	1		15		15	7	1	64
114448_2368_0938	79	AAC	AAC	1		38		38	12	1	41
114448_2368_0938	79	AAC	AAC	40		64		25	8	40	15
156928_3181_4051	79	CAA	AAC	58		79		22	7	58	0
157696_3322_1920	79	CAA	AAC	1		24		24	8	1	55
166725_0277_0689	79	ACA	AAC	23		34		12	4	23	45
166725_0277_0689	79	AACAGC	AACAGC	1		22		22	3	1	57
172565_1060_0304	79	TGT	AAC	3		16		14	4	3	63
172565_1060_0304	79	TG	AC	60		71		12	6	60	8
195908_1501_1686	79	AGA	AAG	65		78		14	4	65	1
195908_1501_1686	79	AGG	AGG	7		26		20	6	7	53
198483_3531_1475	79	ACA	AAC	56		70		15	5	56	9
252026_1949_2867	79	AT	AT	1		24		24	12	1	55
303274_3258_1305	79	CAA	AAC	12		28		17	5	12	51
495976_2424_1167	79	GAA	AAG	47		62		16	5	47	17
495976_2424_1167	79	AGAAGG	AAGGAG	1		29		29	4	1	50
012550_3059_0812	80	AG	AG	25		33		9	4	25	47
015113_1117_3282	80	GAG	AGG	68		80		13	4	68	0
048765_1989_2968	80	AGAGA	AAGAG	4		18		15	3	4	62
048765_1989_2968	80	GA	AG	1		8		8	4	1	72
048765_1989_2968	80	AG	AG	14		21		8	4	14	59
050340_0209_1416	80	AGC	AGC	16		28		13	4	16	52
053001_3663_1070	80	TG	AC	1		27		27	13	1	53
077635_3090_3441	80	AG	AG	58		80		23	11	58	0
224674_1462_1403	80	GT	AC	12		29		18	9	12	51
272158_1266_0087	80	CAACAG	AACAGC	45		67		23	3	45	13
276978_1103_2303	80	G	C	65		72		8	8	65	8
288052_0793_2947	80	AAC	AAC	1		12		12	4	1	68
288052_0793_2947	80	AAC	AAC	52		78		27	9	52	2
354797_0179_3038	80	TCT	AAG	1		15		15	5	1	65
354797_0179_3038	80	CTT	AAG	41		54		14	4	41	26
354797_0179_3038	80	CTT	AAG	56		76		21	7	56	4
356391_3101_3142	80	AG	AG	61		79		19	9	61	1
365964_2360_3090	80	GA	AG	1		8		8	4	1	72
405921_0756_1210	80	ATT	AAT	68		80		13	4	68	0
418683_2263_3912	80	CA	AC	59		69		11	5	59	11
436577_2129_0919	80	CA	AC	1		32		32	16	1	48
017508_3391_1401	81	AT	AT	10		17		8	4	10	64
019337_0913_0262	81	CCA	ACC	51		80		30	10	51	1
035322_2890_0294	81	GTT	AAC	1		13		13	4	1	68
047564_2948_2640	81	CT	AG	45		81		37	18	45	0
071440_3999_0439	81	CA	AC	62		80		19	9	62	1
071440_3999_0439	81	AT	AT	1		37		37	18	1	44
110714_2777_1994	81	TGT	AAC	6		19		14	4	6	62
110714_2777_1994	81	TTG	AAC	40		66		27	9	40	15
178777_2317_2707	81	GA	AG	13		21		9	4	13	60
271023_3482_2360	81	GTT	AAC	1		23		23	7	1	58
305734_1463_2033	81	TCA	ATC	8		30		23	7	8	51
430234_0644_3159	81	CAA	AAC	12		28		17	5	12	53
017910_0671_2659	82	CT	AG	11		30		20	10	11	52
017910_0671_2659	82	TC	AG	50		60		11	5	50	22
017910_0671_2659	82	TC	AG	62		80		19	9	62	2
064997_3220_0828	82	AAC	AAC	52		71		20	6	52	11
067882_1753_0134	82	TTC	AAG	61		79		19	6	61	3
070393_3396_0346	82	CCA	ACC	52		81		30	10	52	1
085147_0686_1153	82	AC	AC	72		80		9	4	72	2
085147_0686_1153	82	CT	AG	19		35		17	8	19	47
095253_1766_1610	82	AG	AG	48		61		14	7	48	21
095253_1766_1610	82	AG	AG	74		82		9	4	74	0
095253_1766_1610	82	GAG	AGG	62		73		12	4	62	9
126730_1581_3040	82	AC	AC	48		82		35	17	48	0
138129_1625_1115	82	CAA	AAC	25		41		17	5	25	41
138129_1625_1115	82	CAA	AAC	43		82		40	13	43	0
170604_1014_0914	82	GTT	AAC	2		36		35	11	2	46
170604_1014_0914	82	GTT	AAC	56		67		12	4	56	15
170604_1014_0914	82	TTG	AAC	69		82		14	4	69	0
194265_2832_2115	82	TG	AC	17		32		16	8	17	50
194265_2832_2115	82	TG	AC	45		58		14	7	45	24
194265_2832_2115	82	GA	AG	70		82		13	6	70	0
229467_3051_2288	82	AG	AG	1		24		24	12	1	58
229467_3051_2288	82	GA	AG	28		35		8	4	28	47
264759_1055_2551	82	ACA	AAC	1		19		19	6	1	63
264759_1055_2551	82	CAA	AAC	23		38		16	5	23	44
264759_1055_2551	82	CAA	AAC	68		81		14	4	68	1
322644_3574_1189	82	GA	AG	50		82		33	16	50	0
416435_0218_0480	82	ACA	AAC	68		79		12	4	68	3
143571_2275_3461	83	GT	AC	10		18		9	4	10	65
415442_0860_1696	83	GT	AC	8		20		13	6	8	63
415442_0860_1696	83	GT	AC	22		34		13	6	22	49
415442_0860_1696	83	GT	AC	68		83		16	8	68	0
479613_0153_3663	83	GAA	AAG	1		13		13	4	1	70
479613_0153_3663	83	TTC	AAG	17		33		17	5	17	50
479613_0153_3663	83	TTC	AAG	40		54		15	5	40	29
000910_3026_0403	84	AAG	AAG	5		16		12	4	5	68
000910_3026_0403	84	TTC	AAG	17		36		20	6	17	48
000910_3026_0403	84	TTC	AAG	42		59		18	6	42	25
000910_3026_0403	84	CTT	AAG	60		83		24	8	60	1
011005_3939_0359	84	AC	AC	16		24		9	4	16	60
030916_2524_0738	84	AGGG	AGGG	1		18		18	4	1	66
045966_0961_0678	84	CTT	AAG	1		17		17	5	1	67
045966_0961_0678	84	TCT	AAG	51		84		34	11	51	0
061605_1472_3926	84	GCAACA	AACAGC	54		82		29	4	54	2
074292_2659_2393	84	CTT	AAG	60		82		23	7	60	2
141250_1613_0808	84	GT	AC	1		15		15	7	1	69
145375_0424_2314	84	AAC	AAC	1		19		19	6	1	65
196408_3530_2396	84	GT	AC	48		58		11	5	48	26
196408_3530_2396	84	GT	AC	60		68		9	4	60	16
196408_3530_2396	84	TG	AC	1		12		12	6	1	72
196408_3530_2396	84	CG	CG	13		25		13	6	13	59
205035_1607_3729	84	AGT	ACT	71		84		14	4	71	0
205035_1607_3729	84	CAGTAG	ACTGCT	1		30		30	5	1	54
220474_2642_3325	84	AC	AC	28		37		10	5	28	47
220474_2642_3325	84	AC	AC	46		55		10	5	46	29
220474_2642_3325	84	AC	AC	66		79		14	7	66	5
220474_2642_3325	84	CT	AG	7		23		17	8	7	61
221079_2253_2834	84	GAC	ACG	2		31		30	10	2	53
374172_1022_3731	84	CAA	AAC	7		20		14	4	7	64
385509_2595_2940	84	GC	CG	6		16		11	5	6	68
385689_1060_1161	84	TAGT	AACT	70		81		12	3	70	3
032934_1347_3953	85	TGTA	ATAC	1		22		22	5	1	63
073423_0249_1442	85	GAG	AGG	73		85		13	4	73	0
119578_3673_0269	85	CAA	AAC	1		26		26	8	1	59
305759_0259_2509	85	AC	AC	43		85		43	21	43	0
472912_0821_2097	85	TA	AT	15		31		17	8	15	54
124655_0752_0614	86	TG	AC	45		58		14	7	45	28
124655_0752_0614	86	TG	AC	17		32		16	8	17	54
124655_0752_0614	86	GA	AG	70		82		13	6	70	4
144093_3894_3731	86	TG	AC	56		78		23	11	56	8
150460_3960_2704	86	TG	AC	1		14		14	7	1	72
150460_3960_2704	86	GT	AC	24		45		22	11	24	41
150460_3960_2704	86	TG	AC	66		79		14	7	66	7
151783_2746_0111	86	GT	AC	9		17		9	4	9	69
151783_2746_0111	86	GA	AG	62		86		25	12	62	0
229387_3364_2941	86	TTC	AAG	12		25		14	4	12	61
229387_3364_2941	86	TCT	AAG	62		74		13	4	62	12
251193_2942_2153	86	TG	AC	53		79		27	13	53	7
251193_2942_2153	86	GGTG	ACCC	1		12		12	3	1	74
255391_3280_2384	86	AT	AT	11		18		8	4	11	68
279837_0847_1485	86	GA	AG	17		25		9	4	17	61
279837_0847_1485	86	GAG	AGG	48		60		13	4	48	26
279837_0847_1485	86	GAG	AGG	68		83		16	5	68	3
279837_0847_1485	86	GGGGA	AGGGG	1		17		17	3	1	69
294591_2792_4015	86	ACA	AAC	1		42		42	14	1	44
294591_2792_4015	86	CAA	AAC	44		84		41	13	44	2
409913_2794_3359	86	ACA	AAC	1		34		34	11	1	52
000897_1720_1162	87	TCT	AAG	74		87		14	4	74	0
000897_1720_1162	87	CT	AG	69		76		8	4	69	11
024086_3543_3989	87	GT	AC	11		25		15	7	11	62
024086_3543_3989	87	GT	AC	27		35		9	4	27	52
024086_3543_3989	87	AG	AG	57		69		13	6	57	18
038354_2327_2664	87	ACA	AAC	20		44		25	8	20	43
038354_2327_2664	87	AAC	AAC	46		87		42	14	46	0
038354_2327_2664	87	CAG	AGC	3		19		17	5	3	68
053448_3779_1794	87	CTT	AAG	1		32		32	10	1	55
099392_2475_1940	87	ATT	AAT	66		80		15	5	66	7
117210_2651_1718	87	GA	AG	56		87		32	16	56	0
176153_1216_3496	87	CGT	ACG	76		87		12	4	76	0
191533_1497_1819	87	GAG	AGG	1		16		16	5	1	71
191533_1497_1819	87	GGA	AGG	18		37		20	6	18	50
191533_1497_1819	87	GAG	AGG	55		76		22	7	55	11
234572_1054_0396	87	TGT	AAC	44		87		44	14	44	0
283971_1845_1667	87	GT	AC	52		70		19	9	52	17
283971_1845_1667	87	AG	AG	71		87		17	8	71	0
416791_3154_0400	87	AC	AC	63		87		25	12	63	0
434219_3152_2748	87	AG	AG	17		30		14	7	17	57
037439_2425_2234	88	CGTT	AACG	72		88		17	4	72	0
069346_2870_0381	88	GTT	AAC	2		24		23	7	2	64
069346_2870_0381	88	GT	AC	63		88		26	13	63	0
069346_2870_0381	88	GTC	ACG	26		42		17	5	26	46
069346_2870_0381	88	GTC	ACG	43		62		20	6	43	26
094592_1484_1397	88	GA	AG	7		14		8	4	7	74
105048_3193_2090	88	AAC	AAC	1		40		40	13	1	48
105048_3193_2090	88	ACA	AAC	55		67		13	4	55	21
225019_0998_0631	88	ACA	AAC	3		20		18	6	3	68
225019_0998_0631	88	CAA	AAC	40		88		49	16	40	0
304593_3762_3099	88	AC	AC	5		22		18	9	5	66
304593_3762_3099	88	CA	AC	64		78		15	7	64	10
371875_3866_3226	88	AG	AG	63		88		26	13	63	0
398827_2361_2968	88	GT	AC	4		27		24	12	4	61
398827_2361_2968	88	GT	AC	80		88		9	4	80	0
408118_0615_2845	88	TCT	AAG	10		28		19	6	10	60
408118_0615_2845	88	CTC	AGG	50		61		12	4	50	27
456541_2481_3279	88	TG	AC	1		15		15	7	1	73
456541_2481_3279	88	GT	AC	58		88		31	15	58	0
474377_0060_0792	88	TTC	AAG	1		13		13	4	1	75
474377_0060_0792	88	CTT	AAG	50		63		14	4	50	25
474377_0060_0792	88	CTT	AAG	65		78		14	4	65	10
474377_0060_0792	88	CT	AG	79		86		8	4	79	2
475060_1614_3591	88	AG	AG	76		88		13	6	76	0
044028_0818_1003	89	TGT	AAC	1		17		17	5	1	72
044028_0818_1003	89	CTGTTG	AACAGC	18		35		18	3	18	54
059192_3044_1619	89	AAC	AAC	1		43		43	14	1	46
059192_3044_1619	89	CAA	AAC	45		64		20	6	45	25
124201_3877_1813	89	AC	AC	18		39		22	11	18	50
124201_3877_1813	89	CA	AC	41		87		47	23	41	2
189554_3554_3421	89	TAG	ACT	73		89		17	5	73	0
294222_3083_0178	89	TTC	AAG	23		43		21	7	23	46
294222_3083_0178	89	TCT	AAG	47		89		43	14	47	0
294222_3083_0178	89	CTTCCT	AAGAGG	1		22		22	3	1	67
301458_2689_2173	89	TGT	AAC	10		28		19	6	10	61
301458_2689_2173	89	GTG	ACC	66		77		12	4	66	12
434445_0902_0325	89	TG	AC	77		89		13	6	77	0
008226_1127_2113	90	CAG	AGC	13		29		17	5	13	61
019741_3801_1918	90	TGT	AAC	73		89		17	5	73	1
138067_0401_0959	90	AAC	AAC	1		32		32	10	1	58
237770_3214_3887	90	AAC	AAC	1		14		14	4	1	76
237770_3214_3887	90	ACA	AAC	65		80		16	5	65	10
246541_3115_0750	90	TTG	AAC	19		30		12	4	19	60
246541_3115_0750	90	CTG	AGC	1		18		18	6	1	72
313635_2291_0822	90	GT	AC	1		16		16	8	1	74
316242_1996_2932	90	TC	AG	74		90		17	8	74	0
343315_2566_2373	90	AG	AG	1		12		12	6	1	78
343315_2566_2373	90	GAGG	AGGG	13		36		24	6	13	54
009694_1075_3389	91	ACA	AAC	63		91		29	9	63	0
009694_1075_3389	91	CAC	ACC	17		30		14	4	17	61
030336_0601_2539	91	TG	AC	22		31		10	5	22	60
031983_0939_0727	91	TTG	AAC	42		90		49	16	42	1
031983_0939_0727	91	TGG	ACC	4		41		38	12	4	50
033152_0570_0921	91	CTT	AAG	5		18		14	4	5	73
033152_0570_0921	91	CTT	AAG	26		39		14	4	26	52
033152_0570_0921	91	CTTCTC	AAGGAG	59		87		29	4	59	4
053229_3576_1251	91	TGT	AAC	21		43		23	7	21	48
053229_3576_1251	91	TGT	AAC	60		91		32	10	60	0
061370_0222_3290	91	ACA	AAC	44		91		48	16	44	0
116209_1928_1532	91	CTCCTT	AAGGAG	1		20		20	3	1	71
170830_0442_2549	91	ACA	AAC	1		13		13	4	1	78
178879_1976_2547	91	AAC	AAC	80		91		12	4	80	0
206535_3089_3187	91	ACA	AAC	5		22		18	6	5	69
206535_3089_3187	91	AAC	AAC	25		41		17	5	25	50
206535_3089_3187	91	ACA	AAC	48		91		44	14	48	0
234846_1208_1700	91	TTG	AAC	1		21		21	7	1	70
234846_1208_1700	91	CTG	AGC	22		36		15	5	22	55
243785_1855_2465	91	CAA	AAC	1		17		17	5	1	74
243785_1855_2465	91	CCA	ACC	18		35		18	6	18	56
314843_2261_1017	91	TTG	AAC	20		37		18	6	20	54
314843_2261_1017	91	TGT	AAC	57		69		13	4	57	22
314843_2261_1017	91	TTG	AAC	71		91		21	7	71	0
334632_3652_3798	91	TG	AC	71		91		21	10	71	0
385479_3488_0790	91	GA	AG	61		91		31	15	61	0
405565_2475_1460	91	AT	AT	11		18		8	4	11	73
462212_1921_1402	91	GT	AC	68		91		24	12	68	0
046112_1767_1442	92	TC	AG	59		92		34	17	59	0
091619_1360_2805	92	TAG	ACT	73		92		20	6	73	0
202865_1894_2356	92	TG	AC	3		36		34	17	3	56
202865_1894_2356	92	GA	AG	72		80		9	4	72	12
213884_2302_1534	92	AGA	AAG	1		13		13	4	1	79
213884_2302_1534	92	GAA	AAG	80		92		13	4	80	0
219236_0708_1286	92	CAA	AAC	10		52		43	14	10	40
219236_0708_1286	92	AAC	AAC	54		71		18	6	54	21
224110_0924_2094	92	TTC	AAG	22		34		13	4	22	58
224110_0924_2094	92	TTC	AAG	52		92		41	13	52	0
244979_1640_3068	92	ACA	AAC	2		26		25	8	2	66
282618_3645_0374	92	AAG	AAG	81		92		12	4	81	0
282618_3645_0374	92	AGA	AAG	1		13		13	4	1	79
338684_3021_2152	92	TA	AT	46		92		47	23	46	0
370141_3553_2864	92	TGT	AAC	7		20		14	4	7	72
370141_3553_2864	92	TTG	AAC	69		80		12	4	69	12
370594_1715_3312	92	CAA	AAC	59		92		34	11	59	0
370594_1715_3312	92	CACCAA	AACACC	14		39		26	4	14	53
376755_0454_0386	92	ACA	AAC	40		64		25	8	40	28
376755_0454_0386	92	AAC	AAC	69		92		24	8	69	0
376755_0454_0386	92	CCA	ACC	1		39		39	13	1	53
477102_0340_3996	92	TACG	ACGT	70		81		12	3	70	11
065261_3996_1605	93	GT	AC	24		32		9	4	24	61
065261_3996_1605	93	GT	AC	53		75		23	11	53	18
065261_3996_1605	93	GT	AC	76		93		18	9	76	0
075144_1494_2911	93	AC	AC	61		84		24	12	61	9
075144_1494_2911	93	CA	AC	86		93		8	4	86	0
096579_2417_3263	93	TCT	AAG	14		33		20	6	14	60
096579_2417_3263	93	TCT	AAG	47		93		47	15	47	0
109712_2279_0434	93	AAC	AAC	70		84		15	5	70	9
109712_2279_0434	93	AAC	AAC	1		22		22	7	1	71
109712_2279_0434	93	AGC	AGC	54		69		16	5	54	24
111920_2567_1406	93	TGT	AAC	1		35		35	11	1	58
111920_2567_1406	93	GTT	AAC	65		78		14	4	65	15
118744_3474_0803	93	GT	AC	24		32		9	4	24	61
118744_3474_0803	93	GT	AC	53		93		41	20	53	0
135945_2596_1455	93	AC	AC	1		43		43	21	1	50
135945_2596_1455	93	AT	AT	45		93		49	24	45	0
204712_0315_2580	93	GTGC	ACGC	23		37		15	3	23	56
244746_1618_2286	93	CT	AG	71		93		23	11	71	0
347821_3795_3382	93	ACA	AAC	74		93		20	6	74	0
428407_2873_3164	93	TC	AG	25		47		23	11	25	46
428407_2873_3164	93	TC	AG	56		67		12	6	56	26
428407_2873_3164	93	TC	AG	69		93		25	12	69	0
447096_1916_0229	93	AGA	AAG	12		25		14	4	12	68
023719_1816_2883	94	AG	AG	14		24		11	5	14	70
023719_1816_2883	94	GA	AG	52		66		15	7	52	28
023719_1816_2883	94	GA	AG	70		77		8	4	70	17
023719_1816_2883	94	AGAT	ATAG	22		36		15	3	22	58
065310_2462_2641	94	ACA	AAC	57		73		17	5	57	21
065310_2462_2641	94	AAC	AAC	77		94		18	6	77	0
118169_3684_4050	94	AG	AG	64		94		31	15	64	0
216657_1887_0861	94	ACA	AAC	1		15		15	5	1	79
216657_1887_0861	94	AAC	AAC	45		94		50	16	45	0
422551_2681_3337	94	AC	AC	22		52		31	15	22	42
422551_2681_3337	94	TA	AT	53		92		40	20	53	2
455276_3486_1866	94	TG	AC	64		94		31	15	64	0
008978_2183_0233	95	TC	AG	1		13		13	6	1	82
008978_2183_0233	95	GC	CG	15		26		12	6	15	69
065779_1739_2560	95	CAG	AGC	16		38		23	7	16	57
162742_0892_1907	95	AC	AC	61		93		33	16	61	2
162742_0892_1907	95	GA	AG	13		20		8	4	13	75
172760_3682_1781	95	GGA	AGG	1		15		15	5	1	80
172760_3682_1781	95	GGA	AGG	28		47		20	6	28	48
172760_3682_1781	95	GAG	AGG	65		77		13	4	65	18
240873_0921_0686	95	GTA	ACT	74		87		14	4	74	8
252131_1396_0254	95	AC	AC	18		32		15	7	18	63
252131_1396_0254	95	AC	AC	84		95		12	6	84	0
252131_1396_0254	95	TC	AG	70		83		14	7	70	12
252131_1396_0254	95	CT	AG	1		17		17	8	1	78
258991_2613_0511	95	TG	AC	52		89		38	19	52	6
258991_2613_0511	95	AT	AT	1		40		40	20	1	55
269915_1970_2776	95	CA	AC	1		8		8	4	1	87
269915_1970_2776	95	AC	AC	16		25		10	5	16	70
269915_1970_2776	95	CA	AC	59		71		13	6	59	24
269915_1970_2776	95	CA	AC	83		95		13	6	83	0
278876_0633_1924	95	AC	AC	52		95		44	22	52	0
435880_0406_2104	95	AC	AC	63		95		33	16	63	0
488717_1945_2796	95	CTAA	AACT	71		87		17	4	71	8
488717_1945_2796	95	CTA	ACT	57		68		12	4	57	27
011925_1439_3642	96	TTA	AAT	1		26		26	8	1	70
050471_1677_2854	96	AAC	AAC	1		32		32	10	1	64
081316_0182_2310	96	TTC	AAG	5		16		12	4	5	80
081316_0182_2310	96	TCT	AAG	21		43		23	7	21	53
081316_0182_2310	96	TCT	AAG	51		92		42	14	51	4
108314_0624_0619	96	AAC	AAC	1		46		46	15	1	50
108314_0624_0619	96	GCAACA	AACAGC	47		96		50	8	47	0
110875_2872_1382	96	CAG	AGC	61		78		18	6	61	18
184866_1526_2244	96	GTAC	ACGT	83		96		14	3	83	0
009244_1463_2711	97	GA	AG	40		81		42	21	40	16
009244_1463_2711	97	AG	AG	85		97		13	6	85	0
052611_1782_0884	97	ACA	AAC	1		33		33	11	1	64
052611_1782_0884	97	CAA	AAC	56		97		42	14	56	0
059301_2504_2887	97	GTT	AAC	1		21		21	7	1	76
059301_2504_2887	97	TTG	AAC	23		36		14	4	23	61
059301_2504_2887	97	TGT	AAC	51		70		20	6	51	27
059301_2504_2887	97	TGT	AAC	75		91		17	5	75	6
059462_2837_4023	97	CAA	AAC	1		24		24	8	1	73
059462_2837_4023	97	AAC	AAC	41		97		57	19	41	0
076929_2337_2101	97	AAC	AAC	19		35		17	5	19	62
076929_2337_2101	97	ACA	AAC	78		97		20	6	78	0
148444_2017_1674	97	GA	AG	55		97		43	21	55	0
179421_0387_2136	97	GA	AG	1		27		27	13	1	70
185794_2389_0720	97	ACA	AAC	69		97		29	9	69	0
227644_3727_3255	97	AC	AC	52		95		44	22	52	2
258619_0512_3080	97	CAA	AAC	1		24		24	8	1	73
329124_3864_2132	97	TTC	AAG	14		25		12	4	14	72
329124_3864_2132	97	CTT	AAG	52		92		41	13	52	5
342727_3443_3459	97	TTG	AAC	47		97		51	17	47	0
342727_3443_3459	97	TGG	ACC	6		19		14	4	6	78
346443_0525_3314	97	TA	AT	61		97		37	18	61	0
016919_0879_1399	98	TA	AT	52		98		47	23	52	0
019325_1133_1298	98	TGT	AAC	1		32		32	10	1	66
045120_3210_1835	98	TG	AC	83		91		9	4	83	7
090627_3274_2896	98	TGT	AAC	5		51		47	15	5	47
090627_3274_2896	98	CTG	AGC	52		75		24	8	52	23
194269_2465_2299	98	GA	AG	49		77		29	14	49	21
194269_2465_2299	98	GA	AG	79		98		20	10	79	0
338919_3028_2767	98	CA	AC	3		42		40	20	3	56
338919_3028_2767	98	AT	AT	44		98		55	27	44	0
347303_2498_3484	98	CTT	AAG	25		38		14	4	25	60
347303_2498_3484	98	CTT	AAG	40		98		59	19	40	0
356487_3270_3224	98	GTA	ACT	81		98		18	6	81	0
389052_2424_1771	98	TGT	AAC	1		14		14	4	1	84
389052_2424_1771	98	GTT	AAC	48		98		51	17	48	0
417293_2881_0133	98	AT	AT	76		98		23	11	76	0
019336_0963_0977	99	AC	AC	75		84		10	5	75	15
019336_0963_0977	99	CG	CG	87		94		8	4	87	5
036348_2558_0987	99	AAG	AAG	8		23		16	5	8	76
036348_2558_0987	99	TCT	AAG	61		99		39	13	61	0
048982_1863_2959	99	TCTT	AAAG	83		99		17	4	83	0
130951_2184_2001	99	AT	AT	85		99		15	7	85	0
186625_2501_1034	99	TGT	AAC	66		80		15	5	66	19
186625_2501_1034	99	GT	AC	81		99		19	9	81	0
196730_1761_3608	99	TG	AC	24		43		20	10	24	56
196730_1761_3608	99	GA	AG	45		94		50	25	45	5
224763_1504_1685	99	TA	AT	44		94		51	25	44	5
236683_0597_2683	99	ACT	ACT	88		99		12	4	88	0
236683_0597_2683	99	TC	AG	55		87		33	16	55	12
294517_0983_2108	99	TA	AT	40		97		58	29	40	2
037985_1011_0835	100	TGT	AAC	8		29		22	7	8	71
037985_1011_0835	100	GTT	AAC	48		82		35	11	48	18
037985_1011_0835	100	TGT	AAC	84		100		17	5	84	0
103601_3127_0561	100	AGT	ACT	80		100		21	7	80	0
118887_3182_3548	100	TGT	AAC	60		73		14	4	60	27
118887_3182_3548	100	GTT	AAC	7		25		19	6	7	75
140645_0696_1343	100	CAA	AAC	22		60		39	13	22	40
140645_0696_1343	100	ACA	AAC	78		92		15	5	78	8
140645_0696_1343	100	AAT	AAT	2		14		13	4	2	86
152460_0934_3358	100	TGT	AAC	15		28		14	4	15	72
152460_0934_3358	100	TTG	AAC	44		100		57	19	44	0
152460_0934_3358	100	GTG	ACC	29		43		15	5	29	57
190606_0491_3881	100	AC	AC	49		100		52	26	49	0
190606_0491_3881	100	TC	AG	1		8		8	4	1	92
190606_0491_3881	100	CT	AG	10		48		39	19	10	52
223069_2400_3562	100	A	A	58		72		15	15	58	28
223069_2400_3562	100	A	A	81		95		15	15	81	5
237066_2524_0128	100	AG	AG	29		45		17	8	29	55
237066_2524_0128	100	AG	AG	47		99		53	26	47	1
240994_2563_3958	100	AGA	AAG	1		17		17	5	1	83
240994_2563_3958	100	AGA	AAG	64		83		20	6	64	17
240994_2563_3958	100	GAG	AGG	18		40		23	7	18	60
250001_2776_0197	100	CA	AC	25		55		31	15	25	45
250001_2776_0197	100	CA	AC	57		90		34	17	57	10
263948_3632_2225	100	TTG	AAC	16		43		28	9	16	57
263948_3632_2225	100	TTG	AAC	45		100		56	18	45	0
371449_1209_1044	100	GA	AG	45		100		56	28	45	0
386861_0737_3437	100	GT	AC	64		98		35	17	64	2
082796_2199_3186	101	CAA	AAC	4		26		23	7	4	75
082796_2199_3186	101	CAA	AAC	58		95		38	12	58	6
088401_1222_2755	101	AG	AG	8		16		9	4	8	85
088401_1222_2755	101	GA	AG	19		27		9	4	19	74
253880_1289_1994	101	CAA	AAC	3		28		26	8	3	73
253880_1289_1994	101	CAA	AAC	45		100		56	18	45	1
320498_0351_0891	101	CT	AG	52		101		50	25	52	0
407518_1629_3492	101	GT	AC	1		15		15	7	1	86
407518_1629_3492	101	GT	AC	73		81		9	4	73	20
407518_1629_3492	101	TG	AC	83		101		19	9	83	0
407518_1629_3492	101	GTGCGT	ACACGC	57		77		21	3	57	24
407518_1629_3492	101	CG	CG	16		27		12	6	16	74
131819_1526_0762	102	AG	AG	74		84		11	5	74	18
131819_1526_0762	102	AG	AG	95		102		8	4	95	0
194078_2674_0240	102	TGT	AAC	1		41		41	13	1	61
194078_2674_0240	102	TGT	AAC	43		102		60	20	43	0
230439_1465_2572	102	CAA	AAC	3		22		20	6	3	80
230439_1465_2572	102	CAA	AAC	24		54		31	10	24	48
324349_0852_0732	102	ACA	AAC	82		93		12	4	82	9
324349_0852_0732	102	CAACAG	AACAGC	9		31		23	3	9	71
352746_3202_2583	102	CTT	AAG	61		92		32	10	61	10
355976_2537_0369	102	AT	AT	43		101		59	29	43	1
066504_0069_2146	103	AG	AG	50		102		53	26	50	1
073396_0866_2738	103	CG	CG	56		97		42	21	56	6
113136_2233_0443	103	AC	AC	67		76		10	5	67	27
113136_2233_0443	103	CACACG	ACACGC	72		100		29	4	72	3
151515_0496_0447	103	AAC	AAC	92		103		12	4	92	0
235191_2009_1004	103	AC	AC	14		32		19	9	14	71
235191_2009_1004	103	CT	AG	1		13		13	6	1	90
344547_0561_0242	103	GT	AC	47		96		50	25	47	7
344547_0561_0242	103	TA	AT	18		46		29	14	18	57
386734_3251_0087	103	TG	AC	71		93		23	11	71	10
400220_1577_1167	103	TG	AC	48		103		56	28	48	0
400220_1577_1167	103	AT	AT	1		44		44	22	1	59
432723_0158_2913	103	AC	AC	88		103		16	8	88	0
007471_1551_2923	104	TTG	AAC	52		103		52	17	52	1
007471_1551_2923	104	TGTTGC	AACAGC	23		45		23	3	23	59
032636_2342_2498	104	TTC	AAG	92		104		13	4	92	0
032636_2342_2498	104	CTT	AAG	1		39		39	13	1	65
032636_2342_2498	104	TTA	AAT	68		88		21	7	68	16
035320_0782_1946	104	TGT	AAC	93		104		12	4	93	0
118596_0912_2102	104	TGT	AAC	65		84		20	6	65	20
118596_0912_2102	104	TGT	AAC	86		104		19	6	86	0
118596_0912_2102	104	TGC	AGC	5		30		26	8	5	74
127990_0257_3919	104	GTT	AAC	26		41		16	5	26	63
127990_0257_3919	104	TTG	AAC	45		86		42	14	45	18
127990_0257_3919	104	TGT	AAC	88		101		14	4	88	3
146182_0588_1769	104	AAC	AAC	22		46		25	8	22	58
146182_0588_1769	104	AAC	AAC	70		104		35	11	70	0
179563_3176_3948	104	GA	AG	42		104		63	31	42	0
241009_3371_0173	104	AAC	AAC	78		92		15	5	78	12
241009_3371_0173	104	ACA	AAC	21		40		20	6	21	64
241009_3371_0173	104	GCA	AGC	3		20		18	6	3	84
270014_0247_3573	104	CTT	AAG	1		62		62	20	1	42
270014_0247_3573	104	TCT	AAG	71		95		25	8	71	9
285267_1076_0161	104	AT	AT	51		104		54	27	51	0
343120_3028_3603	104	CAA	AAC	8		23		16	5	8	81
343120_3028_3603	104	CAA	AAC	29		42		14	4	29	62
343120_3028_3603	104	CAA	AAC	86		99		14	4	86	5
359189_1223_2395	104	AG	AG	74		102		29	14	74	2
040944_3771_1163	105	CAA	AAC	68		102		35	11	68	3
040944_3771_1163	105	AAC	AAC	6		27		22	7	6	78
040944_3771_1163	105	CCA	ACC	28		48		21	7	28	57
047997_2431_2187	105	GTT	AAC	1		21		21	7	1	84
054806_1583_0046	105	TTG	AAC	26		40		15	5	26	65
054806_1583_0046	105	TGT	AAC	66		82		17	5	66	23
054806_1583_0046	105	TGT	AAC	84		101		18	6	84	4
136414_3812_2928	105	TTG	AAC	60		76		17	5	60	29
136414_3812_2928	105	TGT	AAC	82		105		24	8	82	0
172937_2758_3957	105	CAA	AAC	61		92		32	10	61	13
172937_2758_3957	105	CAACAG	AACAGC	1		23		23	3	1	82
395293_2001_0660	105	TC	AG	75		96		22	11	75	9
395293_2001_0660	105	CT	AG	98		105		8	4	98	0
397695_0058_3048	105	CA	AC	69		105		37	18	69	0
435252_0744_2998	105	AT	AT	75		100		26	13	75	5
005946_1392_2854	106	CAA	AAC	1		20		20	6	1	86
005946_1392_2854	106	CAA	AAC	25		39		15	5	25	67
005946_1392_2854	106	AAC	AAC	41		95		55	18	41	11
006495_1098_1129	106	TTG	AAC	47		106		60	20	47	0
006495_1098_1129	106	GTTGCT	AACAGC	1		46		46	7	1	60
012484_1336_1442	106	CTG	AGC	62		94		33	11	62	12
012484_1336_1442	106	TGC	AGC	12		43		32	10	12	63
023151_2803_3397	106	TTG	AAC	48		77		30	10	48	29
023151_2803_3397	106	TGT	AAC	94		106		13	4	94	0
026141_1464_1767	106	TA	AT	49		106		58	29	49	0
048662_2300_1125	106	TTG	AAC	86		97		12	4	86	9
048662_2300_1125	106	GTT	AAC	1		36		36	12	1	70
048662_2300_1125	106	TGTTGC	AACAGC	63		85		23	3	63	21
049306_3664_1372	106	ACACA	AACAC	84		98		15	3	84	8
049306_3664_1372	106	CA	AC	79		88		10	5	79	18
049306_3664_1372	106	AC	AC	94		105		12	6	94	1
049306_3664_1372	106	GA	AG	61		78		18	9	61	28
121669_1257_3798	106	TTC	AAG	78		106		29	9	78	0
121669_1257_3798	106	TAT	AAT	1		37		37	12	1	69
130328_0375_2965	106	AG	AG	50		102		53	26	50	4
160668_1064_2179	106	GT	AC	17		32		16	8	17	74
160668_1064_2179	106	AT	AT	1		16		16	8	1	90
318314_3946_2816	106	AT	AT	60		103		44	22	60	3
318314_3946_2816	106	GC	CG	3		11		9	4	3	95
320677_1032_0976	106	CAA	AAC	78		103		26	8	78	3
320677_1032_0976	106	CAG	AGC	24		37		14	4	24	69
037993_1416_3852	107	TG	AC	61		105		45	22	61	2
038469_1511_0795	107	AAC	AAC	1		14		14	4	1	93
038469_1511_0795	107	AAC	AAC	16		67		52	17	16	40
038469_1511_0795	107	CAA	AAC	69		85		17	5	69	22
104014_2645_0742	107	ACA	AAC	24		42		19	6	24	65
104014_2645_0742	107	ACA	AAC	43		107		65	21	43	0
104014_2645_0742	107	CAG	AGC	1		17		17	5	1	90
258609_3473_0265	107	TA	AT	1		25		25	12	1	82
052481_1634_0483	108	TGT	AAC	13		66		54	18	13	42
052481_1634_0483	108	GT	AC	67		108		42	21	67	0
052499_3896_2790	108	CTGTTG	AACAGC	1		21		21	3	1	87
052499_3896_2790	108	TGCTGT	AACAGC	71		90		20	3	71	18
052499_3896_2790	108	TTGCTG	AACAGC	91		108		18	3	91	0
120797_0097_3401	108	GT	AC	28		38		11	5	28	70
120797_0097_3401	108	GT	AC	58		108		51	25	58	0
139652_0957_3654	108	AAG	AAG	89		108		20	6	89	0
139652_0957_3654	108	GAG	AGG	59		88		30	10	59	20
271686_2304_1331	108	AC	AC	2		54		53	26	2	54
271686_2304_1331	108	TA	AT	55		94		40	20	55	14
385652_0696_2922	108	AAG	AAG	20		36		17	5	20	72
385652_0696_2922	108	CTT	AAG	78		99		22	7	78	9
016001_1604_2396	109	AACAGC	AACAGC	1		58		58	9	1	51
040015_2631_0554	109	TTG	AAC	1		67		67	22	1	42
040015_2631_0554	109	GT	AC	68		109		42	21	68	0
073971_2408_2986	109	GA	AG	78		109		32	16	78	0
112207_1743_3481	109	GTT	AAC	63		109		47	15	63	0
112207_1743_3481	109	TTC	AAG	1		62		62	20	1	47
124873_0706_0794	109	AT	AT	55		109		55	27	55	0
129795_0720_2193	109	TGT	AAC	8		20		13	4	8	89
129795_0720_2193	109	TGT	AAC	23		41		19	6	23	68
129795_0720_2193	109	TTG	AAC	43		84		42	14	43	25
129795_0720_2193	109	TGT	AAC	86		109		24	8	86	0
297348_3271_3451	109	GA	AG	51		97		47	23	51	12
297348_3271_3451	109	GA	AG	101		109		9	4	101	0
317447_2449_1958	109	TTG	AAC	53		81		29	9	53	28
317447_2449_1958	109	TTG	AAC	83		109		27	9	83	0
329986_2791_2948	109	AG	AG	87		109		23	11	87	0
329986_2791_2948	109	AGAT	ATAG	75		89		15	3	75	20
399843_3318_3041	109	CAA	AAC	77		102		26	8	77	7
399843_3318_3041	109	CAG	AGC	23		36		14	4	23	73
441453_1020_3326	109	AAC	AAC	46		96		51	17	46	13
441453_1020_3326	109	AAC	AAC	98		109		12	4	98	0
021567_1262_2996	110	CAA	AAC	41		110		70	23	41	0
025868_1682_1959	110	ACGT	ACGT	94		110		17	4	94	0
025868_1682_1959	110	AG	AG	1		25		25	12	1	85
038795_1678_1624	110	ACA	AAC	79		93		15	5	79	17
069010_0954_0688	110	CAA	AAC	27		40		14	4	27	70
069010_0954_0688	110	CAA	AAC	54		110		57	19	54	0
125694_3380_2534	110	TTG	AAC	1		15		15	5	1	95
125694_3380_2534	110	GTG	ACC	73		101		29	9	73	9
125694_3380_2534	110	CTG	AGC	16		30		15	5	16	80
175366_3719_1857	110	AG	AG	56		110		55	27	56	0
179121_0091_1392	110	CAA	AAC	80		102		23	7	80	8
179121_0091_1392	110	AGC	AGC	1		62		62	20	1	48
265764_1331_0373	110	TGT	AAC	9		22		14	4	9	88
265764_1331_0373	110	TGT	AAC	24		37		14	4	24	73
265764_1331_0373	110	TG	AC	66		110		45	22	66	0
292133_2592_4003	110	AC	AC	49		105		57	28	49	5
304132_2712_3183	110	CAA	AAC	17		41		25	8	17	69
304132_2712_3183	110	ACA	AAC	43		86		44	14	43	24
304132_2712_3183	110	AAC	AAC	88		100		13	4	88	10
385606_2190_2527	110	TG	AC	1		8		8	4	1	102
000435_1642_1999	111	CTT	AAG	8		21		14	4	8	90
000435_1642_1999	111	CTT	AAG	68		108		41	13	68	3
008484_3803_0679	111	AAC	AAC	1		64		64	21	1	47
079328_1870_3349	111	GTT	AAC	1		29		29	9	1	82
079328_1870_3349	111	TGT	AAC	78		108		31	10	78	3
043836_3033_0286	112	GA	AG	96		104		9	4	96	8
043836_3033_0286	112	AT	AT	49		95		47	23	49	17
127414_3161_2050	112	CAA	AAC	46		84		39	13	46	28
127414_3161_2050	112	AAC	AAC	86		112		27	9	86	0
127414_3161_2050	112	CAGCAA	AACAGC	10		29		20	3	10	83
167150_1605_1033	112	TCT	AAG	55		105		51	17	55	7
167150_1605_1033	112	TCTTCG	AAGACG	4		26		23	3	4	86
182648_2441_1614	112	AC	AC	24		48		25	12	24	64
182648_2441_1614	112	AC	AC	49		112		64	32	49	0
308875_2676_2823	112	AG	AG	24		34		11	5	24	78
308875_2676_2823	112	AG	AG	59		102		44	22	59	10
330849_0995_0116	112	GA	AG	62		109		48	24	62	3
006844_2542_2274	113	AAC	AAC	1		28		28	9	1	85
006844_2542_2274	113	CAA	AAC	99		113		15	5	99	0
008794_1093_0983	113	CAA	AAC	51		109		59	19	51	4
008794_1093_0983	113	GCAACA	AACAGC	5		34		30	5	5	79
044956_2397_1504	113	AG	AG	55		113		59	29	55	0
056980_3099_1746	113	ACG	ACG	1		28		28	9	1	85
056980_3099_1746	113	ACG	ACG	84		97		14	4	84	16
133801_2173_0834	113	GA	AG	48		113		66	33	48	0
212089_0847_0139	113	GT	AC	42		113		72	36	42	0
232232_0309_1268	113	GCTGTT	AACAGC	1		58		58	9	1	55
232232_0309_1268	113	TGC	AGC	66		103		38	12	66	10
290805_2688_0049	113	TG	AC	64		113		50	25	64	0
373311_2961_2729	113	TA	AT	103		111		9	4	103	2
391023_3702_0784	113	AT	AT	53		113		61	30	53	0
393262_0060_3788	113	AG	AG	57		113		57	28	57	0
004911_1189_0972	114	TGT	AAC	89		114		26	8	89	0
091112_1873_0776	114	TTG	AAC	1		24		24	8	1	90
091112_1873_0776	114	TGTTGC	AACAGC	77		96		20	3	77	18
091112_1873_0776	114	GTG	ACC	25		39		15	5	25	75
091915_0827_2481	114	TAA	AAT	81		111		31	10	81	3
128406_2705_1554	114	AC	AC	55		114		60	30	55	0
140054_1123_1652	114	GTT	AAC	1		24		24	8	1	90
140054_1123_1652	114	TGT	AAC	26		66		41	13	26	48
140054_1123_1652	114	TGT	AAC	74		113		40	13	74	1
173495_0552_4011	114	CA	AC	59		85		27	13	59	29
173495_0552_4011	114	CACC	ACCC	21		35		15	3	21	79
173495_0552_4011	114	TC	AG	97		110		14	7	97	4
290757_1068_2071	114	GA	AG	64		113		50	25	64	1
306461_3940_3525	114	TTC	AAG	1		70		70	23	1	44
306461_3940_3525	114	CT	AG	71		108		38	19	71	6
504770_3018_1507	114	TGT	AAC	40		114		75	25	40	0
083098_2693_0157	115	TTG	AAC	1		12		12	4	1	103
083098_2693_0157	115	TGT	AAC	47		109		63	21	47	6
095490_3883_1111	115	GA	AG	48		111		64	32	48	4
118647_0923_3675	115	ACA	AAC	94		115		22	7	94	0
118647_0923_3675	115	ACA	AAC	1		51		51	17	1	64
118647_0923_3675	115	CAG	AGC	71		87		17	5	71	28
146468_1190_0854	115	GA	AG	48		113		66	33	48	2
164424_2916_2476	115	GA	AG	48		113		66	33	48	2
224280_3274_2494	115	GA	AG	91		108		18	9	91	7
224280_3274_2494	115	ATAG	ATAG	18		32		15	3	18	83
224280_3274_2494	115	TAGA	ATAG	71		90		20	5	71	25
228527_3872_2106	115	CA	AC	58		109		52	26	58	6
228527_3872_2106	115	GA	AG	25		34		10	5	25	81
240237_1221_0657	115	GT	AC	5		12		8	4	5	103
240237_1221_0657	115	AC	AC	47		115		69	34	47	0
311591_2227_2885	115	TTG	AAC	64		112		49	16	64	3
311591_2227_2885	115	TTGCTG	AACAGC	25		43		19	3	25	72
398690_2357_2647	115	CAA	AAC	1		38		38	12	1	77
398690_2357_2647	115	CAA	AAC	40		115		76	25	40	0
005905_3391_1087	116	GT	AC	29		37		9	4	29	79
005905_3391_1087	116	TG	AC	60		104		45	22	60	12
005905_3391_1087	116	GA	AG	108		115		8	4	108	1
024133_1135_1720	116	ACA	AAC	1		33		33	11	1	83
024133_1135_1720	116	AAC	AAC	97		109		13	4	97	7
054650_2920_2367	116	GTT	AAC	104		116		13	4	104	0
074711_1356_2268	116	CAA	AAC	53		116		64	21	53	0
074920_1505_2259	116	CAA	AAC	17		39		23	7	17	77
074920_1505_2259	116	CAA	AAC	53		116		64	21	53	0
079417_2316_1157	116	AAC	AAC	91		105		15	5	91	11
083150_1300_0146	116	TGT	AAC	10		23		14	4	10	93
083150_1300_0146	116	TTG	AAC	60		99		40	13	60	17
251373_3546_2857	116	AAC	AAC	1		49		49	16	1	67
252805_1613_2593	116	AG	AG	92		114		23	11	92	2
252805_1613_2593	116	AT	AT	54		90		37	18	54	26
322657_2998_0943	116	AG	AG	56		99		44	22	56	17
322657_2998_0943	116	AG	AG	108		116		9	4	108	0
322657_2998_0943	116	CGG	CCG	29		40		12	4	29	76
012804_1982_1413	117	TTG	AAC	102		116		15	5	102	1
012804_1982_1413	117	TTG	AAC	1		15		15	5	1	102
012804_1982_1413	117	TGG	ACC	88		101		14	4	88	16
014332_1911_0413	117	CA	AC	76		117		42	21	76	0
023463_1179_1956	117	AC	AC	5		13		9	4	5	104
023463_1179_1956	117	AC	AC	49		112		64	32	49	5
026391_1137_3024	117	TTG	AAC	1		15		15	5	1	102
026391_1137_3024	117	TGT	AAC	26		51		26	8	26	66
026391_1137_3024	117	TTG	AAC	61		110		50	16	61	7
028618_2664_3972	117	AT	AT	74		117		44	22	74	0
061528_1405_3253	117	TTC	AAG	10		21		12	4	10	96
113093_1861_1954	117	GA	AG	48		117		70	35	48	0
130338_1285_2361	117	AG	AG	46		117		72	36	46	0
214189_1560_0145	117	TTG	AAC	75		105		31	10	75	12
214189_1560_0145	117	TGTTGC	AACAGC	7		47		41	6	7	70
220394_0465_1702	117	GT	AC	5		12		8	4	5	105
220394_0465_1702	117	AC	AC	46		113		68	34	46	4
269236_2486_2779	117	AG	AG	73		115		43	21	73	2
337547_3711_2997	117	G	C	6		27		22	22	6	90
357500_3833_1385	117	TC	AG	70		117		48	24	70	0
005880_2532_0358	118	AT	AT	74		118		45	22	74	0
035740_2876_1067	118	TCT	AAG	1		13		13	4	1	105
035740_2876_1067	118	TTC	AAG	20		34		15	5	20	84
078231_2740_1229	118	TGT	AAC	9		78		70	23	9	40
078231_2740_1229	118	TGT	AAC	79		118		40	13	79	0
102140_1959_2101	118	GT	AC	5		19		15	7	5	99
102140_1959_2101	118	TG	AC	83		94		12	6	83	24
102140_1959_2101	118	GTGG	ACCC	95		110		16	4	95	8
102140_1959_2101	118	AG	AG	20		36		17	8	20	82
110560_0717_1548	118	CAA	AAC	6		25		20	6	6	93
110560_0717_1548	118	CAA	AAC	27		40		14	4	27	78
110560_0717_1548	118	AAC	AAC	80		118		39	13	80	0
296092_3352_3093	118	ACA	AAC	1		15		15	5	1	103
296092_3352_3093	118	CAA	AAC	56		101		46	15	56	17
296092_3352_3093	118	CAA	AAC	103		116		14	4	103	2
365685_0968_3576	118	CAA	AAC	8		23		16	5	8	95
365685_0968_3576	118	CAA	AAC	29		42		14	4	29	76
365685_0968_3576	118	CAA	AAC	86		118		33	11	86	0
002899_0839_3625	119	TGT	AAC	1		38		38	12	1	81
002899_0839_3625	119	TGT	AAC	55		119		65	21	55	0
010787_1311_0264	119	TTC	AAG	79		114		36	12	79	5
041084_1195_1973	119	TGT	AAC	1		41		41	13	1	78
041084_1195_1973	119	TTG	AAC	87		119		33	11	87	0
045870_0392_0690	119	TCT	AAG	8		31		24	8	8	88
045870_0392_0690	119	TTC	AAG	60		119		60	20	60	0
106262_3797_3118	119	TA	AT	56		119		64	32	56	0
126970_0974_0284	119	TTC	AAG	1		16		16	5	1	103
126970_0974_0284	119	CTT	AAG	17		36		20	6	17	83
126970_0974_0284	119	TCT	AAG	70		90		21	7	70	29
126970_0974_0284	119	TCT	AAG	93		119		27	9	93	0
221420_3151_3407	119	AAC	AAC	28		43		16	5	28	76
221420_3151_3407	119	ACA	AAC	79		109		31	10	79	10
320818_2567_2424	119	GA	AG	1		76		76	38	1	43
320818_2567_2424	119	AG	AG	77		119		43	21	77	0
060473_1845_2682	120	AAC	AAC	20		41		22	7	20	79
060473_1845_2682	120	ACA	AAC	68		120		53	17	68	0
159009_2174_2222	120	TCT	AAG	1		46		46	15	1	74
159009_2174_2222	120	TTC	AAG	64		104		41	13	64	16
159009_2174_2222	120	TTA	AAT	106		120		15	5	106	0
201065_3859_1688	120	CA	AC	1		8		8	4	1	112
201065_3859_1688	120	AC	AC	45		92		48	24	45	28
201065_3859_1688	120	ACG	ACG	96		120		25	8	96	0
250786_1481_2357	120	GTAG	ACCT	76		120		45	11	76	0
250786_1481_2357	120	AG	AG	1		70		70	35	1	50
322845_1107_3163	120	GTT	AAC	22		55		34	11	22	65
322845_1107_3163	120	TTG	AAC	74		113		40	13	74	7
359970_2000_1976	120	TGT	AAC	51		116		66	22	51	4
359970_2000_1976	120	GTTGCT	AACAGC	1		46		46	7	1	74
426777_0500_0730	120	AC	AC	59		96		38	19	59	24
426777_0500_0730	120	CA	AC	97		120		24	12	97	0
007792_1106_1843	121	TGT	AAC	21		32		12	4	21	89
007792_1106_1843	121	TGT	AAC	75		121		47	15	75	0
010457_0487_1795	121	TG	AC	61		105		45	22	61	16
010457_0487_1795	121	GA	AG	109		116		8	4	109	5
012168_0870_3116	121	CAA	AAC	51		111		61	20	51	10
012168_0870_3116	121	GCAACA	AACAGC	5		34		30	5	5	87
039951_0218_2478	121	TTG	AAC	3		64		62	20	3	57
039951_0218_2478	121	TTG	AAC	71		102		32	10	71	19
039951_0218_2478	121	CTT	AAG	103		121		19	6	103	0
044076_3879_0890	121	AT	AT	76		121		46	23	76	0
088235_2144_0696	121	GA	AG	48		117		70	35	48	4
120428_2123_0558	121	CTT	AAG	11		23		13	4	11	98
120428_2123_0558	121	TCT	AAG	88		102		15	5	88	19
120428_2123_0558	121	CTT	AAG	103		121		19	6	103	0
129019_2898_1696	121	TTC	AAG	1		29		29	9	1	92
129019_2898_1696	121	ATT	AAT	92		119		28	9	92	2
026078_1706_3127	122	GTT	AAC	29		46		18	6	29	76
026078_1706_3127	122	TGTTGC	AACAGC	64		98		35	5	64	24
026078_1706_3127	122	TGCTG	ACAGC	103		122		20	4	103	0
059915_0268_3404	122	AG	AG	59		120		62	31	59	2
216744_1694_0963	122	CA	AC	114		122		9	4	114	0
253942_3754_1186	122	GT	AC	1		8		8	4	1	114
253942_3754_1186	122	AC	AC	62		116		55	27	62	6
489922_3765_1461	122	CTT	AAG	1		41		41	13	1	81
489922_3765_1461	122	CTT	AAG	91		113		23	7	91	9
000691_3576_0239	123	TG	AC	61		105		45	22	61	18
000691_3576_0239	123	GA	AG	110		117		8	4	110	6
018775_1213_2134	123	GCAACA	AACAGC	5		34		30	5	5	89
146655_1163_1220	123	AG	AG	67		97		31	15	67	26
146655_1163_1220	123	AG	AG	103		119		17	8	103	4
169614_1277_1852	123	CAA	AAC	6		19		14	4	6	104
201851_2860_2392	123	TTC	AAG	13		36		24	8	13	87
201851_2860_2392	123	TTC	AAG	51		105		55	18	51	18
201851_2860_2392	123	CT	AG	106		118		13	6	106	5
287377_3030_3484	123	GA	AG	56		123		68	34	56	0
371346_2260_3557	123	GT	AC	24		77		54	27	24	46
371346_2260_3557	123	GT	AC	79		116		38	19	79	7
371346_2260_3557	123	TA	AT	9		23		15	7	9	100
382055_3007_3084	123	CT	AG	18		31		14	7	18	92
002274_1694_3661	124	TCT	AAG	18		34		17	5	18	90
[truncated: 2,387 more rows]

## Sheet: Gene related SSRs
Details of SSR motifs identified in gene-space related sequence reads (SRs)
Number of sequence reads analysed		7162		Distance of SSR from either end					All gene related sequence reads		30118
Average read length; bp		214.471		>=40 bp		>=30 bp
			SSR motifs in usable position	4670	49.0 %	5623	59.0 %
			Sequence reads with at least one usable SSR motif	3958	55.3 %	4641	64.8 %
Number of SRs	Number of motifs
7162	9526
Sequence Name	Length; bp	SSR motif	SSR Motif_Standardised	SSR Start; bp		SSR End; bp		SSR Length; bp	SSR Repetitions	SSR disatnce upstream; bp	SSR distance downsream; bp
286072_3159_0213	51	TGC	AGC	4		20		17	5	4	31
365316_2134_1590	54	TGT	AAC	37		53		17	5	37	1
216820_2663_2773	56	TGT	AAC	1		13		13	4	1	43
108387_1656_1710	56	TGT	AAC	17		28		12	4	17	28
138102_2435_3309	56	TTG	AAC	1		27		27	9	1	29
216820_2663_2773	56	TGT	AAC	25		38		14	4	25	18
275803_0625_3811	57	AG	AG	45		52		8	4	45	5
423910_0494_1810	57	CTT	AAG	1		13		13	4	1	44
423910_0494_1810	57	TCT	AAG	42		53		12	4	42	4
379541_0178_2194	57	TCCTTC	AAGGAG	33		51		19	3	33	6
013063_1323_1032	57	GCG	CCG	29		43		15	5	29	14
275803_0625_3811	57	AGA	AAG	25		43		19	6	25	14
100612_2232_3089	58	CAG	AGC	40		58		19	6	40	0
166061_3703_2239	58	TGT	AAC	40		56		17	5	40	2
025220_1327_2082	58	AG	AG	32		58		27	13	32	0
038293_3934_0423	58	AT	AT	1		26		26	13	1	32
047765_0319_2048	58	GCA	AGC	5		23		19	6	5	35
110021_3207_1766	58	AAG	AAG	32		47		16	5	32	11
326345_1553_3530	58	GT	AC	1		26		26	13	1	32
113096_3729_1355	58	GAA	AAG	24		40		17	5	24	18
161181_0461_0065	58	AG	AG	28		43		16	8	28	15
306668_4051_1503	58	GA	AG	27		47		21	10	27	11
365034_2555_0830	58	TCCTCT	AAGAGG	22		41		20	3	22	17
416393_0059_3708	58	TATG	ATAC	25		38		14	3	25	20
088887_3417_1546	59	AT	AT	41		59		19	9	41	0
008551_1089_2179	59	AG	AG	1		27		27	13	1	32
012732_4046_0347	59	AG	AG	9		20		12	6	9	39
089607_0784_0673	59	AG	AG	35		53		19	9	35	6
151539_3633_2959	59	CAACAG	AACAGC	30		52		23	3	30	7
205889_0284_2939	59	CT	AG	35		42		8	4	35	17
012732_4046_0347	59	GA	AG	22		36		15	7	22	23
253330_3759_3243	59	TTC	AAG	11		39		29	9	11	20
003669_1453_3137	60	CTT	AAG	1		12		12	4	1	48
167815_1539_3686	60	TA	AT	1		8		8	4	1	52
423535_0618_3401	60	TC	AG	1		11		11	5	1	49
088473_1951_1570	60	TGTT	AAAC	39		51		13	3	39	9
098680_4008_3737	60	AG	AG	1		29		29	14	1	31
153761_1153_1505	60	GAA	AAG	32		48		17	5	32	12
234825_3060_1133	60	CT	AG	20		27		8	4	20	33
298316_0115_0133	60	AAG	AAG	10		22		13	4	10	38
102424_2937_2419	60	AAC	AAC	12		35		24	8	12	25
178842_3639_3035	60	CAG	AGC	25		47		23	7	25	13
212684_2545_3297	61	CT	AG	46		61		16	8	46	0
360115_1410_3285	61	CCGCG	CCGCG	43		60		18	3	43	1
397641_3797_3735	61	TC	AG	43		50		8	4	43	11
008786_1137_0610	61	CCT	AGG	30		45		16	5	30	16
038343_2694_2603	61	AGG	AGG	3		25		23	7	3	36
130286_2281_2315	61	TGTT	AAAC	39		51		13	3	39	10
177072_0655_2155	61	CA	AC	1		23		23	11	1	38
348520_1682_3757	61	TG	AC	35		61		27	13	35	0
359994_0496_1947	61	AT	AT	34		59		26	13	34	2
374755_0265_2868	61	AGA	AAG	31		45		15	5	31	16
374755_0265_2868	61	AGA	AAG	17		28		12	4	17	33
032367_2633_1016	61	TA	AT	25		49		25	12	25	12
137407_2315_1674	61	AC	AC	25		32		8	4	25	29
181961_0167_2909	61	GAA	AAG	22		43		22	7	22	18
212684_2545_3297	61	TC	AG	23		36		14	7	23	25
357399_1994_2317	61	A	A	29		36		8	8	29	25
360115_1410_3285	61	CTC	AGG	25		36		12	4	25	25
469117_0896_2300	61	GA	AG	17		44		28	14	17	17
005920_2172_0101	62	GA	AG	10		21		12	6	10	41
219875_0170_1500	62	AGA	AAG	47		58		12	4	47	4
401717_1514_2371	62	TC	AG	49		62		14	7	49	0
465265_1308_3920	62	AG	AG	11		21		11	5	11	41
465265_1308_3920	62	AG	AG	40		57		18	9	40	5
123679_0456_2408	62	AGA	AAG	39		62		24	8	39	0
259548_3192_3015	62	GA	AG	1		24		24	12	1	38
343570_0503_0206	62	GT	AC	24		32		9	4	24	30
434423_2379_3925	62	TG	AC	30		39		10	5	30	23
176447_0594_3041	62	TC	AG	18		40		23	11	18	22
185124_2358_1865	62	AG	AG	9		34		26	13	9	28
219875_0170_1500	62	AGA	AAG	26		39		14	4	26	23
027276_0261_1343	63	A	A	15		22		8	8	15	41
051945_0592_2679	63	GAA	AAG	45		63		19	6	45	0
109283_0191_3973	63	TGT	AAC	2		15		14	4	2	48
109283_0191_3973	63	TTG	AAC	47		63		17	5	47	0
214658_3752_1513	63	TTG	AAC	11		22		12	4	11	41
214658_3752_1513	63	GTT	AAC	46		58		13	4	46	5
252409_3455_2079	63	TTTC	AAAG	8		20		13	3	8	43
252409_3455_2079	63	AG	AG	41		52		12	6	41	11
337027_1360_0961	63	GA	AG	52		63		12	6	52	0
459567_0621_3601	63	GT	AC	1		14		14	7	1	49
485992_1289_0744	63	AG	AG	55		62		8	4	55	1
062867_0524_2509	63	GAA	AAG	32		48		17	5	32	15
080149_1676_3294	63	TGT	AAC	33		44		12	4	33	19
088549_1666_2597	63	GAA	AAG	32		48		17	5	32	15
158730_3536_3750	63	CA	AC	36		62		27	13	36	1
332844_3999_2963	63	AG	AG	39		58		20	10	39	5
355021_0311_3832	63	CT	AG	1		27		27	13	1	36
459567_0621_3601	63	TG	AC	34		50		17	8	34	13
015697_2606_1752	63	TC	AG	25		44		20	10	25	19
155840_0463_1003	63	CAG	AGC	25		47		23	7	25	16
244734_3251_3263	63	TGTTGC	AACAGC	28		50		23	3	28	13
041950_3899_2831	64	GA	AG	44		60		17	8	44	4
074113_0557_1409	64	GA	AG	46		54		9	4	46	10
089391_3366_3571	64	TG	AC	9		22		14	7	9	42
092834_1912_2748	64	CAA	AAC	50		63		14	4	50	1
255753_1607_1136	64	TC	AG	40		59		20	10	40	5
403063_0352_1627	64	G	C	43		54		12	12	43	10
413850_3123_3379	64	AC	AC	44		54		11	5	44	10
438126_3705_2186	64	T	A	47		55		9	9	47	9
033470_2260_0664	64	AAC	AAC	10		25		16	5	10	39
053536_0195_2610	64	T	A	19		26		8	8	19	38
074113_0557_1409	64	GA	AG	12		26		15	7	12	38
199550_1726_3426	64	AG	AG	37		64		28	14	37	0
362632_3126_3428	64	C	C	22		32		11	11	22	32
364643_0251_3772	64	GA	AG	32		59		28	14	32	5
452027_2115_0286	64	TA	AT	35		46		12	6	35	18
089391_3366_3571	64	AG	AG	23		39		17	8	23	25
403063_0352_1627	64	TG	AC	25		36		12	6	25	28
029109_3157_1292	65	AT	AT	51		58		8	4	51	7
040385_3204_0530	65	GTT	AAC	49		65		17	5	49	0
147462_3194_4028	65	AGA	AAG	9		22		14	4	9	43
207131_2363_3401	65	CT	AG	41		54		14	7	41	11
330027_3572_1268	65	TA	AT	3		10		8	4	3	55
442627_0545_3075	65	TC	AG	7		15		9	4	7	50
058619_3622_1326	65	TCTCT	AAGAG	38		62		25	5	38	3
130348_1815_3832	65	CA	AC	30		39		10	5	30	26
130348_1815_3832	65	AT	AT	11		29		19	9	11	36
133410_1065_1027	65	CCT	AGG	19		32		14	4	19	33
257929_3951_1466	65	AG	AG	37		65		29	14	37	0
114532_1170_0940	65	CTA	ACT	17		42		26	8	17	23
229770_1247_3380	66	TTC	AAG	1		16		16	5	1	50
229770_1247_3380	66	CTT	AAG	48		61		14	4	48	5
356324_0655_1715	66	CTT	AAG	51		66		16	5	51	0
369463_2320_1959	66	AC	AC	1		9		9	4	1	57
369463_2320_1959	66	GA	AG	10		25		16	8	10	41
013978_1714_1395	66	TCTCT	AAGAG	38		66		29	5	38	0
162863_3265_2506	66	GA	AG	32		62		31	15	32	4
356687_3396_2214	66	CCGT	ACGG	22		35		14	3	22	31
027992_1440_1544	66	AGA	AAG	23		38		16	5	23	28
056541_2324_3220	66	AG	AG	27		58		32	16	27	8
059394_2666_3112	66	GA	AG	16		43		28	14	16	23
214609_2567_3691	66	GA	AG	27		54		28	14	27	12
052357_3612_3030	67	TC	AG	13		20		8	4	13	47
053298_1005_2788	67	TA	AT	44		52		9	4	44	15
057560_0919_0849	67	CT	AG	16		25		10	5	16	42
062567_2215_1960	67	GAG	AGG	42		53		12	4	42	14
097009_1442_3662	67	GA	AG	12		22		11	5	12	45
116039_3867_1353	67	CA	AC	11		20		10	5	11	47
157318_3358_3035	67	T	A	56		65		10	10	56	2
250592_3412_2878	67	GAG	AGG	9		20		12	4	9	47
261867_1231_3807	67	CT	AG	8		21		14	7	8	46
412060_1330_1789	67	TC	AG	15		27		13	6	15	40
429268_2808_2026	67	CAA	AAC	40		67		28	9	40	0
447439_1622_3739	67	A	A	8		15		8	8	8	52
057560_0919_0849	67	TC	AG	26		35		10	5	26	32
057560_0919_0849	67	CT	AG	38		45		8	4	38	22
261867_1231_3807	67	TC	AG	33		51		19	9	33	16
368931_2416_1470	67	AC	AC	26		33		8	4	26	34
412060_1330_1789	67	TTGC	AAGC	36		49		14	3	36	18
442628_0217_3658	67	TTC	AAG	6		29		24	8	6	38
062567_2215_1960	67	AGA	AAG	28		41		14	4	28	26
065928_3661_1967	67	CTTCTC	AAGGAG	29		48		20	3	29	19
097009_1442_3662	67	GA	AG	28		39		12	6	28	28
198487_3310_1211	67	GA	AG	25		56		32	16	25	11
002910_0838_3713	68	TC	AG	47		62		16	8	47	6
006687_1330_2636	68	TG	AC	4		18		15	7	4	50
018916_1122_3512	68	CT	AG	10		18		9	4	10	50
019413_3029_1819	68	TCT	AAG	45		68		24	8	45	0
019628_1937_0108	68	TA	AT	46		54		9	4	46	14
044952_3811_1829	68	G	C	45		53		9	9	45	15
095482_1340_3088	68	CT	AG	48		65		18	9	48	3
138340_2437_0506	68	AC	AC	58		66		9	4	58	2
138340_2437_0506	68	CT	AG	50		57		8	4	50	11
196105_2168_3661	68	TG	AC	9		22		14	7	9	46
247498_2685_2134	68	T	A	20		28		9	9	20	40
262276_1684_0618	68	TA	AT	49		59		11	5	49	9
408484_1499_0173	68	AT	AT	15		25		11	5	15	43
421136_0345_3989	68	AAG	AAG	13		26		14	4	13	42
421136_0345_3989	68	AAG	AAG	43		59		17	5	43	9
002910_0838_3713	68	TC	AG	21		37		17	8	21	31
018916_1122_3512	68	T	A	33		40		8	8	33	28
138340_2437_0506	68	CT	AG	27		35		9	4	27	33
149529_1385_3665	68	GAA	AAG	36		54		19	6	36	14
262239_3624_0793	68	TA	AT	35		66		32	16	35	2
365935_3305_3419	68	C	C	37		46		10	10	37	22
414372_1238_0961	68	GA	AG	16		37		22	11	16	31
196105_2168_3661	68	AG	AG	23		39		17	8	23	29
003131_1195_2092	69	C	C	4		12		9	9	4	57
021191_1177_1260	69	AC	AC	43		57		15	7	43	12
022331_1149_1012	69	AC	AC	43		57		15	7	43	12
035524_2622_3208	69	TA	AT	44		68		25	12	44	1
061461_3804_0087	69	AT	AT	7		15		9	4	7	54
106469_2772_3535	69	TCT	AAG	1		29		29	9	1	40
172526_0308_1217	69	AGAA	AAAG	57		69		13	3	57	0
176057_3882_3334	69	AG	AG	54		69		16	8	54	0
269966_0683_1443	69	TA	AT	62		69		8	4	62	0
337878_3756_1521	69	TA	AT	40		64		25	12	40	5
453510_1358_2320	69	A	A	41		48		8	8	41	21
505376_0597_2510	69	TGT	AAC	56		69		14	4	56	0
000986_1407_2104	69	AAG	AAG	9		32		24	8	9	37
083028_2609_0772	69	GA	AG	35		54		20	10	35	15
098475_1261_2247	69	AAAGA	AAAAG	31		53		23	4	31	16
172526_0308_1217	69	AGAA	AAAG	33		45		13	3	33	24
357635_2936_0616	69	TG	AC	36		69		34	17	36	0
454328_2396_2455	69	TC	AG	38		45		8	4	38	24
021191_1177_1260	69	TC	AG	25		42		18	9	25	27
022331_1149_1012	69	TC	AG	25		42		18	9	25	27
342130_3209_3099	69	AC	AC	25		54		30	15	25	15
029736_2297_2569	70	TCT	AAG	1		29		29	9	1	41
067494_3163_3712	70	TC	AG	47		70		24	12	47	0
090227_0121_2135	70	GA	AG	51		63		13	6	51	7
099034_2477_2250	70	AC	AC	44		55		12	6	44	15
101124_1799_3399	70	AAG	AAG	52		70		19	6	52	0
271151_2149_2434	70	AG	AG	48		70		23	11	48	0
296786_1105_1181	70	AT	AT	41		69		29	14	41	1
417463_3736_0924	70	AT	AT	14		21		8	4	14	49
441545_3378_3991	70	A	A	62		69		8	8	62	1
002891_1607_3485	70	TCT	AAG	30		41		12	4	30	29
067494_3163_3712	70	TC	AG	37		45		9	4	37	25
099034_2477_2250	70	AC	AC	22		38		17	8	22	32
211438_0629_3868	70	CTT	AAG	1		33		33	11	1	37
271151_2149_2434	70	A	A	36		44		9	9	36	26
379187_2542_4055	70	TTCTC	AAGAG	34		52		19	3	34	18
396954_3692_1335	70	TA	AT	28		53		26	13	28	17
096020_1473_0120	71	TA	AT	1		29		29	14	1	42
234145_3351_1873	71	TA	AT	48		66		19	9	48	5
288455_2336_1577	71	TC	AG	51		58		8	4	51	13
288455_2336_1577	71	CTC	AGG	56		71		16	5	56	0
382225_3398_1246	71	GT	AC	35		42		8	4	35	29
440036_0650_3116	71	AG	AG	20		45		26	13	20	26
012535_0951_2766	72	AG	AG	48		55		8	4	48	17
090527_2592_0390	72	A	A	11		18		8	8	11	54
102371_3756_3027	72	TG	AC	2		11		10	5	2	61
102371_3756_3027	72	GT	AC	12		22		11	5	12	50
102371_3756_3027	72	AG	AG	23		32		10	5	23	40
156464_1714_0313	72	GT	AC	59		66		8	4	59	6
212816_2374_1008	72	CT	AG	57		69		13	6	57	3
252852_3662_3369	72	CAA	AAC	1		18		18	6	1	54
278382_3680_0942	72	GAC	ACG	40		55		16	5	40	17
289741_3411_2586	72	TC	AG	46		61		16	8	46	11
292868_2419_1641	72	TC	AG	48		71		24	12	48	1
309647_0342_2224	72	CTC	AGG	12		25		14	4	12	47
329899_3286_0481	72	CTC	AGG	12		25		14	4	12	47
005778_1079_3291	72	TATC	ATAG	39		65		27	6	39	7
011971_3719_2514	72	TCA	ATC	7		35		29	9	7	37
012535_0951_2766	72	AG	AG	22		36		15	7	22	36
012535_0951_2766	72	AG	AG	38		46		9	4	38	26
150170_1524_2868	72	TTC	AAG	29		40		12	4	29	32
208034_2247_2086	72	T	A	37		46		10	10	37	26
371373_1229_2655	72	TA	AT	31		65		35	17	31	7
243454_2155_3325	73	TA	AT	34		42		9	4	34	31
005392_1700_2254	73	TA	AT	58		66		9	4	58	7
035148_2291_1706	73	AAG	AAG	58		73		16	5	58	0
094665_2888_0056	73	T	A	1		8		8	8	1	65
169976_3247_0874	73	G	C	52		67		16	16	52	6
230379_3686_2992	73	TA	AT	52		60		9	4	52	13
243454_2155_3325	73	AT	AT	18		33		16	8	18	40
249354_1494_0550	73	AT	AT	10		20		11	5	10	53
273114_2593_3168	73	GA	AG	63		73		11	5	63	0
274854_2143_0380	73	AG	AG	64		73		10	5	64	0
302172_1907_1154	73	CA	AC	54		66		13	6	54	7
302172_1907_1154	73	C	C	16		27		12	12	16	46
353975_3062_2683	73	CT	AG	17		24		8	4	17	49
359809_0943_1047	73	AT	AT	6		16		11	5	6	57
367650_2845_0319	73	AG	AG	1		8		8	4	1	65
367650_2845_0319	73	GA	AG	11		21		11	5	11	52
367650_2845_0319	73	AG	AG	54		61		8	4	54	12
020517_3698_2953	73	TTG	AAC	26		37		12	4	26	36
035148_2291_1706	73	AGAA	AAAG	36		47		12	3	36	26
182760_3567_0284	73	CTC	AGG	33		44		12	4	33	29
302172_1907_1154	73	AC	AC	29		38		10	5	29	35
353975_3062_2683	73	TC	AG	26		38		13	6	26	35
419286_1435_2091	73	TG	AC	36		70		35	17	36	3
008597_1384_1813	73	GT	AC	23		54		32	16	23	19
052319_0361_0364	73	GA	AG	20		55		36	18	20	18
290544_0261_0665	73	AC	AC	25		54		30	15	25	19
345475_1190_2546	74	T	A	35		42		8	8	35	32
122287_3040_4050	74	TA	AT	57		64		8	4	57	10
134469_1848_1896	74	C	C	61		73		13	13	61	1
144066_0224_0736	74	TA	AT	48		56		9	4	48	18
185047_0368_0395	74	TA	AT	46		56		11	5	46	18
187546_1089_2892	74	AT	AT	2		14		13	6	2	60
191507_0982_2063	74	GGGAG	AGGGG	2		22		21	4	2	52
209494_1070_3658	74	GAA	AAG	11		22		12	4	11	52
209494_1070_3658	74	GAA	AAG	58		74		17	5	58	0
295333_0811_3777	74	CT	AG	17		24		8	4	17	50
337616_1549_3577	74	AG	AG	45		74		30	15	45	0
345475_1190_2546	74	CT	AG	44		59		16	8	44	15
345475_1190_2546	74	TC	AG	61		70		10	5	61	4
375180_0597_1382	74	AT	AT	40		73		34	17	40	1
401652_2233_1584	74	GT	AC	42		73		32	16	42	1
404670_2708_1887	74	TA	AT	43		74		32	16	43	0
094305_0233_1235	74	TA	AT	35		64		30	15	35	10
156499_3963_2026	74	AAC	AAC	38		54		17	5	38	20
202511_3135_2593	74	AG	AG	37		66		30	15	37	8
266997_1492_0170	74	AG	AG	37		66		30	15	37	8
325393_1380_3802	74	GT	AC	16		36		21	10	16	38
325393_1380_3802	74	GT	AC	38		48		11	5	38	26
148982_0283_2538	75	AG	AG	30		43		14	7	30	32
468976_0657_3890	75	CT	AG	32		39		8	4	32	36
019341_3764_2129	75	GAA	AAG	45		68		24	8	45	7
037593_3211_0349	75	AG	AG	11		18		8	4	11	57
037593_3211_0349	75	AG	AG	22		35		14	7	22	40
133972_2112_0745	75	T	A	60		68		9	9	60	7
135442_0071_1357	75	A	A	1		8		8	8	1	67
148982_0283_2538	75	GA	AG	3		10		8	4	3	65
188387_0353_2765	75	GAA	AAG	1		12		12	4	1	63
195438_2874_0093	75	C	C	61		73		13	13	61	2
239608_0744_2769	75	GT	AC	42		71		30	15	42	4
252120_2219_0810	75	TA	AT	40		75		36	18	40	0
252447_0173_2360	75	A	A	67		74		8	8	67	1
281415_3102_1191	75	GT	AC	46		75		30	15	46	0
293184_1280_1077	75	AT	AT	8		21		14	7	8	54
313804_0928_2961	75	AGA	AAG	52		69		18	6	52	6
322726_3450_2251	75	TC	AG	67		75		9	4	67	0
372263_0595_2508	75	GTT	AAC	56		69		14	4	56	6
385513_0736_2015	75	TC	AG	49		75		27	13	49	0
468976_0657_3890	75	TC	AG	47		75		29	14	47	0
475683_1175_3799	75	TTC	AAG	60		72		13	4	60	3
003994_1475_1187	75	GGCCC	CCCGG	37		52		16	3	37	23
015409_1147_3565	75	GA	AG	19		44		26	13	19	31
060674_0670_0121	75	G	C	39		47		9	9	39	28
327498_1539_2974	75	AT	AT	35		66		32	16	35	9
345117_1114_4001	75	AT	AT	36		71		36	18	36	4
073271_0097_2280	75	GA	AG	25		50		26	13	25	25
028353_1179_3728	76	TC	AG	34		42		9	4	34	34
224448_3371_2876	76	CA	AC	30		37		8	4	30	39
004125_1196_1221	76	AGA	AAG	1		20		20	6	1	56
008441_0401_1717	76	AT	AT	62		70		9	4	62	6
028353_1179_3728	76	TC	AG	44		58		15	7	44	18
028353_1179_3728	76	CT	AG	25		32		8	4	25	44
029898_3369_3754	76	TCG	ACG	14		29		16	5	14	47
071386_1895_3252	76	G	C	28		36		9	9	28	40
228152_0046_2974	76	ACG	ACG	2		17		16	5	2	59
232838_3078_3603	76	AAAG	AAAG	55		67		13	3	55	9
255121_2406_3243	76	A	A	55		62		8	8	55	14
380355_0823_2954	76	A	A	28		36		9	9	28	40
026828_1737_0316	76	AT	AT	25		39		15	7	25	37
260081_1181_0769	76	CT	AG	36		67		32	16	36	9
121136_0687_3430	77	TC	AG	35		44		10	5	35	33
386066_0876_0895	77	AT	AT	37		44		8	4	37	33
020605_2183_2473	77	CTT	AAG	1		19		19	6	1	58
020605_2183_2473	77	CTCTTC	AAGAGG	20		37		18	3	20	40
077724_2654_0734	77	TC	AG	61		76		16	8	61	1
121136_0687_3430	77	TC	AG	59		73		15	7	59	4
286968_2140_2016	77	GTT	AAC	65		77		13	4	65	0
286968_2140_2016	77	TGT	AAC	44		64		21	7	44	13
295053_2645_2556	77	G	C	11		23		13	13	11	54
317801_3543_3913	77	G	C	10		23		14	14	10	54
352867_2149_0461	77	AT	AT	41		77		37	18	41	0
379332_4010_1517	77	A	A	68		76		9	9	68	1
379332_4010_1517	77	T	A	24		31		8	8	24	46
380898_1855_0793	77	GCG	CCG	19		31		13	4	19	46
397970_3028_0384	77	TTAT	AAAT	59		73		15	3	59	4
397970_3028_0384	77	TTA	AAT	40		52		13	4	40	25
380898_1855_0793	77	GCG	CCG	36		48		13	4	36	29
393826_3782_0961	77	GT	AC	35		64		30	15	35	13
132928_1826_0417	77	AG	AG	29		66		38	19	29	11
148521_3850_1204	78	GT	AC	40		47		8	4	40	31
015299_0923_0453	78	GA	AG	32		42		11	5	32	36
015299_0923_0453	78	TG	AC	15		27		13	6	15	51
015299_0923_0453	78	G	C	46		56		11	11	46	22
015342_2924_3431	78	GA	AG	22		29		8	4	22	49
019314_0561_0980	78	TTAT	AAAT	4		16		13	3	4	62
138943_0757_0571	78	TTC	AAG	58		70		13	4	58	8
166125_3925_3155	78	AG	AG	51		58		8	4	51	20
166125_3925_3155	78	AG	AG	41		49		9	4	41	29
166259_1304_2025	78	CCTC	AGGG	45		58		14	3	45	20
170646_3618_3750	78	T	A	24		32		9	9	24	46
206961_2387_2426	78	AG	AG	41		49		9	4	41	29
206961_2387_2426	78	AG	AG	51		58		8	4	51	20
210615_0214_1488	78	A	A	50		57		8	8	50	21
210615_0214_1488	78	GAA	AAG	9		20		12	4	9	58
210615_0214_1488	78	AAG	AAG	67		78		12	4	67	0
324602_2693_3037	78	GGT	ACC	8		20		13	4	8	58
469301_1313_1178	78	TA	AT	12		19		8	4	12	59
166125_3925_3155	78	GA	AG	28		39		12	6	28	39
206961_2387_2426	78	GA	AG	28		39		12	6	28	39
032878_3341_2676	79	GAA	AAG	32		48		17	5	32	31
420928_3273_3959	79	TA	AT	33		41		9	4	33	38
011997_1611_2014	79	TA	AT	59		69		11	5	59	10
028664_3419_1116	79	AT	AT	1		11		11	5	1	68
032716_1811_0829	79	TA	AT	52		79		28	14	52	0
038807_1518_0818	79	CT	AG	3		11		9	4	3	68
038807_1518_0818	79	CT	AG	54		79		26	13	54	0
203995_2017_3037	79	TA	AT	63		73		11	5	63	6
222527_3012_0847	79	GA	AG	46		65		20	10	46	14
236611_0456_0407	79	GT	AC	58		65		8	4	58	14
287235_3906_1931	79	AG	AG	41		79		39	19	41	0
363428_3919_2338	79	TA	AT	1		8		8	4	1	71
403366_3363_1722	79	ACCC	ACCC	7		21		15	3	7	58
410240_3733_2918	79	T	A	67		74		8	8	67	5
451188_1011_0219	79	TA	AT	62		79		18	9	62	0
471841_0128_3708	79	AG	AG	43		51		9	4	43	28
479817_0777_3968	79	T	A	62		69		8	8	62	10
067533_0163_2772	79	GA	AG	10		41		32	16	10	38
403366_3363_1722	79	CAA	AAC	28		41		14	4	28	38
354945_3760_3950	79	CA	AC	27		51		25	12	27	28
151670_3992_1438	80	T	A	39		46		8	8	39	34
190501_0163_3231	80	CAA	AAC	35		48		14	4	35	32
003921_1673_2785	80	GAA	AAG	19		38		20	6	19	42
003921_1673_2785	80	AGA	AAG	43		54		12	4	43	26
010195_0839_1648	80	AC	AC	70		78		9	4	70	2
026557_1328_1337	80	TTGC	AAGC	53		64		12	3	53	16
056860_3234_2103	80	CT	AG	73		80		8	4	73	0
066091_2449_3695	80	TC	AG	48		80		33	16	48	0
151670_3992_1438	80	T	A	48		55		8	8	48	25
151670_3992_1438	80	CT	AG	1		10		10	5	1	70
173259_0148_4008	80	TA	AT	7		14		8	4	7	66
173586_2324_3547	80	GA	AG	43		54		12	6	43	26
173586_2324_3547	80	AG	AG	56		80		25	12	56	0
296493_1824_1132	80	TC	AG	21		35		15	7	21	45
371040_1715_2890	80	A	A	61		68		8	8	61	12
399851_0580_3113	80	TTC	AAG	53		64		12	4	53	16
406329_0085_1048	80	TACA	ATAC	19		31		13	3	19	49
001242_3850_1776	80	CAACAG	AACAGC	31		54		24	4	31	26
056860_3234_2103	80	CT	AG	34		51		18	9	34	29
013373_1399_3092	81	AG	AG	35		46		12	6	35	35
189960_1086_1875	81	CT	AG	36		50		15	7	36	31
000321_1406_3256	81	GA	AG	66		80		15	7	66	1
013373_1399_3092	81	AG	AG	57		65		9	4	57	16
013373_1399_3092	81	AG	AG	66		77		12	6	66	4
034369_3501_2206	81	AC	AC	44		81		38	19	44	0
044540_1739_3497	81	CT	AG	3		11		9	4	3	70
044540_1739_3497	81	CT	AG	54		81		28	14	54	0
167723_3846_2420	81	A	A	64		72		9	9	64	9
167723_3846_2420	81	A	A	74		81		8	8	74	0
189960_1086_1875	81	CT	AG	60		67		8	4	60	14
237592_1722_1559	81	GA	AG	48		81		34	17	48	0
256163_2888_3910	81	TA	AT	1		8		8	4	1	73
256163_2888_3910	81	TA	AT	18		25		8	4	18	56
266100_1063_0911	81	C	C	67		80		14	14	67	1
391381_2606_2298	81	TA	AT	51		80		30	15	51	1
007225_0950_1567	82	TG	AC	43		54		12	6	43	28
007225_0950_1567	82	G	C	61		74		14	14	61	8
056436_3681_1165	82	TTGCTG	AACAGC	1		39		39	6	1	43
109289_3621_1232	82	AC	AC	64		73		10	5	64	9
186819_1725_1045	82	GT	AC	71		82		12	6	71	0
255840_1029_0632	82	AAGAG	AAGAG	50		65		16	3	50	17
256896_2677_0643	82	GA	AG	45		82		38	19	45	0
281848_1690_2779	82	TG	AC	66		73		8	4	66	9
281848_1690_2779	82	AG	AG	74		82		9	4	74	0
303032_0634_3202	82	TA	AT	52		61		10	5	52	21
388887_1187_0130	82	TC	AG	12		22		11	5	12	60
400322_3042_3714	82	CTC	AGG	50		63		14	4	50	19
433297_0502_2543	82	CA	AC	48		67		20	10	48	15
433297_0502_2543	82	TC	AG	15		22		8	4	15	60
433297_0502_2543	82	TC	AG	29		36		8	4	29	46
004866_4013_0325	83	GAA	AAG	32		48		17	5	32	35
018906_3781_0492	83	TA	AT	56		64		9	4	56	19
048742_2328_3071	83	G	C	58		71		14	14	58	12
053921_3052_0733	83	AT	AT	26		33		8	4	26	50
075784_0417_2332	83	AC	AC	10		17		8	4	10	66
120705_0979_1584	83	TC	AG	63		70		8	4	63	13
202506_2534_0451	83	ATTA	AATT	9		30		22	5	9	53
396582_1253_1232	83	AAC	AAC	40		70		31	10	40	13
049270_0705_2552	84	AGT	ACT	31		44		14	4	31	40
128301_3784_0467	84	AC	AC	30		51		22	11	30	33
006950_2162_2123	84	GT	AC	48		76		29	14	48	8
006950_2162_2123	84	CG	CG	77		84		8	4	77	0
015915_1696_2374	84	AT	AT	18		26		9	4	18	58
019623_2359_1581	84	TA	AT	21		28		8	4	21	56
023357_0957_1047	84	A	A	3		10		8	8	3	74
023357_0957_1047	84	AT	AT	48		61		14	7	48	23
031837_2645_1876	84	AC	AC	44		81		38	19	44	3
041838_1590_4039	84	CT	AG	1		9		9	4	1	75
049270_0705_2552	84	GTA	ACT	3		24		22	7	3	60
058356_3241_3642	84	T	A	68		75		8	8	68	9
058356_3241_3642	84	AC	AC	59		67		9	4	59	17
060279_1143_2088	84	TG	AC	76		84		9	4	76	0
060279_1143_2088	84	TC	AG	48		66		19	9	48	18
075717_1354_3994	84	TAT	AAT	46		84		39	13	46	0
082584_1864_0705	84	GGC	CCG	7		20		14	4	7	64
088757_0061_1875	84	GC	CG	65		72		8	4	65	12
090540_2691_0803	84	TA	AT	66		76		11	5	66	8
109590_0600_1176	84	TC	AG	69		76		8	4	69	8
109590_0600_1176	84	TC	AG	59		67		9	4	59	17
114940_0744_0195	84	TCA	ATC	12		43		32	10	12	41
125283_3852_1799	84	TC	AG	67		74		8	4	67	10
128301_3784_0467	84	TC	AG	52		69		18	9	52	15
160077_2782_3339	84	GA	AG	59		81		23	11	59	3
260407_0221_3669	84	C	C	63		76		14	14	63	8
371790_2957_3252	84	AT	AT	51		59		9	4	51	25
389826_2019_1269	84	GT	AC	66		73		8	4	66	11
396756_3805_2266	84	CT	AG	68		78		11	5	68	6
462265_3595_3125	84	CTT	AAG	16		38		23	7	16	46
198151_2447_3849	84	TTC	AAG	34		55		22	7	34	29
395938_1097_0592	84	GA	AG	39		61		23	11	39	23
039248_2296_1244	85	GC	CG	45		52		8	4	45	33
276191_1100_1622	85	A	A	46		55		10	10	46	30
297318_0920_1740	85	AT	AT	34		41		8	4	34	44
044648_3324_3380	85	TA	AT	51		59		9	4	51	26
079253_2306_0598	85	ATA	AAT	1		13		13	4	1	72
124860_0682_2783	85	CA	AC	24		40		17	8	24	45
124860_0682_2783	85	CA	AC	7		19		13	6	7	66
125409_2747_1933	85	AT	AT	48		85		38	19	48	0
131289_3761_0531	85	AT	AT	1		8		8	4	1	77
131289_3761_0531	85	TA	AT	14		26		13	6	14	59
131382_3255_3731	85	GA	AG	73		83		11	5	73	2
136166_0613_0595	85	TA	AT	47		83		37	18	47	2
165038_0496_0796	85	GA	AG	78		85		8	4	78	0
165038_0496_0796	85	GA	AG	52		59		8	4	52	26
165038_0496_0796	85	GGC	CCG	19		31		13	4	19	54
200155_3268_3956	85	TCT	AAG	1		41		41	13	1	44
276191_1100_1622	85	A	A	62		70		9	9	62	15
276191_1100_1622	85	A	A	73		81		9	9	73	4
316332_1469_3713	85	TA	AT	42		77		36	18	42	8
330273_3625_0976	85	GA	AG	61		85		25	12	61	0
344413_2203_0070	85	G	C	63		78		16	16	63	7
362922_1660_2273	85	GAA	AAG	55		76		22	7	55	9
365257_3809_3674	85	AG	AG	69		78		10	5	69	7
365257_3809_3674	85	GA	AG	50		67		18	9	50	18
466786_0086_2978	85	TA	AT	66		73		8	4	66	12
388200_0474_0511	86	GA	AG	41		53		13	6	41	33
171160_2580_0755	86	AAG	AAG	34		47		14	4	34	39
057189_0415_1311	86	AAAG	AAAG	75		86		12	3	75	0
081382_0245_0409	86	A	A	24		33		10	10	24	53
081382_0245_0409	86	AG	AG	76		85		10	5	76	1
171160_2580_0755	86	GAA	AAG	62		79		18	6	62	7
263140_1261_2004	86	GA	AG	54		61		8	4	54	25
388200_0474_0511	86	AG	AG	68		77		10	5	68	9
388200_0474_0511	86	GA	AG	11		23		13	6	11	63
425920_1488_2644	87	A	A	35		44		10	10	35	43
432520_1002_0491	87	T	A	32		39		8	8	32	48
000437_1404_1817	87	TTC	AAG	36		53		18	6	36	34
000437_1404_1817	87	CTT	AAG	1		24		24	8	1	63
003938_1172_3778	87	AT	AT	4		12		9	4	4	75
017393_1715_3278	87	CT	AG	22		30		9	4	22	57
017393_1715_3278	87	TC	AG	54		61		8	4	54	26
026617_3340_0276	87	GAA	AAG	59		71		13	4	59	16
067248_3981_2984	87	AG	AG	66		77		12	6	66	10
087290_0038_3613	87	GA	AG	75		85		11	5	75	2
138369_1191_2764	87	TGT	AAC	26		39		14	4	26	48
138369_1191_2764	87	GTT	AAC	57		69		13	4	57	18
149311_0727_2019	87	TG	AC	64		87		24	12	64	0
149311_0727_2019	87	GCGG	CCCG	49		61		13	3	49	26
181795_1870_3632	87	A	A	54		61		8	8	54	26
225308_3481_0984	87	AAG	AAG	74		87		14	4	74	0
249999_2742_2158	87	GA	AG	45		72		28	14	45	15
428549_2238_2988	87	AT	AT	46		86		41	20	46	1
249684_2244_2312	88	CT	AG	41		48		8	4	41	40
023387_2521_1707	88	CAA	AAC	42		53		12	4	42	35
024571_3492_2455	88	AG	AG	31		40		10	5	31	48
156544_1069_2461	88	GA	AG	38		46		9	4	38	42
254819_1507_2608	88	AAG	AAG	34		47		14	4	34	41
258479_2898_2697	88	AC	AC	49		58		10	5	49	30
258479_2898_2697	88	AC	AC	39		47		9	4	39	41
387654_1022_1677	88	CAAAG	AAAGC	43		58		16	3	43	30
398639_2974_2512	88	AG	AG	35		42		8	4	35	46
002603_2281_0424	88	AG	AG	47		80		34	17	47	8
024571_3492_2455	88	GA	AG	41		60		20	10	41	28
080403_2617_3237	88	TTC	AAG	4		16		13	4	4	72
119354_0195_1769	88	A	A	28		35		8	8	28	53
132501_0879_2917	88	AT	AT	57		88		32	16	57	0
156544_1069_2461	88	GA	AG	5		13		9	4	5	75
156544_1069_2461	88	GA	AG	52		61		10	5	52	27
201212_1046_1584	88	TA	AT	5		15		11	5	5	73
236755_2355_1089	88	GA	AG	1		19		19	9	1	69
250858_2117_0955	88	A	A	66		73		8	8	66	15
254597_0911_3914	88	AT	AT	52		84		33	16	52	4
254819_1507_2608	88	GAA	AAG	62		82		21	7	62	6
262592_0175_0698	88	AAG	AAG	75		88		14	4	75	0
307828_3716_2103	88	AG	AG	58		71		14	7	58	17
452686_2910_4014	88	A	A	60		67		8	8	60	21
299418_1601_2560	89	A	A	51		58		8	8	51	31
430143_1617_3921	89	CT	AG	48		58		11	5	48	31
006825_1613_2366	89	CCCTC	AGGGG	47		61		15	3	47	28
006825_1613_2366	89	GCCCC	CCCCG	1		15		15	3	1	74
022681_2295_1780	89	TTC	AAG	66		80		15	5	66	9
034407_0547_1103	89	T	A	17		25		9	9	17	64
128905_1332_1732	89	GT	AC	63		77		15	7	63	12
128905_1332_1732	89	G	C	81		89		9	9	81	0
171849_3343_0769	89	AAG	AAG	65		89		25	8	65	0
299418_1601_2560	89	AG	AG	68		76		9	4	68	13
430143_1617_3921	89	CT	AG	61		70		10	5	61	19
353520_2240_2579	89	AG	AG	32		71		40	20	32	18
003635_1173_1563	90	TGT	AAC	41		57		17	5	41	33
019106_1369_2786	90	T	A	44		51		8	8	44	39
093497_1025_2055	90	AGA	AAG	35		50		16	5	35	40
142698_0507_3659	90	GA	AG	41		60		20	10	41	30
142698_0507_3659	90	AG	AG	31		40		10	5	31	50
194108_2482_2356	90	T	A	52		59		8	8	52	31
017315_1131_1508	90	AGAAA	AAAAG	56		70		15	3	56	20
017315_1131_1508	90	AGA	AAG	73		90		18	6	73	0
019106_1369_2786	90	TTTCTT	AAAAAG	14		34		21	3	14	56
019106_1369_2786	90	TC	AG	2		9		8	4	2	81
027189_1473_0552	90	GA	AG	42		85		44	22	42	5
073931_3301_0184	90	GCC	CCG	67		79		13	4	67	11
093497_1025_2055	90	AGA	AAG	64		79		16	5	64	11
194108_2482_2356	90	T	A	17		24		8	8	17	66
220112_0978_0050	90	GA	AG	1		20		20	10	1	70
240195_0487_3023	90	GAA	AAG	64		90		27	9	64	0
259996_2393_0751	90	T	A	55		63		9	9	55	27
259996_2393_0751	90	T	A	72		80		9	9	72	10
261266_3512_1080	90	TC	AG	47		68		22	11	47	22
304551_3766_1997	90	C	C	14		21		8	8	14	69
346252_0501_2293	90	GA	AG	57		90		34	17	57	0
425911_3102_3401	90	TTC	AAG	14		43		30	10	14	47
435718_0115_3989	90	TA	AT	78		88		11	5	78	2
190642_3432_3733	90	GA	AG	36		78		43	21	36	12
202213_1436_3792	90	GA	AG	38		81		44	22	38	9
221646_1377_1634	90	TCA	ATC	23		54		32	10	23	36
022322_2255_2982	91	C	C	58		65		8	8	58	26
034923_3045_1621	91	GA	AG	70		77		8	4	70	14
072745_1679_3114	91	GAA	AAG	68		81		14	4	68	10
149440_3938_0846	91	GT	AC	64		71		8	4	64	20
162501_3515_2094	91	A	A	66		74		9	9	66	17
198943_1660_2114	91	AAAT	AAAT	70		82		13	3	70	9
046112_1767_1442	92	TC	AG	41		52		12	6	41	40
137765_3071_1140	92	A	A	38		46		9	9	38	46
256095_1527_1712	92	GAA	AAG	30		49		20	6	30	43
424388_1436_1143	92	GGCGGT	ACCGCC	40		62		23	3	40	30
026657_1361_3554	92	TA	AT	62		92		31	15	62	0
090653_1126_2426	92	TA	AT	74		86		13	6	74	6
137765_3071_1140	92	A	A	62		70		9	9	62	22
137765_3071_1140	92	A	A	75		83		9	9	75	9
228235_3749_3129	92	TG	AC	59		89		31	15	59	3
252441_0561_2124	92	TACA	ATAC	80		92		13	3	80	0
288017_2128_1617	92	TG	AC	47		90		44	22	47	2
440556_3302_2904	92	AC	AC	53		85		33	16	53	7
095145_2298_0504	93	AG	AG	30		38		9	4	30	55
121364_2407_2230	93	GAG	AGG	47		59		13	4	47	34
232445_2464_0502	93	TG	AC	46		57		12	6	46	36
341347_0774_3619	93	GAG	AGG	42		61		20	6	42	32
386082_3454_4017	93	GA	AG	50		57		8	4	50	36
008936_1682_3613	93	AC	AC	60		93		34	17	60	0
039347_0948_2437	93	AT	AT	18		26		9	4	18	67
042890_3514_1730	93	CT	AG	62		74		13	6	62	19
085433_1921_1623	93	G	C	29		41		13	13	29	52
095145_2298_0504	93	G	C	75		84		10	10	75	9
156574_2760_0051	93	AC	AC	60		81		22	11	60	12
156574_2760_0051	93	CA	AC	85		93		9	4	85	0
169876_2005_3311	93	A	A	63		70		8	8	63	23
232445_2464_0502	93	AG	AG	58		90		33	16	58	3
269651_0976_1704	93	TC	AG	44		65		22	11	44	28
269651_0976_1704	93	TC	AG	75		82		8	4	75	11
341347_0774_3619	93	AGG	AGG	8		24		17	5	8	69
363229_0443_0690	93	A	A	79		86		8	8	79	7
386082_3454_4017	93	AG	AG	63		93		31	15	63	0
413512_2658_3664	93	TCT	AAG	1		13		13	4	1	80
463952_0531_3002	93	A	A	83		91		9	9	83	2
298457_3339_3029	94	AG	AG	45		53		9	4	45	41
315090_0906_3497	94	GA	AG	43		54		12	6	43	40
148662_2642_2870	94	TGT	AAC	37		54		18	6	37	40
031908_2621_0150	94	CAAG	AAGC	83		94		12	3	83	0
044800_3818_4025	94	TA	AT	79		87		9	4	79	7
148662_2642_2870	94	GTT	AAC	74		89		16	5	74	5
162830_0311_0394	94	AAAAG	AAAAG	68		86		19	3	68	8
232952_3114_0990	94	TG	AC	47		88		42	21	47	6
240026_2818_3513	94	AG	AG	63		86		24	12	63	8
298457_3339_3029	94	AG	AG	57		84		28	14	57	10
315090_0906_3497	94	AG	AG	56		81		26	13	56	13
316039_1480_2580	94	TG	AC	63		70		8	4	63	24
322521_3984_3023	94	CA	AC	1		9		9	4	1	85
322521_3984_3023	94	CA	AC	11		28		18	9	11	66
322521_3984_3023	94	AC	AC	50		65		16	8	50	29
325009_3990_2693	94	AT	AT	8		18		11	5	8	76
337709_1599_0578	94	GAA	AAG	67		91		25	8	67	3
352650_1590_1322	94	AG	AG	24		46		23	11	24	48
352650_1590_1322	94	AG	AG	14		22		9	4	14	72
408517_3071_3441	94	TG	AC	47		90		44	22	47	4
412302_0785_3650	94	C	C	80		93		14	14	80	1
329604_2879_1143	95	TG	AC	34		41		8	4	34	54
420532_1453_3060	95	GA	AG	32		49		18	9	32	46
025662_0281_2102	95	T	A	67		74		8	8	67	21
025662_0281_2102	95	TA	AT	8		15		8	4	8	80
027250_2616_3980	95	TCT	AAG	26		44		19	6	26	51
027250_2616_3980	95	TTC	AAG	60		72		13	4	60	23
235832_3007_1146	95	AT	AT	67		93		27	13	67	2
235974_3522_0246	95	AT	AT	43		87		45	22	43	8
260479_3529_2952	95	GA	AG	81		94		14	7	81	1
260479_3529_2952	95	GA	AG	44		74		31	15	44	21
342676_3772_2426	95	T	A	8		16		9	9	8	79
418948_0457_3951	95	GAG	AGG	66		80		15	5	66	15
420532_1453_3060	95	GA	AG	70		83		14	7	70	12
468130_1937_1198	95	AT	AT	71		95		25	12	71	0
468130_1937_1198	95	TA	AT	25		45		21	10	25	50
007856_1108_1999	96	A	A	48		55		8	8	48	41
067806_1548_3872	96	TC	AG	47		54		8	4	47	42
302204_1682_3402	96	T	A	45		52		8	8	45	44
007856_1108_1999	96	A	A	58		65		8	8	58	31
039372_1269_1474	96	AG	AG	37		44		8	4	37	52
067806_1548_3872	96	TC	AG	35		45		11	5	35	51
198657_0977_3092	96	AGA	AAG	36		55		20	6	36	41
294799_0888_0672	96	TC	AG	49		58		10	5	49	38
007856_1108_1999	96	A	A	15		23		9	9	15	73
052906_1815_2543	96	AT	AT	2		10		9	4	2	86
198657_0977_3092	96	AGA	AAG	79		96		18	6	79	0
198876_2713_1587	96	AC	AC	49		92		44	22	49	4
295602_1431_3600	96	GA	AG	59		86		28	14	59	10
302204_1682_3402	96	T	A	83		90		8	8	83	6
302204_1682_3402	96	T	A	29		36		8	8	29	60
323651_2868_3976	96	T	A	83		90		8	8	83	6
373122_2318_0366	96	TC	AG	25		32		8	4	25	64
423483_1335_2820	96	AT	AT	48		81		34	17	48	15
497294_1743_3352	96	T	A	19		27		9	9	19	69
497294_1743_3352	96	G	C	28		55		28	28	28	41
115601_2277_1761	97	AG	AG	41		54		14	7	41	43
153688_0603_1383	97	CA	AC	46		53		8	4	46	44
154044_1974_0864	97	CGG	CCG	49		64		16	5	49	33
396331_0935_2846	97	CT	AG	56		63		8	4	56	34
416369_3438_2255	97	A	A	34		41		8	8	34	56
003043_2542_0120	97	AT	AT	7		14		8	4	7	83
008692_0938_2041	97	GA	AG	71		87		17	8	71	10
025876_3231_3049	97	AG	AG	48		80		33	16	48	17
066137_0926_0973	97	CT	AG	57		69		13	6	57	28
112732_3773_1102	97	TA	AT	1		8		8	4	1	89
112732_3773_1102	97	TA	AT	18		25		8	4	18	72
114246_0258_1845	97	AT	AT	73		82		10	5	73	15
115601_2277_1761	97	GA	AG	59		70		12	6	59	27
115601_2277_1761	97	AG	AG	72		91		20	10	72	6
119428_1945_2005	97	TC	AG	83		97		15	7	83	0
153688_0603_1383	97	CA	AC	5		12		8	4	5	85
153688_0603_1383	97	CA	AC	90		97		8	4	90	0
185283_1313_3809	97	TA	AT	51		90		40	20	51	7
203183_3453_1503	97	GA	AG	44		79		36	18	44	18
208411_1389_0970	97	TA	AT	64		95		32	16	64	2
209285_3258_2706	97	GA	AG	53		84		32	16	53	13
317586_1262_0080	97	AT	AT	59		92		34	17	59	5
353248_3713_2838	97	TA	AT	66		97		32	16	66	0
439417_3456_0055	97	C	C	83		97		15	15	83	0
161757_1929_3913	97	GA	AG	39		78		40	20	39	19
121352_2195_2405	98	T	A	41		48		8	8	41	50
057707_1356_2846	98	GA	AG	37		44		8	4	37	54
362278_1105_0769	98	TTC	AAG	39		52		14	4	39	46
468385_0718_3637	98	GT	AC	43		59		17	8	43	39
122761_3366_1251	98	AT	AT	1		8		8	4	1	90
184335_2284_0358	98	AT	AT	1		9		9	4	1	89
189965_1871_2259	98	A	A	9		19		11	11	9	79
190107_1918_0337	98	AG	AG	59		95		37	18	59	3
362278_1105_0769	98	TTC	AAG	7		24		18	6	7	74
438375_3245_3227	98	AG	AG	9		16		8	4	9	82
468385_0718_3637	98	TG	AC	18		25		8	4	18	73
468385_0718_3637	98	AG	AG	60		81		22	11	60	17
482768_1568_3320	98	CTT	AAG	82		95		14	4	82	3
482768_1568_3320	98	CTTCTG	AAGCAG	58		77		20	3	58	21
165814_2513_0736	99	CA	AC	41		48		8	4	41	51
262108_2239_2776	99	A	A	57		65		9	9	57	34
336991_0454_3056	99	TA	AT	49		61		13	6	49	38
065050_3206_2873	99	TA	AT	22		29		8	4	22	70
131691_3395_1509	99	AT	AT	79		86		8	4	79	13
182196_2651_1709	99	AT	AT	1		13		13	6	1	86
272238_2528_2179	99	AGA	AAG	82		99		18	6	82	0
340842_1758_0889	99	AAG	AAG	85		99		15	5	85	0
349095_2657_1740	99	C	C	57		73		17	17	57	26
231087_2551_3970	100	AC	AC	48		55		8	4	48	45
244096_1576_2483	100	CA	AC	42		50		9	4	42	50
253119_3031_3288	100	T	A	51		58		8	8	51	42
255671_2236_1655	100	AC	AC	44		57		14	7	44	43
417365_2207_3439	100	A	A	47		55		9	9	47	45
022492_1344_3524	100	TC	AG	37		44		8	4	37	56
049662_2953_0133	100	TGCA	ATGC	52		63		12	3	52	37
058087_2780_0625	100	CT	AG	37		53		17	8	37	47
231087_2551_3970	100	C	C	34		46		13	13	34	54
384328_2836_0631	100	AGC	AGC	46		63		18	6	46	37
417365_2207_3439	100	A	A	38		45		8	8	38	55
428758_1101_3593	100	CG	CG	57		67		11	5	57	33
438382_1627_2556	100	GA	AG	54		62		9	4	54	38
027116_2107_1229	100	GCAAT	AATGC	1		18		18	3	1	82
027835_1345_3077	100	TCT	AAG	1		27		27	9	1	73
027835_1345_3077	100	CTT	AAG	29		40		12	4	29	60
051862_1535_0211	100	AAG	AAG	63		79		17	5	63	21
051862_1535_0211	100	AAG	AAG	87		100		14	4	87	0
058087_2780_0625	100	AC	AC	54		77		24	12	54	23
058087_2780_0625	100	CT	AG	27		34		8	4	27	66
151024_3444_2994	100	CAA	AAC	12		34		23	7	12	66
221508_1012_0230	100	GT	AC	73		80		8	4	73	20
225925_1702_2938	100	G	C	89		100		12	12	89	0
231087_2551_3970	100	CA	AC	73		97		25	12	73	3
239649_2213_2019	100	T	A	9		20		12	12	9	80
244096_1576_2483	100	TC	AG	74		98		25	12	74	2
255671_2236_1655	100	AC	AC	73		90		18	9	73	10
417365_2207_3439	100	A	A	21		28		8	8	21	72
428758_1101_3593	100	AC	AC	68		93		26	13	68	7
459317_2823_3527	100	GA	AG	66		74		9	4	66	26
066794_0621_1749	101	AGG	AGG	43		55		13	4	43	46
279774_2656_0643	101	T	A	47		55		9	9	47	46
405360_3590_2454	101	TG	AC	40		50		11	5	40	51
020189_1628_3922	101	AT	AT	59		68		10	5	59	33
197735_0280_1104	101	TA	AT	61		68		8	4	61	33
222633_0422_1886	101	AC	AC	46		65		20	10	46	36
037868_0753_2828	101	GAGAGG	AGAGGG	23		42		20	3	23	59
038510_2156_0625	101	CT	AG	89		96		8	4	89	5
060735_2196_2131	101	TGT	AAC	62		90		29	9	62	11
066794_0621_1749	101	AGA	AAG	16		38		23	7	16	63
066794_0621_1749	101	AGA	AAG	89		101		13	4	89	0
069433_2744_2606	101	TCTCCC	AGAGGG	29		48		20	3	29	53
075938_2106_0741	101	TCT	AAG	63		79		17	5	63	22
105675_3308_3497	101	CTC	AGG	61		73		13	4	61	28
197735_0280_1104	101	AT	AT	69		101		33	16	69	0
211865_1568_0881	101	AAG	AAG	71		87		17	5	71	14
222633_0422_1886	101	CT	AG	25		45		21	10	25	56
224375_1062_1939	101	GT	AC	94		101		8	4	94	0
248870_2412_3303	101	G	C	87		98		12	12	87	3
268511_1998_1897	101	GT	AC	10		17		8	4	10	84
279774_2656_0643	101	T	A	23		31		9	9	23	70
318984_2506_1022	101	GT	AC	62		79		18	9	62	22
370158_2176_3342	101	AG	AG	19		26		8	4	19	75
405360_3590_2454	101	TG	AC	87		100		14	7	87	1
405360_3590_2454	101	GT	AC	17		31		15	7	17	70
440676_1065_3677	101	C	C	75		83		9	9	75	18
465336_1721_2898	101	AG	AG	87		94		8	4	87	7
247763_0063_2398	102	AT	AT	47		59		13	6	47	43
338998_3922_1798	102	T	A	52		60		9	9	52	42
381405_2785_0726	102	T	A	47		54		8	8	47	48
096665_0191_0396	102	TCC	AGG	54		67		14	4	54	35
164349_3035_2919	102	GT	AC	42		69		28	14	42	33
214908_2332_3647	102	TGT	AAC	43		64		22	7	43	38
344871_3732_2998	102	TG	AC	47		69		23	11	47	33
415935_3000_0855	102	AT	AT	56		63		8	4	56	39
009407_1442_1251	102	CG	CG	69		76		8	4	69	26
014519_2722_2058	102	AT	AT	95		102		8	4	95	0
073417_2441_2020	102	TA	AT	85		93		9	4	85	9
096665_0191_0396	102	TC	AG	77		84		8	4	77	18
100303_2667_0975	102	TA	AT	92		100		9	4	92	2
102977_1392_2932	102	ATC	ATC	67		78		12	4	67	24
159177_0975_2546	102	ACA	AAC	62		74		13	4	62	28
159177_0975_2546	102	AAC	AAC	76		100		25	8	76	2
164349_3035_2919	102	TG	AC	19		30		12	6	19	72
183585_3001_0634	102	GA	AG	57		102		46	23	57	0
239139_3789_3284	102	TC	AG	85		102		18	9	85	0
247763_0063_2398	102	AATA	AAAT	60		75		16	4	60	27
247763_0063_2398	102	TA	AT	76		83		8	4	76	19
338753_0718_0084	102	GA	AG	73		83		11	5	73	19
344871_3732_2998	102	TG	AC	12		19		8	4	12	83
432145_0747_3904	102	AC	AC	1		11		11	5	1	91
432145_0747_3904	102	AC	AC	25		38		14	7	25	64
233969_0559_3392	103	CG	CG	46		54		9	4	46	49
254151_3920_0943	103	TG	AC	41		51		11	5	41	52
485856_1228_3656	103	T	A	50		58		9	9	50	45
010791_1167_3442	103	GT	AC	37		44		8	4	37	59
166690_2651_3485	103	CT	AG	52		66		15	7	52	37
233969_0559_3392	103	TCCC	AGGG	30		44		15	3	30	59
254151_3920_0943	103	AG	AG	53		68		16	8	53	35
014826_3810_2585	103	TG	AC	54		85		32	16	54	18
014826_3810_2585	103	AG	AG	86		103		18	9	86	0
015215_0843_0514	103	AC	AC	21		29		9	4	21	74
015215_0843_0514	103	AC	AC	64		98		35	17	64	5
027658_3020_2072	103	TGT	AAC	87		103		17	5	87	0
033196_0322_0547	103	TG	AC	23		53		31	15	23	50
036616_1115_0286	103	GAA	AAG	19		30		12	4	19	73
091674_1195_1379	103	G	C	81		98		18	18	81	5
128282_1161_2073	103	GA	AG	53		84		32	16	53	19
153616_2872_2528	103	TG	AC	90		103		14	7	90	0
153616_2872_2528	103	TC	AG	54		88		35	17	54	15
160527_3702_2731	103	GCTT	AAGC	67		79		13	3	67	24
166690_2651_3485	103	CA	AC	81		93		13	6	81	10
203931_1207_1591	103	A	A	24		32		9	9	24	71
203931_1207_1591	103	GA	AG	69		97		29	14	69	6
205348_0376_3538	103	AG	AG	55		103		49	24	55	0
320633_2941_0617	103	GT	AC	42		75		34	17	42	28
381627_0681_1541	103	T	A	4		13		10	10	4	90
437041_0550_0930	103	AG	AG	88		95		8	4	88	8
442048_3652_1894	103	AG	AG	50		81		32	16	50	22
090021_3409_0264	104	GA	AG	46		57		12	6	46	47
180751_0122_2453	104	T	A	46		59		14	14	46	45
090021_3409_0264	104	AG	AG	35		44		10	5	35	60
332688_3487_1326	104	TA	AT	49		71		23	11	49	33
357714_4017_2723	104	T	A	31		38		8	8	31	66
402132_0326_2436	104	GT	AC	59		66		8	4	59	38
424090_2175_3016	104	GT	AC	60		70		11	5	60	34
090021_3409_0264	104	TG	AC	21		34		14	7	21	70
178735_3883_3475	104	TC	AG	87		104		18	9	87	0
180751_0122_2453	104	T	A	72		80		9	9	72	24
180751_0122_2453	104	T	A	82		93		12	12	82	11
180751_0122_2453	104	T	A	27		36		10	10	27	68
215162_0415_2833	104	AG	AG	71		100		30	15	71	4
302730_3029_3015	104	GT	AC	50		90		41	20	50	14
302730_3029_3015	104	GC	CG	96		104		9	4	96	0
383995_2504_0711	104	TA	AT	75		82		8	4	75	22
392574_0576_2509	104	AG	AG	82		103		22	11	82	1
392574_0576_2509	104	GA	AG	65		80		16	8	65	24
394734_3663_3135	104	TG	AC	69		102		34	17	69	2
424090_2175_3016	104	G	C	73		81		9	9	73	23
424090_2175_3016	104	G	C	83		95		13	13	83	9
471802_0862_3278	104	ACT	ACT	87		98		12	4	87	6
136575_1202_1236	105	TGT	AAC	43		59		17	5	43	46
155986_0933_0376	105	GA	AG	40		62		23	11	40	43
254981_3430_2721	105	ATG	ATC	41		61		21	7	41	44
279810_1177_0464	105	AT	AT	54		64		11	5	54	41
357461_2223_0699	105	TA	AT	33		51		19	9	33	54
049749_1739_2183	105	AT	AT	10		19		10	5	10	86
113276_1498_0701	105	TA	AT	93		105		13	6	93	0
116914_0860_0579	105	GGC	CCG	86		105		20	6	86	0
120172_3315_1875	105	TGT	AAC	93		105		13	4	93	0
120172_3315_1875	105	TGT	AAC	21		34		14	4	21	71
136575_1202_1236	105	GTT	AAC	87		105		19	6	87	0
136575_1202_1236	105	TGT	AAC	64		77		14	4	64	28
155986_0933_0376	105	GC	CG	14		38		25	12	14	67
179392_1786_2720	105	A	A	18		25		8	8	18	80
213203_0997_0313	105	CA	AC	93		105		13	6	93	0
219403_1202_1202	105	AG	AG	61		92		32	16	61	13
254981_3430_2721	105	ATG	ATC	23		39		17	5	23	66
276732_4022_1762	105	AG	AG	76		105		30	15	76	0
340687_3959_1709	105	AT	AT	29		39		11	5	29	66
357461_2223_0699	105	CA	AC	17		24		8	4	17	81
357461_2223_0699	105	TACA	ATAC	1		16		16	4	1	89
380509_1804_1093	105	TC	AG	25		32		8	4	25	73
388870_3287_0240	105	AT	AT	11		21		11	5	11	84
439187_2401_3908	105	TA	AT	67		99		33	16	67	6
002268_1734_0633	106	GA	AG	40		50		11	5	40	56
286253_0402_0286	106	A	A	45		52		8	8	45	54
091370_1180_2000	106	AG	AG	35		42		8	4	35	64
286253_0402_0286	106	A	A	34		42		9	9	34	64
385549_3586_0423	106	CTT	AAG	62		75		14	4	62	31
392260_1042_2237	106	TG	AC	47		69		23	11	47	37
004663_1087_2096	106	T	A	77		85		9	9	77	21
005440_0907_0427	106	GT	AC	61		81		21	10	61	25
005440_0907_0427	106	AG	AG	82		106		25	12	82	0
009360_1086_1711	106	G	C	89		100		12	12	89	6
091366_0096_1697	106	A	A	15		22		8	8	15	84
134564_0608_2239	106	TTC	AAG	25		36		12	4	25	70
286253_0402_0286	106	A	A	71		78		8	8	71	28
286253_0402_0286	106	A	A	19		26		8	8	19	80
311239_1006_0085	106	TG	AC	86		93		8	4	86	13
311239_1006_0085	106	TC	AG	55		83		29	14	55	23
319315_3444_3061	106	A	A	77		86		10	10	77	20
376049_2992_3766	106	T	A	73		83		11	11	73	23
385549_3586_0423	106	CTT	AAG	90		106		17	5	90	0
392260_1042_2237	106	TG	AC	12		19		8	4	12	87
463820_1095_0063	106	AG	AG	11		21		11	5	11	85
010346_0862_0921	107	AT	AT	41		51		11	5	41	56
020257_2782_3953	107	TC	AG	47		54		8	4	47	53
004037_1139_1969	107	AGGAGA	AAGGAG	33		52		20	3	33	55
165826_1131_3626	107	T	A	68		76		9	9	68	31
167840_2306_2081	107	AC	AC	38		50		13	6	38	57
239813_1779_3401	107	A	A	37		44		8	8	37	63
260912_2796_2999	107	AT	AT	34		50		17	8	34	57
400930_0383_3060	107	AT	AT	30		38		9	4	30	69
425035_3944_3210	107	CA	AC	58		71		14	7	58	36
004037_1139_1969	107	GAA	AAG	76		89		14	4	76	18
004037_1139_1969	107	GAG	AGG	2		16		15	5	2	91
025332_1266_1752	107	CA	AC	73		105		33	16	73	2
046828_3840_0321	107	CTG	AGC	62		81		20	6	62	26
167840_2306_2081	107	CA	AC	77		85		9	4	77	22
167840_2306_2081	107	TC	AG	14		21		8	4	14	86
167840_2306_2081	107	CT	AG	23		37		15	7	23	70
198960_3225_1142	107	T	A	82		89		8	8	82	18
268186_0944_2085	107	GT	AC	78		87		10	5	78	20
325153_3643_1873	107	CT	AG	95		107		13	6	95	0
325153_3643_1873	107	TC	AG	81		93		13	6	81	14
348951_3790_1244	107	GAG	AGG	21		40		20	6	21	67
352280_3937_2819	107	T	A	19		26		8	8	19	81
425035_3944_3210	107	AC	AC	73		97		25	12	73	10
425035_3944_3210	107	AC	AC	98		107		10	5	98	0
102799_3451_1886	108	GT	AC	51		60		10	5	51	48
120853_0186_2693	108	A	A	43		50		8	8	43	58
136394_3830_2470	108	GA	AG	57		64		8	4	57	44
413740_0038_1926	108	T	A	43		50		8	8	43	58
451843_1308_3581	108	AC	AC	48		55		8	4	48	53
102799_3451_1886	108	TG	AC	62		74		13	6	62	34
451843_1308_3581	108	C	C	34		46		13	13	34	62
464119_2650_3105	108	CAG	AGC	58		74		17	5	58	34
006091_0266_2994	108	GT	AC	78		87		10	5	78	21
040645_1753_2726	108	TCT	AAG	27		40		14	4	27	68
040645_1753_2726	108	CTT	AAG	7		19		13	4	7	89
046182_0500_3060	108	GA	AG	59		96		38	19	59	12
072664_1211_3019	108	TCT	AAG	1		49		49	16	1	59
091427_1114_0466	108	GA	AG	55		90		36	18	55	18
106589_1915_1382	108	AG	AG	96		103		8	4	96	5
120853_0186_2693	108	C	C	84		96		13	13	84	12
197468_1366_3994	108	AAC	AAC	17		30		14	4	17	78
198593_1463_0538	108	T	A	86		93		8	8	86	15
198593_1463_0538	108	T	A	98		107		10	10	98	1
357585_0185_1376	108	A	A	91		98		8	8	91	10
388924_1664_1220	108	GGC	CCG	82		93		12	4	82	15
389702_3247_4035	108	TA	AT	93		104		12	6	93	4
389702_3247_4035	108	AT	AT	57		91		35	17	57	17
411187_2734_3603	108	AG	AG	60		100		41	20	60	8
417997_3246_3915	108	GA	AG	77		103		27	13	77	5
420862_1358_0171	108	TTC	AAG	20		31		12	4	20	77
420862_1358_0171	108	TA	AT	85		92		8	4	85	16
451843_1308_3581	108	CA	AC	73		97		25	12	73	11
464119_2650_3105	108	ACA	AAC	75		108		34	11	75	0
483615_2512_3239	108	AT	AT	7		14		8	4	7	94
034590_2530_0350	109	A	A	44		53		10	10	44	56
034590_2530_0350	109	A	A	55		62		8	8	55	47
178056_0314_3207	109	A	A	52		59		8	8	52	50
278354_1240_3703	109	GA	AG	46		54		9	4	46	55
420718_3470_1542	109	T	A	43		50		8	8	43	59
006147_0314_1516	109	CA	AC	61		70		10	5	61	39
054340_0728_0698	109	CT	AG	68		75		8	4	68	34
307890_1540_3200	109	GAT	ATC	57		76		20	6	57	33
354712_1497_0654	109	TGC	AGC	32		45		14	4	32	64
005039_1252_1488	109	GA	AG	51		90		40	20	51	19
009730_1161_1821	109	AT	AT	17		28		12	6	17	81
018590_0976_1192	109	TA	AT	89		99		11	5	89	10
034590_2530_0350	109	A	A	76		85		10	10	76	24
034590_2530_0350	109	A	A	91		99		9	9	91	10
054340_0728_0698	109	GT	AC	100		109		10	5	100	0
054340_0728_0698	109	TC	AG	87		99		13	6	87	10
151648_0960_1205	109	A	A	100		108		9	9	100	1
160046_2579_3728	109	A	A	79		86		8	8	79	23
160046_2579_3728	109	AAGAAA	AAAAAG	64		83		20	3	64	26
168338_1365_2480	109	AC	AC	84		99		16	8	84	10
168338_1365_2480	109	AC	AC	67		82		16	8	67	27
288152_3977_1190	109	GCG	CCG	88		99		12	4	88	10
306799_2952_3256	109	A	A	74		82		9	9	74	27
309230_3149_3779	109	A	A	91		98		8	8	91	11
320682_1426_0307	109	TG	AC	6		15		10	5	6	94
320682_1426_0307	109	GT	AC	16		26		11	5	16	83
320682_1426_0307	109	AG	AG	27		36		10	5	27	73
392452_0663_1137	109	GA	AG	64		97		34	17	64	12
433678_2822_3992	109	GA	AG	54		91		38	19	54	18
031480_2786_1785	110	GT	AC	59		67		9	4	59	43
040380_1082_2211	110	CT	AG	50		63		14	7	50	47
115423_3842_1966	110	GA	AG	48		55		8	4	48	55
118285_0212_0228	110	CT	AG	54		61		8	4	54	49
131301_3444_1732	110	GA	AG	50		57		8	4	50	53
485351_0557_1526	110	T	A	52		59		8	8	52	51
040380_1082_2211	110	CT	AG	67		74		8	4	67	36
118285_0212_0228	110	CT	AG	30		44		15	7	30	66
151959_3483_1070	110	AGA	AAG	62		75		14	4	62	35
229375_1793_1210	110	TC	AG	50		76		27	13	50	34
485351_0557_1526	110	T	A	68		77		10	10	68	33
040380_1082_2211	110	CT	AG	83		96		14	7	83	14
115423_3842_1966	110	AG	AG	57		93		37	18	57	17
118285_0212_0228	110	CA	AC	88		98		11	5	88	12
124839_0597_2748	110	CA	AC	84		94		11	5	84	16
124839_0597_2748	110	AC	AC	59		82		24	12	59	28
131301_3444_1732	110	A	A	71		82		12	12	71	28
131301_3444_1732	110	AG	AG	85		93		9	4	85	17
151959_3483_1070	110	AGA	AAG	22		34		13	4	22	76
151959_3483_1070	110	AGA	AAG	8		19		12	4	8	91
183371_0355_3873	110	A	A	79		86		8	8	79	24
191093_3670_3162	110	AGA	AAG	95		108		14	4	95	2
191093_3670_3162	110	AGAAGG	AAGGAG	29		51		23	3	29	59
198224_3638_1944	110	AT	AT	26		34		9	4	26	76
222656_2118_1041	110	CCG	CCG	10		23		14	4	10	87
351675_1317_0111	110	TA	AT	1		17		17	8	1	93
351675_1317_0111	110	GTAT	ATAC	18		33		16	4	18	77
358798_0160_3424	110	GA	AG	91		104		14	7	91	6
358798_0160_3424	110	GA	AG	75		83		9	4	75	27
384443_0695_2082	110	GA	AG	66		108		43	21	66	2
398708_1446_3777	110	GA	AG	78		110		33	16	78	0
485351_0557_1526	110	T	A	88		96		9	9	88	14
062537_0145_0249	111	TTTCC	AAAGG	41		59		19	3	41	52
072574_1946_0692	111	CT	AG	60		69		10	5	60	42
102685_2357_0694	111	A	A	47		56		10	10	47	55
375752_2685_3720	111	AG	AG	50		58		9	4	50	53
072574_1946_0692	111	TC	AG	71		81		11	5	71	30
112776_2485_0863	111	G	C	64		81		18	18	64	30
311805_3744_3358	111	AG	AG	62		81		20	10	62	30
326603_1240_2836	111	TTC	AAG	37		56		20	6	37	55
349498_3605_2255	111	GAG	AGG	30		57		28	9	30	54
375752_2685_3720	111	GA	AG	64		79		16	8	64	32
402240_2848_3488	111	TA	AT	62		74		13	6	62	37
424058_1068_3533	111	GA	AG	60		72		13	6	60	39
028725_1150_1257	111	TCA	ATC	59		101		43	14	59	10
036385_3058_0275	111	TA	AT	9		21		13	6	9	90
046998_2738_1158	111	CTT	AAG	27		49		23	7	27	62
046998_2738_1158	111	CTT	AAG	69		97		29	9	69	14
062537_0145_0249	111	TTTCC	AAAGG	15		38		24	4	15	73
072574_1946_0692	111	GT	AC	86		96		11	5	86	15
119297_1446_3658	111	TTTG	AAAC	87		98		12	3	87	13
165855_1380_2352	111	TA	AT	18		25		8	4	18	86
165855_1380_2352	111	TA	AT	1		8		8	4	1	103
298525_1201_0487	111	TG	AC	74		87		14	7	74	24
298525_1201_0487	111	AG	AG	88		101		14	7	88	10
298525_1201_0487	111	GA	AG	102		111		10	5	102	0
311805_3744_3358	111	AG	AG	83		98		16	8	83	13
322214_0186_3017	111	GT	AC	19		27		9	4	19	84
333837_3360_0347	111	TG	AC	59		111		53	26	59	0
334258_3273_3805	111	AT	AT	27		37		11	5	27	74
365664_3930_3795	111	TC	AG	16		23		8	4	16	88
375752_2685_3720	111	AG	AG	26		36		11	5	26	75
388465_4015_3583	111	TGCA	ATGC	99		110		12	3	99	1
414225_0885_2282	111	AT	AT	69		106		38	19	69	5
444484_0423_2176	111	TG	AC	83		111		29	14	83	0
446060_1040_1305	111	TTTAAT	AAAATT	72		92		21	3	72	19
013897_1348_2165	112	GT	AC	48		58		11	5	48	54
015030_3919_3648	112	GAG	AGG	46		63		18	6	46	49
136311_3205_1955	112	AC	AC	45		65		21	10	45	47
343534_1235_1870	112	TC	AG	49		68		20	10	49	44
409667_3284_3005	112	A	A	60		68		9	9	60	44
409667_3284_3005	112	A	A	42		49		8	8	42	63
060267_1978_0845	112	AAGAG	AAGAG	61		76		16	3	61	36
136311_3205_1955	112	TA	AT	66		81		16	8	66	31
228143_2477_3701	112	TA	AT	68		78		11	5	68	34
416202_0316_2912	112	A	A	32		40		9	9	32	72
013897_1348_2165	112	GA	AG	61		98		38	19	61	14
015030_3919_3648	112	GAA	AAG	29		40		12	4	29	72
032168_3182_0322	112	TTC	AAG	18		61		44	14	18	51
085249_2960_0071	112	AT	AT	24		31		8	4	24	81
194349_1606_1605	112	GA	AG	62		112		51	25	62	0
297010_1080_3551	112	CT	AG	71		102		32	16	71	10
313703_2808_0158	112	TC	AG	86		93		8	4	86	19
313703_2808_0158	112	CT	AG	94		108		15	7	94	4
385948_3576_3322	112	T	A	9		16		8	8	9	96
409667_3284_3005	112	A	A	90		97		8	8	90	15
409667_3284_3005	112	A	A	5		12		8	8	5	100
409667_3284_3005	112	A	A	20		27		8	8	20	85
470715_2244_3071	112	TG	AC	85		92		8	4	85	20
086665_2019_2743	113	GA	AG	44		52		9	4	44	61
253464_1191_2500	113	CT	AG	46		54		9	4	46	59
288901_2758_3599	113	AT	AT	44		54		11	5	44	59
129311_2732_3154	113	TA	AT	68		78		11	5	68	35
313275_1620_2405	113	CA	AC	68		82		15	7	68	31
375817_0230_0509	113	GT	AC	39		49		11	5	39	64
022065_0827_3272	113	AC	AC	21		29		9	4	21	84
022065_0827_3272	113	AC	AC	64		98		35	17	64	15
206357_0736_3292	113	CA	AC	6		13		8	4	6	100
208791_1032_2620	113	CT	AG	19		26		8	4	19	87
215239_1540_2813	113	GT	AC	1		12		12	6	1	101
215239_1540_2813	113	GT	AC	79		111		33	16	79	2
219068_0904_3770	113	TA	AT	84		94		11	5	84	19
247338_2524_2904	113	CT	AG	70		99		30	15	70	14
288901_2758_3599	113	GT	AC	85		92		8	4	85	21
313275_1620_2405	113	AG	AG	85		103		19	9	85	10
326457_0633_1271	113	GT	AC	14		21		8	4	14	92
375817_0230_0509	113	G	C	68		84		17	17	68	29
385268_2983_3050	113	A	A	6		13		8	8	6	100
385268_2983_3050	113	A	A	78		86		9	9	78	27
410916_2607_1487	113	C	C	102		113		12	12	102	0
452484_2274_0766	113	AT	AT	15		31		17	8	15	82
009818_0195_2642	114	GA	AG	60		67		8	4	60	47
306161_0964_4037	114	AG	AG	45		66		22	11	45	48
444976_0995_0302	114	CAT	ATC	57		74		18	6	57	40
199754_3248_1406	114	TG	AC	39		53		15	7	39	61
306161_0964_4037	114	TG	AC	37		44		8	4	37	70
397793_1673_1124	114	T	A	31		39		9	9	31	75
444976_0995_0302	114	CAT	ATC	33		46		14	4	33	68
021664_1443_1170	114	TA	AT	65		108		44	22	65	6
021664_1443_1170	114	C	C	12		19		8	8	12	95
040151_3157_3659	114	T	A	102		109		8	8	102	5
041948_0947_2529	114	TGT	AAC	42		88		47	15	42	26
074248_0706_1816	114	TTG	AAC	85		102		18	6	85	12
074248_0706_1816	114	GTT	AAC	2		20		19	6	2	94
074248_0706_1816	114	CTG	AGC	21		32		12	4	21	82
086087_3556_1658	114	TA	AT	81		104		24	12	81	10
116063_3269_1632	114	AT	AT	90		107		18	9	90	7
154295_3257_2928	114	TA	AT	98		112		15	7	98	2
197232_0552_1081	114	AC	AC	4		11		8	4	4	103
199754_3248_1406	114	TG	AC	3		15		13	6	3	99
199754_3248_1406	114	TGCG	ACGC	21		38		18	4	21	76
216279_2774_2463	114	CAG	AGC	82		93		12	4	82	21
306161_0964_4037	114	TC	AG	98		105		8	4	98	9
320357_2192_0159	114	C	C	83		96		14	14	83	18
367209_2657_2107	114	GA	AG	56		95		40	20	56	19
367663_2998_2391	114	GA	AG	76		97		22	11	76	17
388423_3135_0822	114	TC	AG	86		95		10	5	86	19
388423_3135_0822	114	CTCTC	AGAGG	91		110		20	4	91	4
015480_1661_1907	115	AT	AT	41		51		11	5	41	64
025571_1324_3282	115	AT	AT	54		62		9	4	54	53
060174_1254_2474	115	T	A	43		50		8	8	43	65
161961_0750_3551	115	TA	AT	49		56		8	4	49	59
198515_1911_0728	115	TC	AG	57		65		9	4	57	50
463746_3892_2820	115	T	A	58		67		10	10	58	48
491214_2116_1046	115	AG	AG	66		74		9	4	66	41
491214_2116_1046	115	AG	AG	54		64		11	5	54	51
227062_2856_1209	115	AC	AC	52		85		34	17	52	30
251604_1623_2837	115	GT	AC	60		77		18	9	60	38
252465_1709_3649	115	TA	AT	77		85		9	4	77	30
491214_2116_1046	115	AG	AG	76		83		8	4	76	32
011907_1001_0308	115	GT	AC	26		34		9	4	26	81
023165_1136_3459	115	TA	AT	95		108		14	7	95	7
025763_1112_0527	115	GA	AG	66		101		36	18	66	14
044348_3023_0488	115	T	A	4		12		9	9	4	103
074981_4015_3842	115	AT	AT	3		10		8	4	3	105
117238_4026_1135	115	TG	AC	58		113		56	28	58	2
126338_0436_3148	115	TG	AC	19		27		9	4	19	88
126338_0436_3148	115	AT	AT	28		51		24	12	28	64
126338_0436_3148	115	TATG	ATAC	9		21		13	3	9	94
165053_2544_3416	115	TA	AT	76		92		17	8	76	23
198515_1911_0728	115	TG	AC	81		92		12	6	81	23
200994_1835_2143	115	CAA	AAC	1		26		26	8	1	89
200994_1835_2143	115	CAACAG	AACAGC	79		101		23	3	79	14
251604_1623_2837	115	TG	AC	93		113		21	10	93	2
319304_3204_3370	115	AT	AT	2		12		11	5	2	103
331396_3988_1168	115	T	A	102		109		8	8	102	6
331396_3988_1168	115	T	A	91		100		10	10	91	15
392179_3631_3456	115	TA	AT	100		110		11	5	100	5
393175_2917_3984	115	GA	AG	66		115		50	25	66	0
463746_3892_2820	115	T	A	26		34		9	9	26	81
463746_3892_2820	115	A	A	104		112		9	9	104	3
463746_3892_2820	115	T	A	17		24		8	8	17	91
019004_1635_2891	116	A	A	41		48		8	8	41	68
114967_0668_1783	116	GA	AG	46		53		8	4	46	63
176192_3758_0166	116	AC	AC	44		57		14	7	44	59
176192_3758_0166	116	CCACAC	ACACCC	58		75		18	3	58	41
272033_2433_1388	116	A	A	41		49		9	9	41	67
369132_4024_3877	116	GT	AC	44		59		16	8	44	57
401560_3187_0762	116	CA	AC	61		69		9	4	61	47
409142_0098_2690	116	AC	AC	42		66		25	12	42	50
176192_3758_0166	116	CA	AC	71		80		10	5	71	36
188279_2296_2850	116	GAT	ATC	58		77		20	6	58	39
303080_3330_1070	116	TA	AT	37		45		9	4	37	71
351288_3775_3534	116	CT	AG	31		38		8	4	31	78
000988_1547_2858	116	AG	AG	23		33		11	5	23	83
003982_1334_3237	116	AT	AT	69		111		43	21	69	5
082267_0740_2736	116	AG	AG	53		91		39	19	53	25
151179_2212_1452	116	TA	AT	77		87		11	5	77	29
176192_3758_0166	116	AC	AC	85		98		14	7	85	18
225137_1356_2641	116	TA	AT	83		94		12	6	83	22
256120_3710_2029	116	AT	AT	3		13		11	5	3	103
369132_4024_3877	116	TG	AC	79		94		16	8	79	22
409142_0098_2690	116	AC	AC	84		95		12	6	84	21
415985_1993_3737	116	TA	AT	66		111		46	23	66	5
433657_2359_1261	116	CAT	ATC	6		19		14	4	6	97
440877_0814_3405	116	TA	AT	95		108		14	7	95	8
440877_0814_3405	116	TA	AT	74		92		19	9	74	24
492391_1462_1770	116	AC	AC	63		87		25	12	63	29
492391_1462_1770	116	AC	AC	97		108		12	6	97	8
002857_1404_1784	117	CAA	AAC	49		65		17	5	49	52
030137_3046_2690	117	GAA	AAG	62		75		14	4	62	42
039553_0834_1573	117	TGT	AAC	43		65		23	7	43	52
056184_1853_0188	117	GGATT	AATCC	61		75		15	3	61	42
096667_0421_2089	117	ACC	ACC	41		53		13	4	41	64
170230_2275_1145	117	GAA	AAG	59		70		12	4	59	47
375686_3152_0583	117	TTC	AAG	49		60		12	4	49	57
170230_2275_1145	117	CTC	AGG	34		46		13	4	34	71
401302_2952_1344	117	C	C	35		48		14	14	35	69
450249_0116_3374	117	AC	AC	49		78		30	15	49	39
450249_0116_3374	117	TC	AG	37		45		9	4	37	72
002857_1404_1784	117	AAC	AAC	76		109		34	11	76	8
006456_1941_2673	117	T	A	4		11		8	8	4	106
022456_1696_2192	117	TA	AT	103		113		11	5	103	4
030137_3046_2690	117	AGA	AAG	88		105		18	6	88	12
039553_0834_1573	117	TTG	AAC	1		35		35	11	1	82
056184_1853_0188	117	TC	AG	96		111		16	8	96	6
082163_3426_0846	117	C	C	13		24		12	12	13	93
170230_2275_1145	117	GAG	AGG	77		94		18	6	77	23
199250_0743_3365	117	ATT	AAT	104		115		12	4	104	2
375686_3152_0583	117	CTC	AGG	25		42		18	6	25	75
380085_1922_0070	117	CA	AC	104		117		14	7	104	0
380085_1922_0070	117	TC	AG	28		35		8	4	28	82
380085_1922_0070	117	CT	AG	80		100		21	10	80	17
426629_0562_0635	117	TA	AT	79		97		19	9	79	20
016590_3138_1772	118	T	A	41		48		8	8	41	70
016590_3138_1772	118	TTTTTC	AAAAAG	44		66		23	3	44	52
011836_0190_2303	118	AT	AT	77		84		8	4	77	34
184178_0774_0753	118	GTT	AAC	64		116		53	17	64	2
321263_0060_2733	118	AG	AG	70		112		43	21	70	6
362332_1698_0859	118	A	A	29		36		8	8	29	82
365218_0218_3713	118	GA	AG	66		105		40	20	66	13
380641_2193_3748	118	AGA	AAG	81		102		22	7	81	16
389482_3410_1941	118	ATGT	ATAC	26		38		13	3	26	80
399674_1370_1598	118	CG	CG	2		9		8	4	2	109
435153_3132_2631	118	TTGT	AAAC	26		38		13	3	26	80
439557_2814_2337	118	AT	AT	17		29		13	6	17	89
026162_1199_1870	119	CT	AG	61		68		8	4	61	51
041165_2609_2447	119	TG	AC	69		76		8	4	69	43
045739_3321_1742	119	TA	AT	51		59		9	4	51	60
212683_3779_1322	119	AT	AT	70		77		8	4	70	42
409139_2877_3217	119	TA	AT	42		79		38	19	42	40
022279_0850_2311	119	AC	AC	21		29		9	4	21	90
022279_0850_2311	119	AC	AC	64		98		35	17	64	21
040743_3592_2083	119	T	A	89		96		8	8	89	23
041165_2609_2447	119	AG	AG	77		90		14	7	77	29
041165_2609_2447	119	GA	AG	99		117		19	9	99	2
072573_1477_2236	119	AC	AC	26		33		8	4	26	86
078503_3966_3870	119	GA	AG	75		105		31	15	75	14
078503_3966_3870	119	GA	AG	111		119		9	4	111	0
153791_1390_0689	119	AG	AG	80		112		33	16	80	7
239484_2657_2946	119	TG	AC	105		112		8	4	105	7
246245_3275_2417	119	AGA	AAG	103		117		15	5	103	2
246245_3275_2417	119	AG	AG	68		102		35	17	68	17
345721_0802_2073	119	TC	AG	85		99		15	7	85	20
345721_0802_2073	119	TC	AG	101		117		17	8	101	2
375066_3856_1475	119	AG	AG	83		116		34	17	83	3
422588_2610_1516	119	AGA	AAG	86		98		13	4	86	21
435885_0815_0990	119	TAA	AAT	28		41		14	4	28	78
439293_1223_3193	119	TCA	ATC	91		102		12	4	91	17
450872_1810_1554	119	TC	AG	104		111		8	4	104	8
012051_1155_1910	120	CT	AG	58		66		9	4	58	54
097274_2456_2797	120	GA	AG	53		60		8	4	53	60
114273_1301_2416	120	TGC	AGC	66		77		12	4	66	43
312129_2780_0821	120	GA	AG	44		52		9	4	44	68
017694_3156_1828	120	TA	AT	74		84		11	5	74	36
097274_2456_2797	120	GA	AG	66		86		21	10	66	34
193821_0046_3844	120	GA	AG	75		82		8	4	75	38
290977_1102_3984	120	GCG	CCG	39		50		12	4	39	70
321370_3422_0259	120	GT	AC	36		45		10	5	36	75
012051_1155_1910	120	AC	AC	69		102		34	17	69	18
020028_2435_0917	120	A	A	28		35		8	8	28	85
025884_1648_0405	120	AG	AG	97		105		9	4	97	15
047782_2841_1918	120	AT	AT	81		120		40	20	81	0
060187_1826_0967	120	AG	AG	83		120		38	19	83	0
107245_2918_1464	120	TA	AT	91		104		14	7	91	16
114273_1301_2416	120	TGC	AGC	18		31		14	4	18	89
114273_1301_2416	120	GGCTGC	AGCCGC	90		109		20	3	90	11
157275_3469_3510	120	AT	AT	110		118		9	4	110	2
176116_2013_0814	120	CATC	ATCC	102		113		12	3	102	7
195973_0377_3107	120	CTT	AAG	6		19		14	4	6	101
195973_0377_3107	120	CCT	AGG	93		110		18	6	93	10
220143_2785_0838	120	TCGT	AACG	97		110		14	3	97	10
220143_2785_0838	120	CA	AC	16		23		8	4	16	97
220143_2785_0838	120	TC	AG	68		96		29	14	68	24
231992_3751_1417	120	CT	AG	104		114		11	5	104	6
346673_2700_2524	120	GA	AG	17		24		8	4	17	96
383743_2552_2360	120	TA	AT	69		120		52	26	69	0
412646_2007_2502	120	AT	AT	8		16		9	4	8	104
440070_0628_4039	120	GT	AC	7		14		8	4	7	106
022638_1639_1451	121	AG	AG	40		47		8	4	40	74
022638_1639_1451	121	GA	AG	57		68		12	6	57	53
022638_1639_1451	121	AG	AG	70		77		8	4	70	44
107345_2998_1637	121	CA	AC	70		81		12	6	70	40
130327_0167_3520	121	AAC	AAC	49		66		18	6	49	55
229852_3824_0349	121	AC	AC	68		75		8	4	68	46
415149_3237_3740	121	GT	AC	54		65		12	6	54	56
025147_1130_2794	121	GAT	ATC	71		90		20	6	71	31
107345_2998_1637	121	AC	AC	83		90		8	4	83	31
336184_3988_0949	121	GT	AC	68		84		17	8	68	37
393193_0766_3702	121	T	A	79		86		8	8	79	35
406756_2803_2173	121	T	A	82		89		8	8	82	32
479608_0828_3288	121	TC	AG	31		38		8	4	31	83
005713_1357_1408	121	AT	AT	16		26		11	5	16	95
022638_1639_1451	121	TG	AC	26		39		14	7	26	82
022638_1639_1451	121	TC	AG	99		106		8	4	99	15
023278_0761_1580	121	CAA	AAC	110		121		12	4	110	0
031653_2715_2878	121	TAT	AAT	13		25		13	4	13	96
031653_2715_2878	121	TA	AT	5		15		11	5	5	106
107345_2998_1637	121	GA	AG	101		121		21	10	101	0
122621_0956_0972	121	A	A	94		101		8	8	94	20
130327_0167_3520	121	AGCAAC	AACAGC	7		31		25	4	7	90
155432_2761_1931	121	AT	AT	27		35		9	4	27	86
162702_0509_3833	121	ACA	AAC	96		107		12	4	96	14
162702_0509_3833	121	CAA	AAC	4		18		15	5	4	103
205332_1080_0984	121	AG	AG	69		109		41	20	69	12
336184_3988_0949	121	AG	AG	85		107		23	11	85	14
336344_0684_0171	121	C	C	102		112		11	11	102	9
391393_0282_1969	121	TCA	ATC	52		98		47	15	52	23
415149_3237_3740	121	TG	AC	67		106		40	20	67	15
444603_3823_0552	121	T	A	108		116		9	9	108	5
042369_0443_4044	122	GT	AC	68		76		9	4	68	46
083354_0857_2470	122	AAC	AAC	48		61		14	4	48	61
152384_1326_3512	122	A	A	52		61		10	10	52	61
152384_1326_3512	122	A	A	64		71		8	8	64	51
263732_0831_1574	122	CA	AC	71		78		8	4	71	44
441030_0998_3105	122	A	A	59		66		8	8	59	56
043458_3147_0180	122	CAA	AAC	39		67		29	9	39	55
070339_0347_0312	122	C	C	80		87		8	8	80	35
245644_2123_1984	122	GA	AG	37		52		16	8	37	70
306738_3493_1428	122	AT	AT	39		49		11	5	39	73
005073_1436_1962	122	A	A	2		9		8	8	2	113
005073_1436_1962	122	A	A	11		19		9	9	11	103
005073_1436_1962	122	AAAAGA	AAAAAG	84		104		21	3	84	18
011292_1916_0312	122	CAA	AAC	93		121		29	9	93	1
011292_1916_0312	122	CAA	AAC	21		34		14	4	21	88
038682_1556_3539	122	AG	AG	80		117		38	19	80	5
042369_0443_4044	122	AT	AT	26		36		11	5	26	86
043458_3147_0180	122	AAC	AAC	1		30		30	10	1	92
070339_0347_0312	122	GA	AG	16		23		8	4	16	99
076807_3318_1330	122	CAAG	AAGC	16		27		12	3	16	95
083354_0857_2470	122	ACA	AAC	1		46		46	15	1	76
130658_0612_1230	122	AT	AT	112		122		11	5	112	0
152384_1326_3512	122	A	A	85		93		9	9	85	29
152384_1326_3512	122	A	A	99		107		9	9	99	15
164936_2124_3293	122	TTAC	AAGT	106		120		15	3	106	2
263732_0831_1574	122	T	A	22		29		8	8	22	93
263732_0831_1574	122	AC	AC	80		107		28	14	80	15
263732_0831_1574	122	TC	AG	1		12		12	6	1	110
322750_1344_2102	122	TA	AT	73		109		37	18	73	13
377803_1115_3797	122	C	C	22		31		10	10	22	91
385808_0185_1621	122	TTC	AAG	24		35		12	4	24	87
385808_0185_1621	122	TC	AG	11		18		8	4	11	104
388850_0725_3869	122	AT	AT	5		19		15	7	5	103
441030_0998_3105	122	A	A	19		27		9	9	19	95
027570_1141_1243	123	GAT	ATC	58		77		20	6	58	46
070211_0694_1049	123	GT	AC	67		82		16	8	67	41
217812_1136_2746	123	AGA	AAG	48		61		14	4	48	62
222240_3229_1941	123	AG	AG	48		62		15	7	48	61
242208_4004_3940	123	GGA	AGG	70		81		12	4	70	42
391371_2266_1206	123	A	A	64		72		9	9	64	51
011774_0238_0848	123	TCT	AAG	78		91		14	4	78	32
085536_2325_0472	123	GA	AG	72		84		13	6	72	39
341533_2400_3144	123	TG	AC	37		71		35	17	37	52
341533_2400_3144	123	G	C	81		91		11	11	81	32
003538_2720_0205	123	TTG	AAC	73		109		37	12	73	14
007765_0951_0293	123	ATGT	ATAC	19		31		13	3	19	92
053019_1876_0404	123	GGGTGG	ACCCCC	2		23		22	3	2	100
070211_0694_1049	123	TG	AC	98		123		26	13	98	0
217812_1136_2746	123	GAA	AAG	98		110		13	4	98	13
217812_1136_2746	123	GAA	AAG	10		23		14	4	10	100
251774_0376_0809	123	TTG	AAC	2		14		13	4	2	109
255581_2897_1923	123	A	A	24		31		8	8	24	92
267811_0879_1450	123	TG	AC	65		101		37	18	65	22
332995_3426_0121	123	GA	AG	13		20		8	4	13	103
348060_0625_3140	123	C	C	27		37		11	11	27	86
447070_2974_3523	123	GA	AG	18		25		8	4	18	98
460526_1459_3299	123	AT	AT	66		98		33	16	66	25
460526_1459_3299	123	AT	AT	100		123		24	12	100	0
150496_3269_1790	124	AC	AC	40		54		15	7	40	70
202708_3262_3569	124	TCT	AAG	71		82		12	4	71	42
043615_1868_3575	124	AT	AT	79		88		10	5	79	36
090397_1430_3746	124	AT	AT	84		92		9	4	84	32
214551_0377_3435	124	TA	AT	77		93		17	8	77	31
215731_2487_0844	124	CTC	AGG	75		86		12	4	75	38
308647_2797_1300	124	TCT	AAG	30		89		60	20	30	35
038845_2948_1848	124	TCT	AAG	56		112		57	19	56	12
160713_1598_1042	124	GT	AC	68		124		57	28	68	0
166245_3119_3909	124	TA	AT	89		99		11	5	89	25
215731_2487_0844	124	CT	AG	90		98		9	4	90	26
253561_0899_3942	124	T	A	106		115		10	10	106	9
330093_3524_0731	124	TG	AC	70		103		34	17	70	21
330093_3524_0731	124	G	C	114		121		8	8	114	3
013298_3200_3719	125	A	A	68		83		16	16	68	42
045746_2514_3739	125	T	A	45		53		9	9	45	72
083415_1768_3897	125	TA	AT	68		82		15	7	68	43
216060_2859_2998	125	A	A	62		70		9	9	62	55
266738_1491_4045	125	TA	AT	72		82		11	5	72	43
313753_3395_3933	125	CA	AC	75		82		8	4	75	43
394051_3781_1206	125	TCT	AAG	47		59		13	4	47	66
484886_1063_0221	125	AT	AT	40		47		8	4	40	78
024718_0101_2282	125	GA	AG	84		92		9	4	84	33
057459_2764_3121	125	A	A	37		44		8	8	37	81
226408_0592_2696	125	GA	AG	74		91		18	9	74	34
289481_2587_2968	125	AC	AC	86		93		8	4	86	32
377496_2267_3927	125	A	A	80		88		9	9	80	37
393739_3445_0663	125	TG	AC	74		88		15	7	74	37
397701_0350_2776	125	GA	AG	33		56		24	12	33	69
045746_2514_3739	125	T	A	28		35		8	8	28	90
057459_2764_3121	125	A	A	102		109		8	8	102	16
076413_3249_1495	125	TTC	AAG	1		38		38	12	1	87
083415_1768_3897	125	TA	AT	84		106		23	11	84	19
111199_3985_1340	125	AG	AG	79		118		40	20	79	7
173524_0428_1436	125	AT	AT	13		23		11	5	13	102
189971_1996_0193	125	GA	AG	75		106		32	16	75	19
226408_0592_2696	125	GA	AG	118		125		8	4	118	0
226408_0592_2696	125	AG	AG	92		117		26	13	92	8
252444_3107_2128	125	AG	AG	64		125		62	31	64	0
256707_1018_3878	125	C	C	3		15		13	13	3	110
267446_1061_3269	125	GA	AG	73		114		42	21	73	11
328402_0943_0099	125	TA	AT	97		107		11	5	97	18
393739_3445_0663	125	TG	AC	90		106		17	8	90	19
409588_1068_0048	125	A	A	99		106		8	8	99	19
410697_0266_1107	125	AT	AT	57		117		61	30	57	8
426258_2746_0903	125	TA	AT	64		125		62	31	64	0
460573_1145_0928	125	TC	AG	93		100		8	4	93	25
153752_1806_1372	126	TA	AT	78		86		9	4	78	40
191650_2551_1277	126	GT	AC	68		75		8	4	68	51
497326_1059_0172	126	TC	AG	52		63		12	6	52	63
390682_2566_0778	126	TA	AT	77		87		11	5	77	39
010881_1439_1768	126	TA	AT	99		106		8	4	99	20
012572_1826_1734	126	AT	AT	81		121		41	20	81	5
014888_0876_0717	126	TA	AT	82		122		41	20	82	4
063251_0856_3981	126	AT	AT	29		36		8	4	29	90
116612_3675_1666	126	AC	AC	77		109		33	16	77	17
116612_3675_1666	126	AC	AC	110		126		17	8	110	0
317596_0340_3525	126	AC	AC	26		34		9	4	26	92
331525_2450_0619	126	AT	AT	10		20		11	5	10	106
337236_0045_2273	126	AC	AC	18		25		8	4	18	101
359849_0593_3086	126	TC	AG	14		22		9	4	14	104
414038_2116_0685	126	TA	AT	113		121		9	4	113	5
065465_2687_2137	127	CT	AG	53		65		13	6	53	62
075761_2769_2801	127	AG	AG	40		51		12	6	40	76
075761_2769_2801	127	AG	AG	62		70		9	4	62	57
075761_2769_2801	127	AG	AG	72		83		12	6	72	44
128168_0447_0123	127	TC	AG	72		79		8	4	72	48
157569_1296_2468	127	A	A	46		54		9	9	46	73
179539_0856_0486	127	AT	AT	49		56		8	4	49	71
253236_1880_0900	127	TA	AT	68		78		11	5	68	49
024193_2897_3934	127	AG	AG	32		40		9	4	32	87
236109_1603_2071	127	CAA	AAC	58		89		32	10	58	38
453505_1897_0471	127	TC	AG	84		95		12	6	84	32
000788_2478_0303	127	AT	AT	118		126		9	4	118	1
018180_1716_1235	127	CCT	AGG	106		117		12	4	106	10
021103_0926_2369	127	AC	AC	21		29		9	4	21	98
021103_0926_2369	127	AC	AC	64		98		35	17	64	29
022292_1093_0750	127	T	A	115		123		9	9	115	4
024193_2897_3934	127	C	C	103		111		9	9	103	16
028109_3529_0437	127	GT	AC	89		109		21	10	89	18
028109_3529_0437	127	AG	AG	110		127		18	9	110	0
116987_0815_1774	127	G	C	117		127		11	11	117	0
143922_1757_3061	127	TA	AT	111		121		11	5	111	6
159602_3653_1274	127	AT	AT	83		127		45	22	83	0
236109_1603_2071	127	AAC	AAC	2		15		14	4	2	112
237919_0209_1750	127	TGCA	ATGC	98		109		12	3	98	18
439350_0922_3739	127	GA	AG	73		114		42	21	73	13
453505_1897_0471	127	CT	AG	97		118		22	11	97	9
117552_3869_2375	128	TC	AG	48		66		19	9	48	62
117552_3869_2375	128	TC	AG	68		75		8	4	68	53
343169_0572_3679	128	A	A	61		68		8	8	61	60
223152_2259_3048	128	GA	AG	86		98		13	6	86	30
402145_2309_0805	128	CTCGG	AGCCG	77		91		15	3	77	37
106552_3729_2716	128	AT	AT	13		25		13	6	13	103
114354_1232_3221	128	T	A	101		109		9	9	101	19
175143_0436_0306	128	GT	AC	66		118		53	26	66	10
185712_0901_0177	128	GT	AC	1		20		20	10	1	108
185712_0901_0177	128	GA	AG	92		119		28	14	92	9
223152_2259_3048	128	GA	AG	100		128		29	14	100	0
258206_0255_2079	128	AC	AC	27		34		8	4	27	94
379492_2602_0624	128	AG	AG	5		15		11	5	5	113
379492_2602_0624	128	GAT	ATC	86		105		20	6	86	23
423040_0698_3701	128	C	C	104		115		12	12	104	13
516460_3197_0148	128	T	A	113		120		8	8	113	8
222911_2227_3525	129	T	A	57		65		9	9	57	64
226236_2607_1081	129	A	A	50		58		9	9	50	71
226236_2607_1081	129	A	A	66		74		9	9	66	55
222911_2227_3525	129	T	A	89		96		8	8	89	33
222911_2227_3525	129	T	A	39		48		10	10	39	81
030545_2345_1218	129	GA	AG	78		108		31	15	78	21
030545_2345_1218	129	GA	AG	110		127		18	9	110	2
077712_2849_2826	129	TA	AT	96		104		9	4	96	25
100026_1163_3495	129	CAA	AAC	88		129		42	14	88	0
144629_2939_1427	129	AGA	AAG	110		129		20	6	110	0
206912_0427_0780	129	GT	AC	19		28		10	5	19	101
222911_2227_3525	129	T	A	116		123		8	8	116	6
222911_2227_3525	129	T	A	24		31		8	8	24	98
244464_3284_2391	129	CA	AC	111		121		11	5	111	8
336008_3269_1930	129	GA	AG	82		123		42	21	82	6
375669_2676_3080	129	TACA	ATAC	4		17		14	3	4	112
433196_2868_3541	129	TA	AT	109		119		11	5	109	10
082179_0877_3257	130	TA	AT	79		89		11	5	79	41
179815_3158_0796	130	A	A	44		51		8	8	44	79
302859_0938_0222	130	TC	AG	78		88		11	5	78	42
302859_0938_0222	130	CT	AG	59		66		8	4	59	64
302859_0938_0222	130	TC	AG	68		76		9	4	68	54
328610_0536_3620	130	A	A	81		88		8	8	81	42
347811_1362_0680	130	GA	AG	60		72		13	6	60	58
028478_1466_1514	130	TCA	ATC	89		100		12	4	89	30
125242_2705_0955	130	AGAAGG	AAGGAG	73		92		20	3	73	38
125242_2705_0955	130	AGAAGG	AAGGAG	37		59		23	3	37	71
253086_1559_1359	130	TG	AC	79		96		18	9	79	34
363361_1870_0439	130	AG	AG	38		45		8	4	38	85
009779_1133_2125	130	TA	AT	105		113		9	4	105	17
073693_2671_0246	130	TCC	AGG	20		31		12	4	20	99
073693_2671_0246	130	TCC	AGG	110		122		13	4	110	8
079383_1876_2072	130	AT	AT	100		110		11	5	100	20
125242_2705_0955	130	GAGAAG	AAGGAG	93		113		21	3	93	17
166036_2747_3117	130	T	A	113		127		15	15	113	3
166036_2747_3117	130	GGACC	ACCGG	9		30		22	4	9	100
253086_1559_1359	130	AG	AG	97		112		16	8	97	18
253086_1559_1359	130	GA	AG	116		124		9	4	116	6
296655_3331_1474	130	AT	AT	3		10		8	4	3	120
363361_1870_0439	130	AG	AG	5		21		17	8	5	109
363361_1870_0439	130	AG	AG	23		37		15	7	23	93
446820_1956_2005	130	C	C	117		129		13	13	117	1
045816_0254_2746	131	T	A	46		54		9	9	46	77
249249_3526_3357	131	A	A	64		71		8	8	64	60
264408_3658_3153	131	AG	AG	66		73		8	4	66	58
034288_3719_0823	131	AAC	AAC	85		101		17	5	85	30
439598_2866_0205	131	AT	AT	90		97		8	4	90	34
081022_0734_2916	131	CA	AC	11		18		8	4	11	113
081022_0734_2916	131	AC	AC	3		10		8	4	3	121
100888_2481_1830	131	AG	AG	94		131		38	19	94	0
116549_1518_1756	131	GTT	AAC	83		108		26	8	83	23
117510_3833_2637	131	GTAGG	ACCCT	104		118		15	3	104	13
117510_3833_2637	131	AG	AG	54		103		50	25	54	28
288780_1896_3525	131	AT	AT	13		26		14	7	13	105
298382_2206_2630	131	AT	AT	83		131		49	24	83	0
315326_1942_1818	131	AT	AT	21		29		9	4	21	102
348745_1616_3731	131	A	A	5		12		8	8	5	119
358863_1196_4010	131	AT	AT	1		9		9	4	1	122
410911_1649_3980	131	AG	AG	73		115		43	21	73	16
000084_1405_1476	132	GA	AG	60		68		9	4	60	64
092597_1036_1239	132	TTG	AAC	58		85		28	9	58	47
104451_0692_2778	132	TA	AT	85		92		8	4	85	40
122333_1942_1317	132	TC	AG	68		75		8	4	68	57
247343_2965_0186	132	GA	AG	50		57		8	4	50	75
247343_2965_0186	132	CT	AG	81		88		8	4	81	44
183703_2259_0789	132	GTT	AAC	81		96		16	5	81	36
247343_2965_0186	132	TC	AG	90		101		12	6	90	31
313583_0601_3761	132	GT	AC	78		101		24	12	78	31
368703_1640_3346	132	GAA	AAG	89		102		14	4	89	30
414939_0560_2747	132	AT	AT	83		96		14	7	83	36
019339_0958_2228	132	TA	AT	90		132		43	21	90	0
024725_1695_2485	132	TA	AT	80		132		53	26	80	0
122333_1942_1317	132	TC	AG	118		132		15	7	118	0
128196_0518_3630	132	AC	AC	3		10		8	4	3	122
128196_0518_3630	132	CA	AC	11		18		8	4	11	114
152445_2910_3361	132	CA	AC	12		19		8	4	12	113
157143_0187_0891	132	C	C	114		125		12	12	114	7
165883_3050_0895	132	AT	AT	117		127		11	5	117	5
183703_2259_0789	132	TGT	AAC	98		132		35	11	98	0
183703_2259_0789	132	CTG	AGC	18		29		12	4	18	103
222685_1823_3003	132	TAGG	ACCT	116		127		12	3	116	5
222685_1823_3003	132	AG	AG	68		115		48	24	68	17
247343_2965_0186	132	CA	AC	124		132		9	4	124	0
247343_2965_0186	132	TC	AG	105		122		18	9	105	10
292190_0576_2100	132	TC	AG	10		17		8	4	10	115
313583_0601_3761	132	GT	AC	110		127		18	9	110	5
403087_2331_2207	132	GGGAG	AGGGG	90		105		16	3	90	27
405049_2547_0500	132	TG	AC	107		114		8	4	107	18
421169_0751_3076	132	AT	AT	17		27		11	5	17	105
050363_1703_3218	133	CTC	AGG	43		59		17	5	43	74
117026_3095_3822	133	GAAA	AAAG	61		83		23	5	61	50
138362_0476_0429	133	TG	AC	70		89		20	10	70	44
156390_1698_1437	133	GT	AC	67		80		14	7	67	53
258106_2347_0118	133	G	C	82		89		8	8	82	44
259690_0346_3164	133	TC	AG	68		78		11	5	68	55
259690_0346_3164	133	CT	AG	49		56		8	4	49	77
259690_0346_3164	133	TC	AG	58		66		9	4	58	67
277479_1133_1115	133	A	A	70		81		12	12	70	52
277479_1133_1115	133	A	A	47		57		11	11	47	76
277479_1133_1115	133	A	A	59		66		8	8	59	67
463606_2678_2673	133	CGC	CCG	72		84		13	4	72	49
136757_0813_3137	133	C	C	37		44		8	8	37	89
181875_1216_3673	133	GAG	AGG	87		102		16	5	87	31
277479_1133_1115	133	A	A	85		94		10	10	85	39
277479_1133_1115	133	A	A	35		44		10	10	35	89
386873_0746_0166	133	GT	AC	33		50		18	9	33	83
386873_0746_0166	133	AG	AG	52		96		45	22	52	37
435736_0692_0200	133	GA	AG	32		39		8	4	32	94
014778_3167_3007	133	TA	AT	1		8		8	4	1	125
024716_3150_0449	133	AG	AG	104		133		30	15	104	0
028329_1778_1143	133	GT	AC	1		20		20	10	1	113
028329_1778_1143	133	GA	AG	92		119		28	14	92	14
031791_1538_2802	133	GA	AG	74		117		44	22	74	16
122219_3511_3717	133	GT	AC	1		20		20	10	1	113
122219_3511_3717	133	GA	AG	92		119		28	14	92	14
136757_0813_3137	133	TA	AT	90		132		43	21	90	1
138362_0476_0429	133	AG	AG	90		119		30	15	90	14
138362_0476_0429	133	GA	AG	123		133		11	5	123	0
156390_1698_1437	133	CA	AC	94		130		37	18	94	3
193642_0601_3185	133	TA	AT	111		121		11	5	111	12
209868_2667_1730	133	ATCTAT	ATATAG	17		35		19	3	17	98
266853_3707_0446	133	CT	AG	123		133		11	5	123	0
315911_2567_1880	133	TG	AC	113		133		21	10	113	0
315911_2567_1880	133	GT	AC	68		111		44	22	68	22
334646_0611_3872	133	AT	AT	5		13		9	4	5	120
397139_2343_1528	133	C	C	24		40		17	17	24	93
443125_0774_3610	133	CA	AC	1		15		15	7	1	118
059989_2503_2649	134	CTC	AGG	41		56		16	5	41	78
075760_2330_3681	134	TGTCAG	ACACTG	49		67		19	3	49	67
189636_1289_1972	134	GAG	AGG	45		60		16	5	45	74
333194_3659_1001	134	T	A	83		91		9	9	83	43
361260_3359_0849	134	TG	AC	70		89		20	10	70	45
449169_2629_3340	134	T	A	52		59		8	8	52	75
449169_2629_3340	134	T	A	73		84		12	12	73	50
004577_0855_0612	134	TA	AT	92		102		11	5	92	32
449169_2629_3340	134	T	A	89		98		10	10	89	36
449169_2629_3340	134	T	A	34		41		8	8	34	93
017587_1771_2565	134	AAG	AAG	102		121		20	6	102	13
038228_2292_0619	134	ATTT	AAAT	12		23		12	3	12	111
059989_2503_2649	134	CGG	CCG	102		113		12	4	102	21
136895_3206_0253	134	AG	AG	80		129		50	25	80	5
179266_3162_2665	134	CT	AG	96		134		39	19	96	0
270628_2805_3977	134	TA	AT	24		31		8	4	24	103
280496_1134_0055	134	AAG	AAG	114		134		21	7	114	0
338553_1925_2829	134	A	A	126		133		8	8	126	1
361260_3359_0849	134	AG	AG	90		119		30	15	90	15
361260_3359_0849	134	GA	AG	123		131		9	4	123	3
411701_0169_1199	134	GT	AC	83		134		52	26	83	0
449169_2629_3340	134	T	A	100		109		10	10	100	25
449169_2629_3340	134	T	A	15		22		8	8	15	112
449169_2629_3340	134	T	A	24		32		9	9	24	102
088277_3195_0300	135	TTC	AAG	42		53		12	4	42	82
105809_2389_2158	135	AT	AT	63		71		9	4	63	64
129110_1359_0999	135	AGAGGG	AGAGGG	56		79		24	4	56	56
271768_1235_2621	135	TG	AC	70		89		20	10	70	46
414058_2694_3249	135	TC	AG	57		67		11	5	57	68
414058_2694_3249	135	TCTA	ATAG	65		95		31	7	65	40
423000_2349_3223	135	AT	AT	46		58		13	6	46	77
437954_0485_1905	135	GA	AG	78		85		8	4	78	50
437954_0485_1905	135	C	C	61		71		11	11	61	64
001135_1124_2002	135	TCT	AAG	33		49		17	5	33	86
129110_1359_0999	135	GCGAGG	AGGGCG	37		55		19	3	37	80
423000_2349_3223	135	GT	AC	89		96		8	4	89	39
001135_1124_2002	135	TCT	AAG	12		28		17	5	12	107
005098_1429_1413	135	AT	AT	1		15		15	7	1	120
008120_2261_3786	135	TACA	ATAC	104		118		15	3	104	17
012623_1187_2960	135	TG	AC	77		106		30	15	77	29
012623_1187_2960	135	GT	AC	108		116		9	4	108	19
012623_1187_2960	135	G	C	125		134		10	10	125	1
085388_2478_2216	135	CAA	AAC	118		129		12	4	118	6
085388_2478_2216	135	CAA	AAC	10		29		20	6	10	106
085388_2478_2216	135	CAA	AAC	97		116		20	6	97	19
105809_2389_2158	135	AG	AG	87		134		48	24	87	1
175105_3815_3674	135	AT	AT	14		21		8	4	14	114
271768_1235_2621	135	AG	AG	90		119		30	15	90	16
271768_1235_2621	135	GA	AG	123		131		9	4	123	4
305778_4001_2218	135	A	A	107		115		9	9	107	20
305778_4001_2218	135	A	A	117		124		8	8	117	11
394535_2857_2229	135	AT	AT	82		135		54	27	82	0
401158_3796_2600	135	AG	AG	92		130		39	19	92	5
414058_2694_3249	135	CA	AC	107		114		8	4	107	21
437954_0485_1905	135	AG	AG	16		23		8	4	16	112
011262_3079_3385	136	T	A	82		89		8	8	82	47
279525_1200_2235	136	AT	AT	46		64		19	9	46	72
341148_1685_4016	136	TTC	AAG	71		82		12	4	71	54
377602_1440_1447	136	CAAAG	AAAGC	43		58		16	3	43	78
464495_3422_1847	136	TC	AG	45		52		8	4	45	84
039967_1389_1529	136	TGA	ATC	31		44		14	4	31	92
011509_0905_3283	136	TA	AT	116		125		10	5	116	11
021393_1180_1238	136	TA	AT	95		108		14	7	95	28
024179_1205_3679	136	AC	AC	87		128		42	21	87	8
039967_1389_1529	136	AG	AG	110		117		8	4	110	19
053075_3816_2010	136	AG	AG	100		135		36	18	100	1
113801_0543_1041	136	GA	AG	12		19		8	4	12	117
154656_0430_2657	136	T	A	128		136		9	9	128	0
231073_3921_1405	136	C	C	120		127		8	8	120	9
257677_2500_2584	136	AT	AT	74		136		63	31	74	0
271493_3069_1423	136	GT	AC	111		118		8	4	111	18
314677_2218_3460	136	C	C	114		125		12	12	114	11
003888_2843_0097	137	CT	AG	90		97		8	4	90	40
006678_1435_1156	137	GA	AG	55		71		17	8	55	66
066628_3706_1926	137	CTT	AAG	45		70		26	8	45	67
087309_0173_0987	137	CT	AG	74		81		8	4	74	56
362247_2626_1911	137	GA	AG	74		85		12	6	74	52
426889_2275_3140	137	TC	AG	75		82		8	4	75	55
006678_1435_1156	137	GA	AG	81		106		26	13	81	31
066628_3706_1926	137	CTT	AAG	30		43		14	4	30	94
087309_0173_0987	137	AC	AC	39		72		34	17	39	65
142857_3946_0515	137	T	A	95		102		8	8	95	35
199015_3226_1061	137	AT	AT	30		42		13	6	30	95
203079_1555_1441	137	TTC	AAG	91		102		12	4	91	35
362247_2626_1911	137	GA	AG	38		47		10	5	38	90
002682_1120_2834	137	TG	AC	87		128		42	21	87	9
006678_1435_1156	137	TG	AC	23		30		8	4	23	107
066628_3706_1926	137	CTT	AAG	114		127		14	4	114	10
085322_0674_1343	137	TA	AT	86		127		42	21	86	10
087309_0173_0987	137	CT	AG	28		36		9	4	28	101
105690_2184_3621	137	CA	AC	2		10		9	4	2	127
142857_3946_0515	137	T	A	105		113		9	9	105	24
180244_1511_2376	137	TTC	AAG	89		125		37	12	89	12
203079_1555_1441	137	CTT	AAG	1		31		31	10	1	106
203079_1555_1441	137	TTC	AAG	109		121		13	4	109	16
207635_2987_3487	137	GTT	AAC	57		124		68	22	57	13
248749_1487_1787	137	AT	AT	99		113		15	7	99	24
282487_1251_3786	137	TA	AT	123		137		15	7	123	0
362247_2626_1911	137	AG	AG	87		121		35	17	87	16
424356_3064_0096	137	T	A	126		136		11	11	126	1
427594_3119_1806	137	A	A	129		136		8	8	129	1
456471_2918_3385	137	TAGGT	AACCT	15		29		15	3	15	108
456471_2918_3385	137	TCT	AAG	123		134		12	4	123	3
456471_2918_3385	137	CT	AG	99		122		24	12	99	15
065933_0625_0594	138	AT	AT	53		63		11	5	53	75
103447_3854_3250	138	GA	AG	50		60		11	5	50	78
311693_3622_3977	138	AG	AG	64		88		25	12	64	50
311693_3622_3977	138	AG	AG	90		98		9	4	90	40
412876_0633_0151	138	CT	AG	54		62		9	4	54	76
269151_2979_1446	138	GA	AG	73		108		36	18	73	30
311693_3622_3977	138	AG	AG	100		107		8	4	100	31
471488_0442_2915	138	T	A	34		41		8	8	34	97
008859_1124_0332	138	G	C	123		130		8	8	123	8
125804_1759_2911	138	AT	AT	131		138		8	4	131	0
331427_2377_2041	138	A	A	121		128		8	8	121	10
335590_3150_2739	138	GA	AG	79		119		41	20	79	19
380063_1177_3976	138	AG	AG	82		135		54	27	82	3
393466_2962_2524	138	CGC	CCG	101		112		12	4	101	26
041385_1433_0515	139	GA	AG	70		92		23	11	70	47
098036_0322_1355	139	CAA	AAC	78		91		14	4	78	48
127527_2600_2162	139	TGGG	ACCC	81		92		12	3	81	47
230132_1390_0933	139	GT	AC	79		92		14	7	79	47
284047_0310_0162	139	CT	AG	55		63		9	4	55	76
041385_1433_0515	139	GA	AG	94		102		9	4	94	37
093475_1391_0166	139	TC	AG	39		46		8	4	39	93
094412_0223_0690	139	CTC	AGG	31		45		15	5	31	94
098036_0322_1355	139	CAA	AAC	30		42		13	4	30	97
041385_1433_0515	139	GA	AG	104		122		19	9	104	17
084773_2915_2307	139	GA	AG	73		114		42	21	73	25
098036_0322_1355	139	CAA	AAC	120		133		14	4	120	6
184074_0149_0078	139	C	C	120		129		10	10	120	10
193437_0829_3477	139	TA	AT	10		17		8	4	10	122
224392_0329_3775	139	TA	AT	99		123		25	12	99	16
230132_1390_0933	139	TG	AC	102		118		17	8	102	21
230132_1390_0933	139	TG	AC	120		136		17	8	120	3
357327_1233_3007	139	T	A	122		130		9	9	122	9
441807_1104_3959	140	TC	AG	74		81		8	4	74	59
003162_1665_0833	140	TC	AG	17		24		8	4	17	116
004892_3647_1439	140	AG	AG	88		140		53	26	88	0
152575_3040_3323	140	GATG	ATCC	127		138		12	3	127	2
172612_0621_2716	140	AG	AG	90		138		49	24	90	2
413788_0442_3912	140	CCA	ACC	8		32		25	8	8	108
413788_0442_3912	140	C	C	1		9		9	9	1	131
413788_0442_3912	140	C	C	128		140		13	13	128	0
433789_0128_1629	140	A	A	121		128		8	8	121	12
092239_1533_3979	141	AT	AT	51		63		13	6	51	78
157326_2345_1316	141	A	A	82		91		10	10	82	50
185310_2909_3160	141	AG	AG	71		99		29	14	71	42
429075_2745_1882	141	TA	AT	64		74		11	5	64	67
157326_2345_1316	141	T	A	103		111		9	9	103	30
185310_2909_3160	141	AG	AG	100		109		10	5	100	32
312680_3196_2037	141	GAT	ATC	38		104		67	22	38	37
157326_2345_1316	141	GTGC	ACGC	12		25		14	3	12	116
173752_0680_1853	141	GT	AC	132		141		10	5	132	0
173752_0680_1853	141	TA	AT	89		131		43	21	89	10
243144_1162_3179	141	GA	AG	5		14		10	5	5	127
243144_1162_3179	141	AG	AG	24		31		8	4	24	110
331606_0471_1846	141	AT	AT	133		141		9	4	133	0
371114_1099_1826	141	ATCG	ATCG	102		113		12	3	102	28
388037_1000_2908	141	TC	AG	117		135		19	9	117	6
388037_1000_2908	141	TCC	AGG	97		116		20	6	97	25
401886_0381_3759	141	TA	AT	21		28		8	4	21	113
429388_2297_1557	141	GATG	ATCC	112		123		12	3	112	18
189845_2636_1744	142	GT	AC	72		97		26	13	72	45
399699_3866_1465	142	T	A	92		99		8	8	92	43
091052_2538_2726	142	TCT	AAG	90		106		17	5	90	36
195577_0065_1010	142	A	A	98		105		8	8	98	37
300396_2217_1827	142	TG	AC	95		104		10	5	95	38
399699_3866_1465	142	T	A	102		109		8	8	102	33
001258_0847_0898	142	TA	AT	1		10		10	5	1	132
097998_2291_2866	142	TA	AT	135		142		8	4	135	0
130961_3447_2671	142	CTT	AAG	1		42		42	14	1	100
189845_2636_1744	142	TG	AC	115		141		27	13	115	1
282898_3725_1871	142	TA	AT	108		118		11	5	108	24
300396_2217_1827	142	AG	AG	105		114		10	5	105	28
392374_2474_2147	142	G	C	25		32		8	8	25	110
399699_3866_1465	142	CT	AG	26		36		11	5	26	106
443431_1701_1915	142	TG	AC	17		26		10	5	17	116
092198_1854_1722	143	TGT	AAC	73		86		14	4	73	57
109992_2527_2320	143	TG	AC	60		67		8	4	60	76
223918_3707_1130	143	AG	AG	71		99		29	14	71	44
254858_2188_0417	143	GA	AG	86		94		9	4	86	49
260952_1345_2477	143	AC	AC	64		71		8	4	64	72
306128_2785_3003	143	TTC	AAG	64		75		12	4	64	68
055882_3040_0504	143	CT	AG	98		112		15	7	98	31
223918_3707_1130	143	AG	AG	101		110		10	5	101	33
260952_1345_2477	143	AC	AC	36		62		27	13	36	81
383330_2140_3686	143	AT	AT	37		47		11	5	37	96
018238_2002_1429	143	CTT	AAG	60		122		63	21	60	21
055882_3040_0504	143	AC	AC	113		138		26	13	113	5
092198_1854_1722	143	T	A	108		116		9	9	108	27
092198_1854_1722	143	TGT	AAC	1		14		14	4	1	129
092198_1854_1722	143	CTGTTG	AACAGC	15		40		26	4	15	103
109992_2527_2320	143	CTT	AAG	110		143		34	11	110	0
180672_3973_1817	143	T	A	15		22		8	8	15	121
182008_0995_2436	143	GA	AG	115		125		11	5	115	18
187762_1170_0259	143	TC	AG	17		25		9	4	17	118
214194_0419_3801	143	TTC	AAG	21		49		29	9	21	94
215748_0933_0812	143	AT	AT	8		18		11	5	8	125
229548_0575_3172	143	CA	AC	70		136		67	33	70	7
247355_0812_2058	143	CT	AG	11		18		8	4	11	125
456923_0974_3714	143	CA	AC	128		136		9	4	128	7
160833_2499_2848	144	A	A	65		72		8	8	65	72
165165_2508_0631	144	CT	AG	67		77		11	5	67	67
169462_1091_0120	144	GAA	AAG	79		90		12	4	79	54
171746_2421_3737	144	TG	AC	67		88		22	11	67	56
171746_2421_3737	144	GGGT	ACCC	44		56		13	3	44	88
179809_3608_1011	144	A	A	82		92		11	11	82	52
231298_0503_3241	144	CA	AC	82		89		8	4	82	55
411866_1926_1212	144	GT	AC	59		78		20	10	59	66
162641_0654_2046	144	CT	AG	30		38		9	4	30	106
176694_2617_0051	144	TA	AT	98		108		11	5	98	36
179809_3608_1011	144	T	A	104		112		9	9	104	32
018310_3258_2262	144	GCG	CCG	125		136		12	4	125	8
021572_1651_3537	144	TA	AT	104		144		41	20	104	0
059766_3395_3164	144	T	A	119		126		8	8	119	18
165165_2508_0631	144	CA	AC	89		125		37	18	89	19
165165_2508_0631	144	CA	AC	127		136		10	5	127	8
171746_2421_3737	144	TG	AC	8		17		10	5	8	127
179809_3608_1011	144	GTGC	ACGC	12		25		14	3	12	119
196675_1898_2227	144	GA	AG	70		138		69	34	70	6
200912_3356_2150	144	TA	AT	89		139		51	25	89	5
247954_3922_1508	144	A	A	134		141		8	8	134	3
264951_3557_2675	144	CA	AC	79		134		56	28	79	10
279036_2999_3392	144	CTT	AAG	81		144		64	21	81	0
011830_0273_1539	145	TGCA	ATGC	73		84		12	3	73	61
087197_1002_1354	145	AT	AT	61		71		11	5	61	74
151986_3145_0555	145	TG	AC	80		95		16	8	80	50
151986_3145_0555	145	AG	AG	96		105		10	5	96	40
217098_3959_0870	145	TC	AG	80		88		9	4	80	57
320749_1726_2460	145	TA	AT	45		53		9	4	45	92
377715_3560_2362	145	CT	AG	64		72		9	4	64	73
379336_2880_2830	145	GCA	AGC	72		92		21	7	72	53
217098_3959_0870	145	GT	AC	98		108		11	5	98	37
399140_0246_2431	145	TCC	AGG	95		115		21	7	95	30
458769_1451_2217	145	AC	AC	86		113		28	14	86	32
001019_0292_0362	145	AG	AG	88		140		53	26	88	5
003181_1639_2234	145	G	C	137		145		9	9	137	0
013613_3313_1293	145	AG	AG	123		132		10	5	123	13
103072_2247_3692	145	CT	AG	16		23		8	4	16	122
137314_2896_1228	145	GA	AG	121		131		11	5	121	14
151986_3145_0555	145	GA	AG	107		116		10	5	107	29
151986_3145_0555	145	AG	AG	118		125		8	4	118	20
174461_3092_3774	145	AT	AT	19		26		8	4	19	119
213690_2605_1639	145	GAG	AGG	20		31		12	4	20	114
320749_1726_2460	145	TA	AT	109		138		30	15	109	7
377715_3560_2362	145	T	A	118		128		11	11	118	17
383637_3440_3020	145	AG	AG	114		121		8	4	114	24
458769_1451_2217	145	AC	AC	121		135		15	7	121	10
458769_1451_2217	145	TA	AT	136		145		10	5	136	0
004256_0959_1945	146	CTT	AAG	69		85		17	5	69	61
006977_0851_0528	146	TA	AT	92		102		11	5	92	44
009525_3252_1514	146	AAC	AAC	40		67		28	9	40	79
009525_3252_1514	146	AGCAAC	AACAGC	76		94		19	3	76	52
009600_0845_1782	146	TA	AT	93		103		11	5	93	43
035205_3408_2930	146	TA	AT	53		61		9	4	53	85
086036_3381_0821	146	C	C	51		58		8	8	51	88
439134_0588_2081	146	GA	AG	83		103		21	10	83	43
461376_0712_3981	146	ACA	AAC	45		57		13	4	45	89
461376_0712_3981	146	CAA	AAC	76		88		13	4	76	58
461376_0712_3981	146	CAA	AAC	89		102		14	4	89	44
100493_2473_0531	146	AT	AT	91		107		17	8	91	39
439134_0588_2081	146	AG	AG	105		112		8	4	105	34
004256_0959_1945	146	CTCCTT	AAGGAG	111		133		23	3	111	13
004256_0959_1945	146	TCCTTC	AAGGAG	1		22		22	3	1	124
009525_3252_1514	146	AAC	AAC	132		146		15	5	132	0
009946_1706_2694	146	AG	AG	87		133		47	23	87	13
068269_3697_0145	146	TA	AT	112		122		11	5	112	24
086036_3381_0821	146	TA	AT	105		146		42	21	105	0
213937_0708_2056	146	AG	AG	73		139		67	33	73	7
312526_1242_3233	146	TA	AT	124		134		11	5	124	12
378737_1604_0533	146	AT	AT	87		141		55	27	87	5
382479_1176_2665	146	TC	AG	124		135		12	6	124	11
461376_0712_3981	146	CAG	AGC	23		36		14	4	23	110
004805_2398_1088	147	CT	AG	41		48		8	4	41	99
028505_1326_1247	147	AG	AG	63		75		13	6	63	72
028505_1326_1247	147	AG	AG	83		90		8	4	83	57
044661_3426_0377	147	CT	AG	62		69		8	4	62	78
158417_1994_1975	147	GA	AG	69		76		8	4	69	71
214709_2180_1726	147	GA	AG	80		92		13	6	80	55
214709_2180_1726	147	GA	AG	98		106		9	4	98	41
240424_2910_1048	147	GAA	AAG	95		111		17	5	95	36
016107_3211_2581	147	AT	AT	19		27		9	4	19	120
020489_0161_2198	147	TTC	AAG	11		22		12	4	11	125
020489_0161_2198	147	CTT	AAG	130		147		18	6	130	0
044699_3589_1675	147	TCT	AAG	1		30		30	10	1	117
072904_1825_3621	147	GA	AG	88		143		56	28	88	4
091011_2006_2259	147	GA	AG	3		13		11	5	3	134
114335_0626_0473	147	AT	AT	20		30		11	5	20	117
214709_2180_1726	147	G	C	120		134		15	15	120	13
228918_3376_1415	147	A	A	13		20		8	8	13	127
271733_2509_2028	147	AT	AT	22		32		11	5	22	115
302898_2935_1855	147	CT	AG	26		36		11	5	26	111
311899_2312_0801	147	CA	AC	72		123		52	26	72	24
311899_2312_0801	147	AC	AC	127		138		12	6	127	9
473511_2958_2136	147	GCG	CCG	126		137		12	4	126	10
006127_3971_1364	148	AGA	AAG	96		108		13	4	96	40
016846_1106_2981	148	C	C	79		92		14	14	79	56
017092_2282_3212	148	AT	AT	42		49		8	4	42	99
040177_2509_1937	148	TTC	AAG	73		92		20	6	73	56
040177_2509_1937	148	TCT	AAG	59		71		13	4	59	77
073091_2988_2815	148	TTC	AAG	77		105		29	9	77	43
097723_1265_2465	148	GA	AG	59		66		8	4	59	82
122530_2388_2045	148	GT	AC	44		54		11	5	44	94
403058_0992_1250	148	TG	AC	63		72		10	5	63	76
403058_0992_1250	148	AG	AG	73		93		21	10	73	55
403058_0992_1250	148	GC	CG	54		62		9	4	54	86
073091_2988_2815	148	AAG	AAG	30		41		12	4	30	107
380792_3757_2753	148	AT	AT	104		111		8	4	104	37
013409_0717_0038	148	GT	AC	141		148		8	4	141	0
016846_1106_2981	148	AC	AC	96		145		50	25	96	3
073091_2988_2815	148	AAG	AAG	1		29		29	9	1	119
097723_1265_2465	148	TG	AC	93		142		50	25	93	6
121042_1557_2725	148	GCC	CCG	1		12		12	4	1	136
122530_2388_2045	148	TC	AG	26		34		9	4	26	114
398800_1004_2143	148	CT	AG	120		145		26	13	120	3
409046_3975_3129	148	T	A	10		17		8	8	10	131
069909_2644_2286	149	TTG	AAC	56		79		24	8	56	70
086393_2429_0039	149	GA	AG	99		106		8	4	99	43
207631_3135_0454	149	GT	AC	51		59		9	4	51	90
293671_0487_2434	149	AT	AT	70		78		9	4	70	71
301520_1845_1864	149	T	A	77		85		9	9	77	64
301520_1845_1864	149	GT	AC	86		94		9	4	86	55
378640_0136_1234	149	AT	AT	57		64		8	4	57	85
383384_2282_1460	149	AT	AT	96		106		11	5	96	43
409157_3290_2372	149	A	A	63		70		8	8	63	79
425573_3069_1435	149	GA	AG	77		94		18	9	77	55
425573_3069_1435	149	AG	AG	96		106		11	5	96	43
431221_0200_0180	149	TG	AC	50		57		8	4	50	92
496485_0484_1055	149	A	A	93		104		12	12	93	45
301520_1845_1864	149	G	C	99		112		14	14	99	37
326115_0501_2326	149	CAA	AAC	96		112		17	5	96	37
383384_2282_1460	149	AC	AC	110		118		9	4	110	31
446816_0423_3499	149	CAT	ATC	33		44		12	4	33	105
006505_1174_1259	149	GAA	AAG	121		132		12	4	121	17
006505_1174_1259	149	AG	AG	135		142		8	4	135	7
025584_1130_1822	149	TGTA	ATAC	1		57		57	14	1	92
064810_3870_0266	149	AG	AG	110		144		35	17	110	5
123891_0049_1705	149	TA	AT	131		141		11	5	131	8
146837_0392_3722	149	AT	AT	9		21		13	6	9	128
174949_0968_2501	149	TA	AT	134		144		11	5	134	5
201347_0265_2434	149	GA	AG	83		149		67	33	83	0
211631_2898_2755	149	AG	AG	99		141		43	21	99	8
293671_0487_2434	149	GA	AG	6		13		8	4	6	136
383384_2282_1460	149	TA	AT	119		149		31	15	119	0
425573_3069_1435	149	AG	AG	108		121		14	7	108	28
425573_3069_1435	149	G	C	15		24		10	10	15	125
431221_0200_0180	149	TCT	AAG	96		120		25	8	96	29
431916_0522_2400	149	AT	AT	19		27		9	4	19	122
042791_0447_2047	150	CT	AG	85		93		9	4	85	57
042791_0447_2047	150	TC	AG	96		104		9	4	96	46
301506_3266_0418	150	AT	AT	81		102		22	11	81	48
359812_2790_0339	150	TG	AC	93		104		12	6	93	46
068804_2158_2662	150	CT	AG	105		113		9	4	105	37
301506_3266_0418	150	TA	AT	104		117		14	7	104	33
359812_2790_0339	150	AG	AG	105		114		10	5	105	36
042791_0447_2047	150	TC	AG	106		124		19	9	106	26
131485_2860_1716	150	CA	AC	134		150		17	8	134	0
131485_2860_1716	150	AC	AC	94		133		40	20	94	17
260654_0091_1564	150	ATT	AAT	87		138		52	17	87	12
301506_3266_0418	150	GA	AG	118		132		15	7	118	18
337894_3888_1360	150	TA	AT	1		10		10	5	1	140
359812_2790_0339	150	GA	AG	116		135		20	10	116	15
359812_2790_0339	150	AG	AG	137		144		8	4	137	6
363732_0736_2117	150	AT	AT	23		32		10	5	23	118
017725_0850_0899	151	AG	AG	48		55		8	4	48	96
067125_2493_3192	151	A	A	97		106		10	10	97	45
068734_3768_1581	151	A	A	88		95		8	8	88	56
117215_2409_1956	151	TCT	AAG	57		102		46	15	57	49
318974_0245_3264	151	AG	AG	101		108		8	4	101	43
318974_0245_3264	151	AG	AG	91		99		9	4	91	52
374998_2012_1493	151	GA	AG	102		109		8	4	102	42
017725_0850_0899	151	AG	AG	38		46		9	4	38	105
067125_2493_3192	151	A	A	109		116		8	8	109	35
094984_1847_3011	151	GGAG	AGGG	102		113		12	3	102	38
318974_0245_3264	151	GA	AG	110		118		9	4	110	33
017725_0850_0899	151	AG	AG	22		36		15	7	22	115
068734_3768_1581	151	T	A	136		144		9	9	136	7
094984_1847_3011	151	GA	AG	111		150		40	20	111	1
117215_2409_1956	151	TG	AC	7		16		10	5	7	135
205800_1442_3184	151	CCAT	ATCC	115		126		12	3	115	25
233206_1023_2044	151	TTC	AAG	21		49		29	9	21	102
318974_0245_3264	151	GA	AG	129		145		17	8	129	6
318974_0245_3264	151	GAGAG	AGAGG	114		133		20	4	114	18
341718_1490_1150	151	AC	AC	94		139		46	23	94	12
458611_2009_1480	151	T	A	120		127		8	8	120	24
016250_1634_2441	152	AATC	AATC	62		73		12	3	62	79
[truncated: 7,534 more rows]
